# Supplementary material for: Synthesis of novel naphthalene-heterocycle hybrids with potent antitumor, anti-inflammatory and antituberculosis activities
Source: Royal Society of Chemistry journal article supplement (doi:10.1039/d0ra08526j), 2020-01-01

## Supporting information

### Synthesis of Novel Naphthalene-Heterocycle Hybrids with Potent Antitumor, Anti-inflammatory and Antituberculosis Activities

Mohamed Ahmed Abozeid,<sup>a</sup> Aya Atef El-Sawi,<sup>a</sup> Mohamed Abdelmoteleb,<sup>b,c</sup> Hanem Awad,<sup>d</sup> Marwa Mostafa Abdel-Aziz,<sup>e</sup> Abdel-Rahman Hassan Abdel-Rahman<sup>a</sup> and El-Sayed Ibrahim El-Desoky<sup>\*a</sup>

<sup>a</sup>Department of Chemistry, Faculty of Science, Mansoura University, Mansoura-35516, Egypt

<sup>b</sup>Food Allergy Research & Resource Program (FARRP), Department of Food Science & Technology, University of Nebraska, Lincoln, NE, USA

<sup>c</sup>Department of Botany, Faculty of Science, Mansoura University, Mansoura-35516, Egypt

<sup>d</sup>Department of Tanning Materials and Leather Technology, Chemical Industries Research Division, National Research Centre, 33 EL-Bohouth St., Dokki 12622, Giza. Egypt.

<sup>e</sup>The Regional Center for Mycology and Biotechnology, Al-Azhar University, Cairo 11759, Egypt.

\*Corresponding Author: E-mail: [prof.deosky.orgchem@gmail.com](mailto:prof.deosky.orgchem@gmail.com); [desoky199@mans.edu.eg](mailto:desoky199@mans.edu.eg); Tel: 00201060614054.

#### Contents:

|                                                                      |           |
|----------------------------------------------------------------------|-----------|
| <b>1. Spectral data</b>                                              | <b>2</b>  |
| <b>2. Pharmacokinetic parameters of the synthesized derivatives</b>  | <b>42</b> |
| <b>3. Role of hydrophobic interactions in docking of compound 3c</b> | <b>43</b> |

# 1. Spectral data

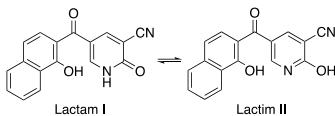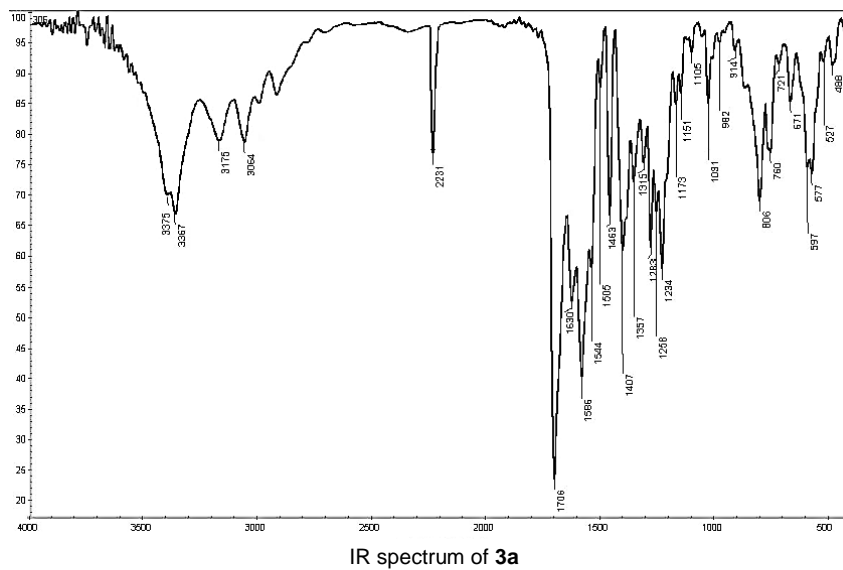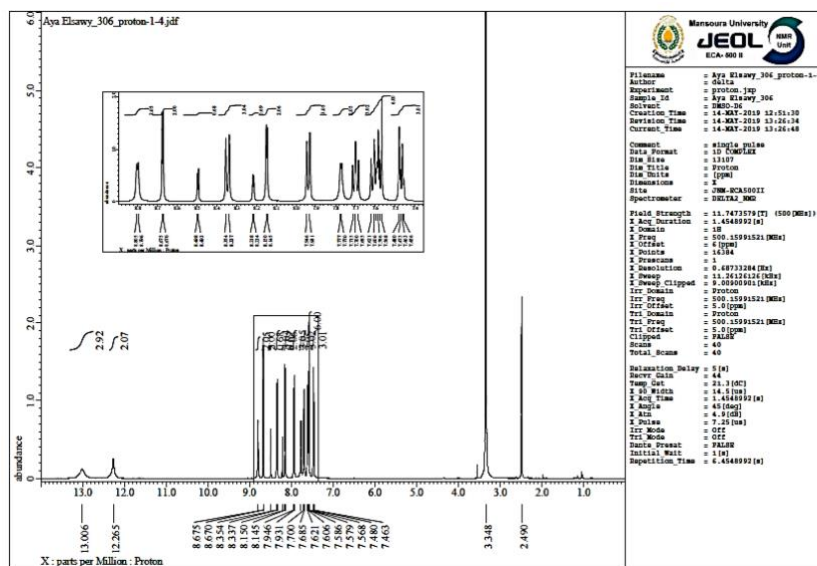

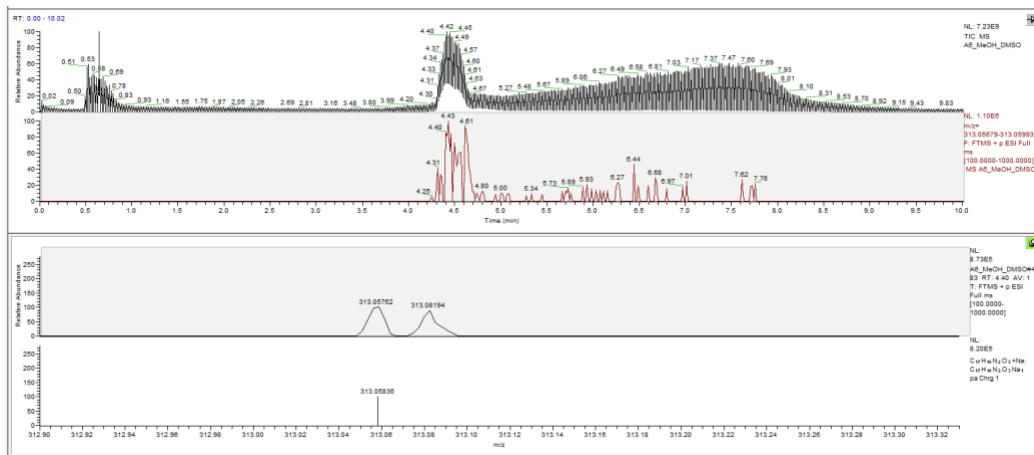

HR-MS spectrum of 3a

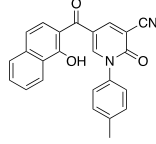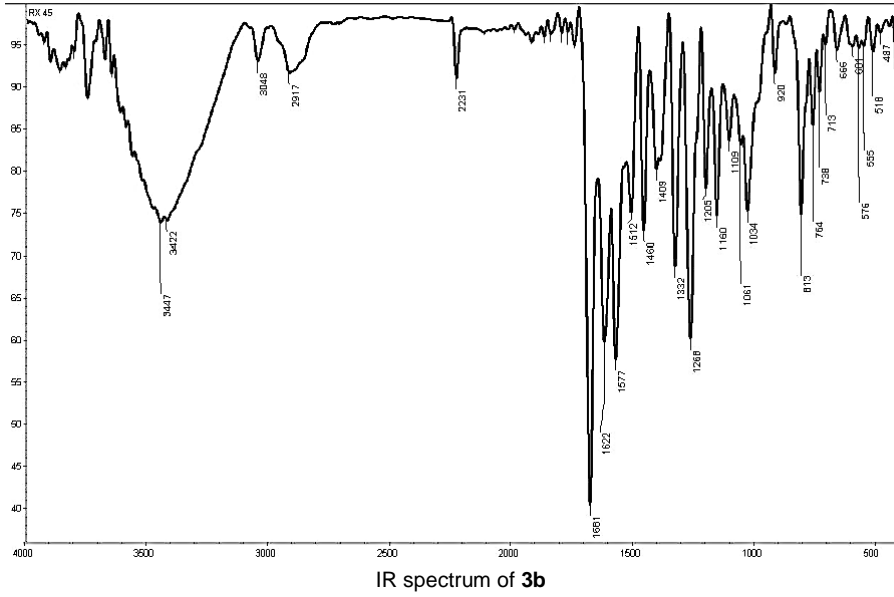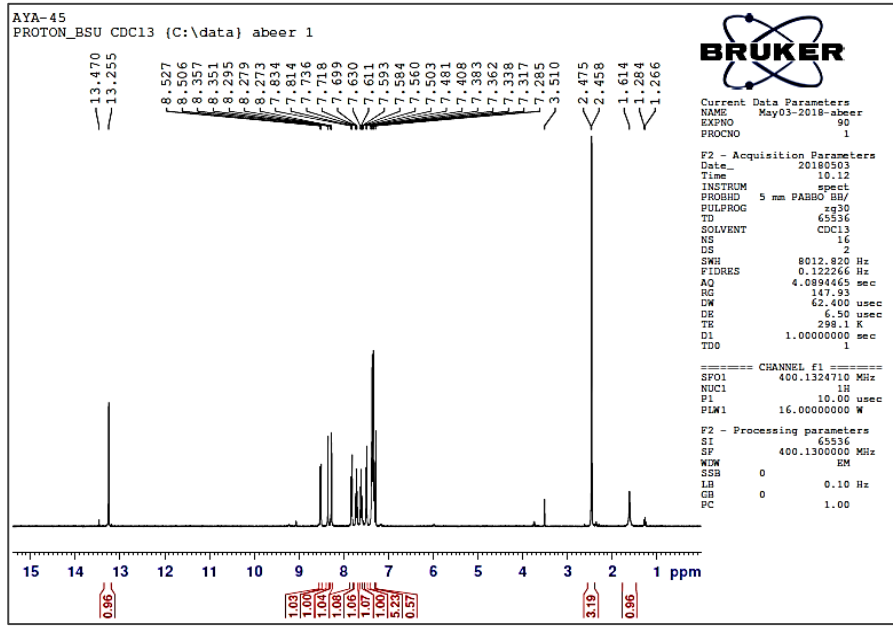

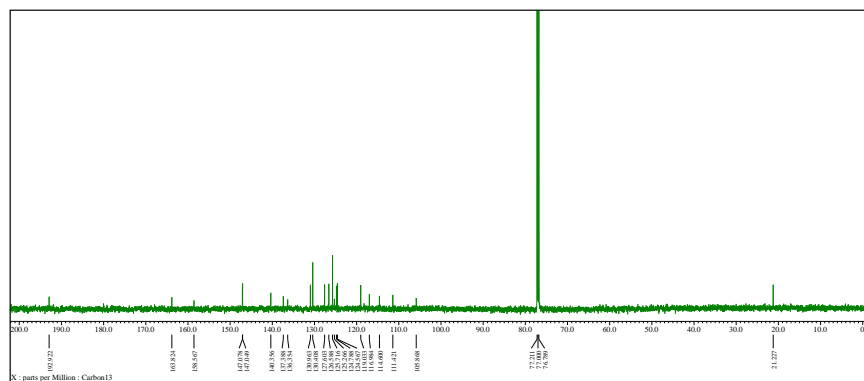

<sup>13</sup>C NMR spectrum of 3b

C:\xcalib\data\1\aya-45

27-Nov-16 12:32:34 PM  
THE REGIONAL CENTER FOR MYCOLOGY AND BIOTECHNOLOGY  
AZHAR UNIVERSITY

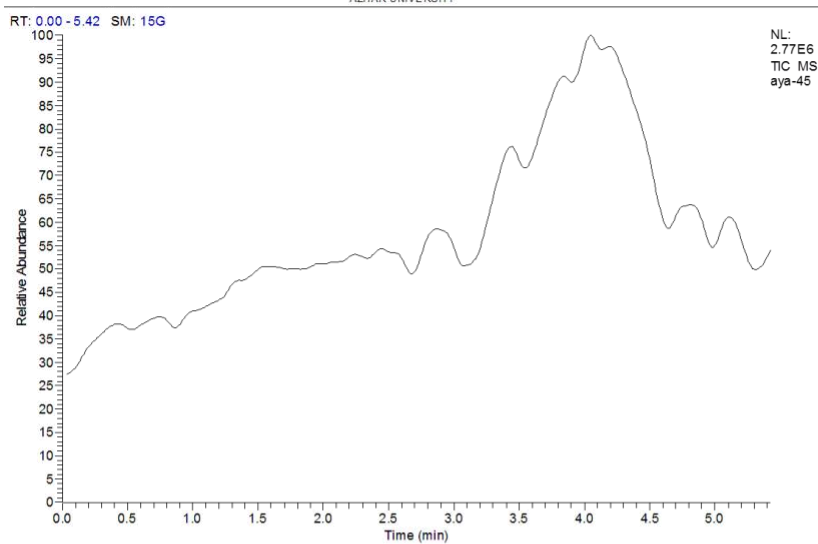

aya-45 #240 RT: 4.03 AV: 1 SB: 2 4.05, 4.05 NL: 2.72E3  
T: (0.0) + c EI Full ms [40.00-1000.00]

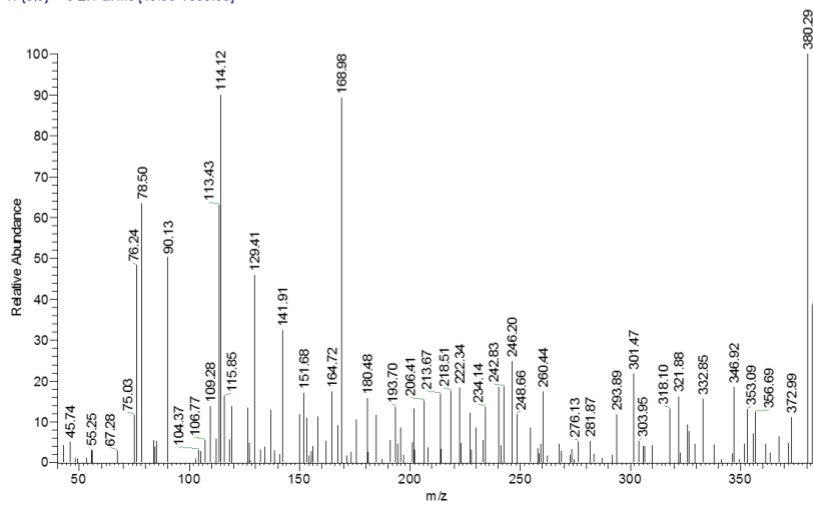

Mass spectrum of 3b

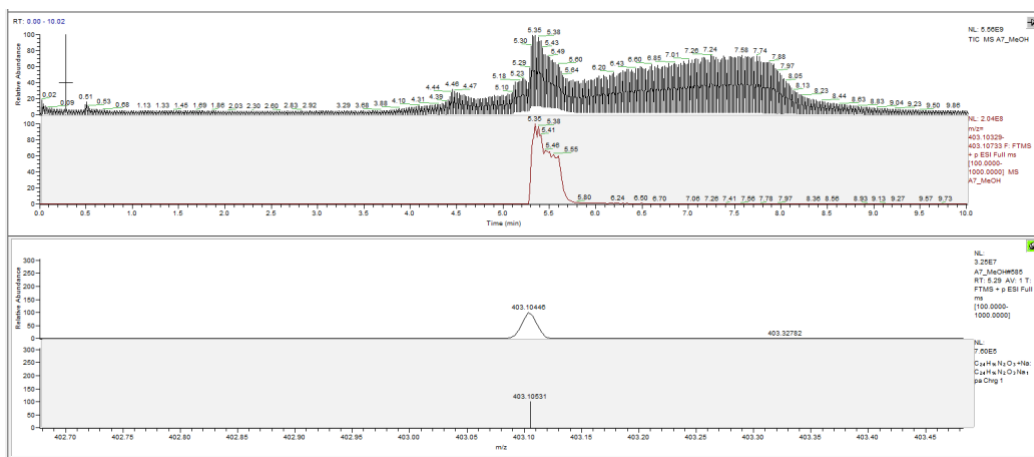

HR-MS spectrum of **3b**

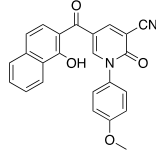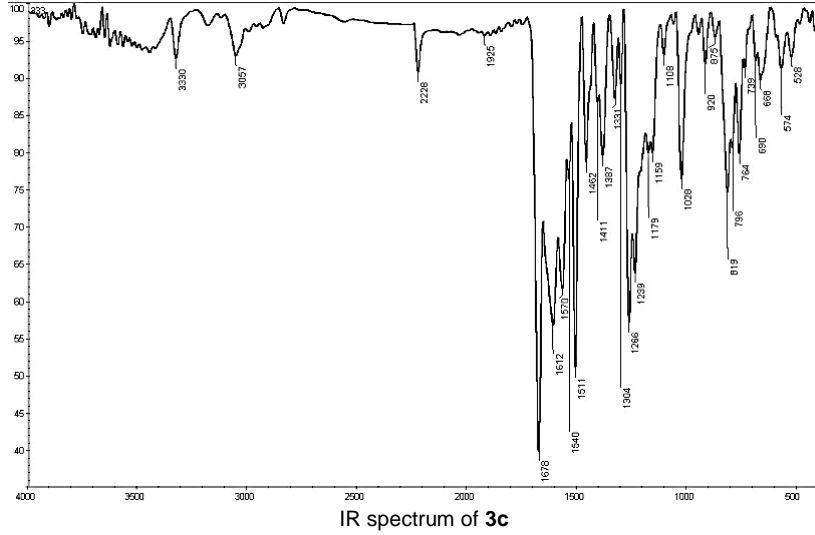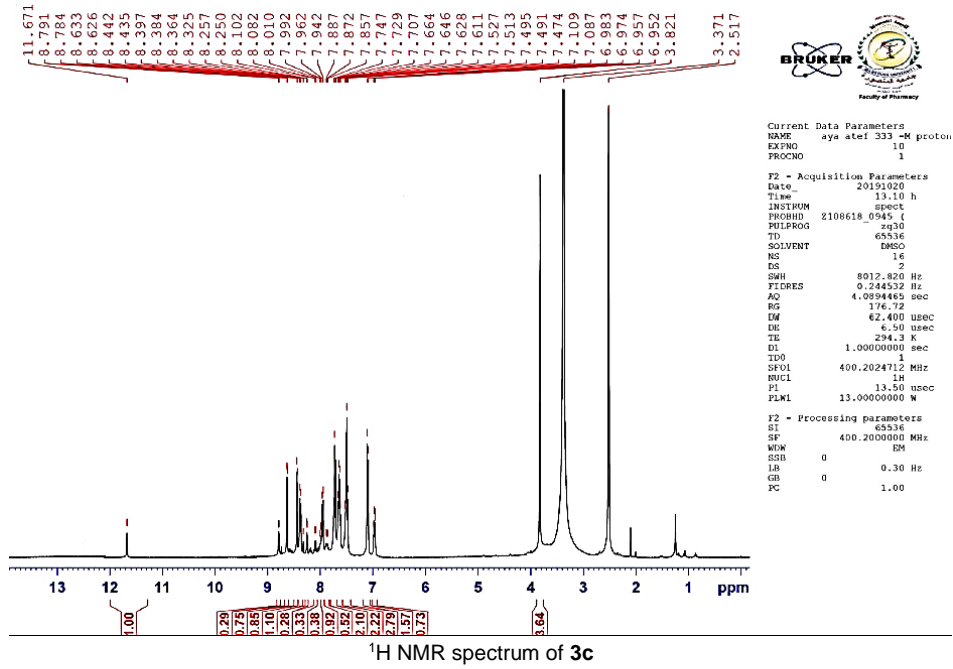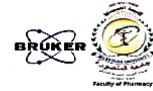

Current Data Parameters  
 NAME aya atef 333 -M proton  
 EXPNO 10  
 PROCNO 1

F2 - Acquisition Parameters  
 Date\_ 20191020  
 Time 13:10 h  
 INSTRUM spect  
 PROBRG 2108618\_0945 (   
 PULPROG zg30  
 TD 65536  
 SOLVENT DMSO  
 NS 16  
 DS 2  
 SWH 8012.820 Hz  
 FIDRES 0.244532 Hz  
 AQ 4.0894465 sec  
 RG 176.92  
 DM 62.400 usec  
 DE 6.50 usec  
 TE 294.3 K  
 D1 1.00000000 sec  
 T10 1  
 SF01 400.2024712 MHz  
 RUC1 1H  
 F1 13.50 usec  
 FLW1 13.00000000 N

F2 - Processing parameters  
 SI 65536  
 SF 400.2000000 MHz  
 WDW EM  
 SSB 0  
 LB 0.30 Hz  
 GB 0  
 PC 1.00

RT: 3.78 - 4.20 SM: 15G

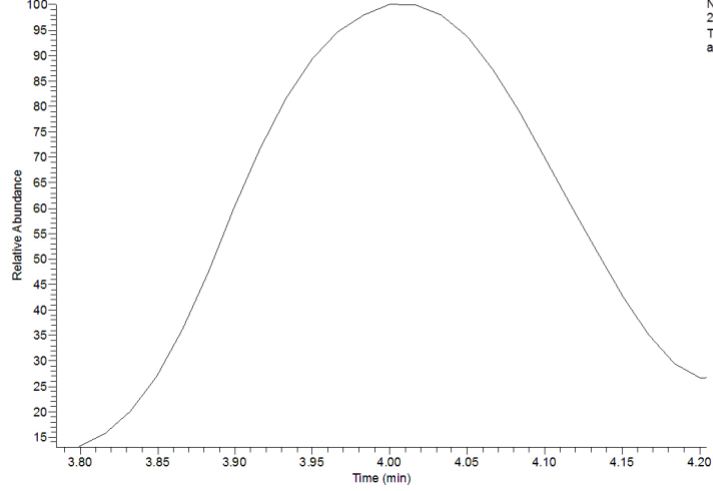

aya-333 #256 RT: 4.30 AV: 1 SB: 2 4.47, 4.47 NL: 3.09E2  
T: (0,0) + c EI Full ms [40.00-1000.00]

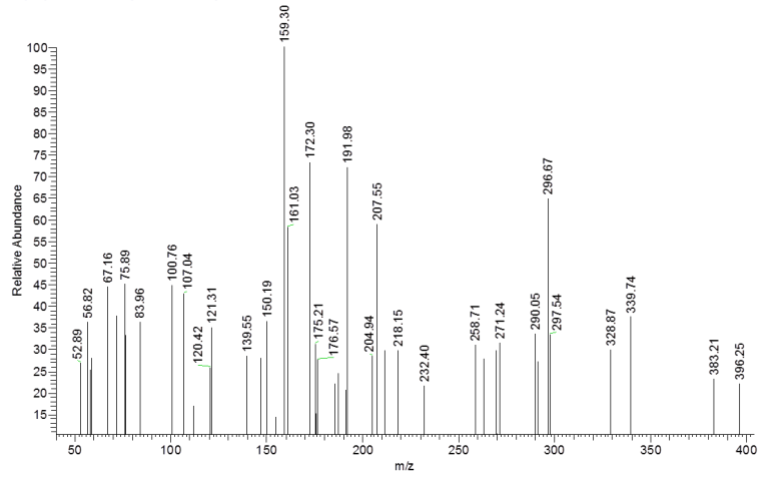

Mass spectrum of 3c

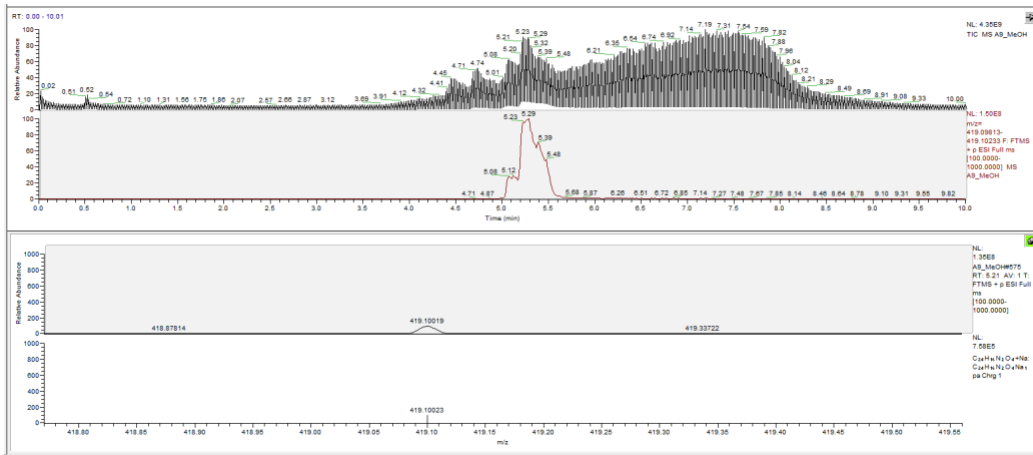

HR-MS spectrum of 3c



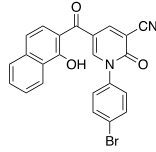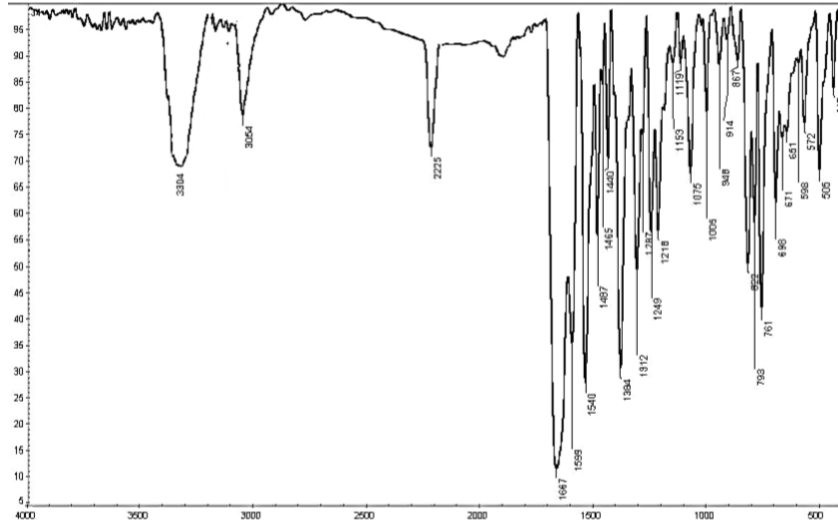

IR spectrum of 3d

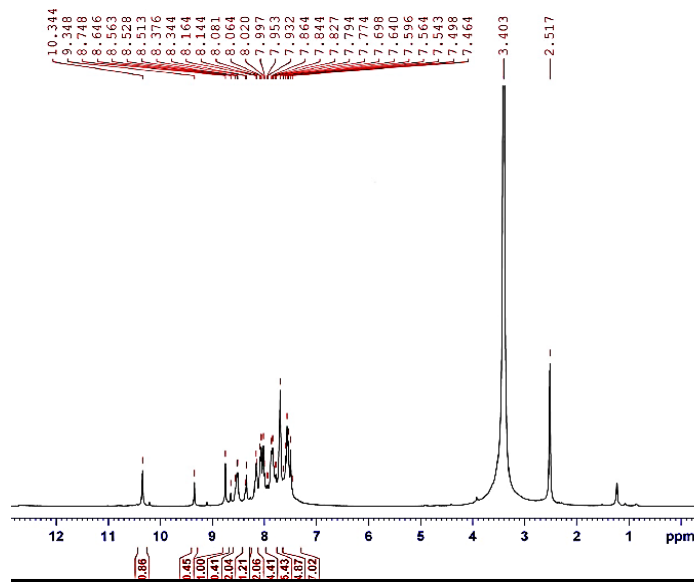

<sup>1</sup>H NMR spectrum of 3d

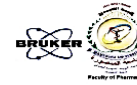

Current Data Parameters  
 NAME: Aya elswal 2d -H protc  
 EXPNO: 10  
 PROCNO: 1

F2 - Acquisition Parameters  
 Date\_: 20151117  
 Time: 8:59 h  
 INSTRUM: spect  
 PROBHD: z109418.0945 4  
 PULPROG: zgpg30  
 TD: 65536  
 SOLVENT: DMSO  
 NS: 16  
 DS: 2  
 SWH: 8012.820 Hz  
 FIDRES: 0.244532 Hz  
 AQ: 4.0854465 sec  
 M: 120.83  
 GM: 65.400 usec  
 DE: 6.50 usec  
 TE: 293.2 K  
 D1: 1.00000000 sec  
 T10: 1  
 SECT1: 400.2024712 MHz  
 NUC1: 1H  
 P1: 13.50 usec  
 PL1: 13.0000000 W

F2 - Processing parameters  
 SI: 65536  
 SF: 400.2000000 MHz  
 WMW: 04  
 SFR: 0  
 LB: 0  
 GB: 0  
 PC: 1.00

RT: 1.78 - 2.40 SM: 15G

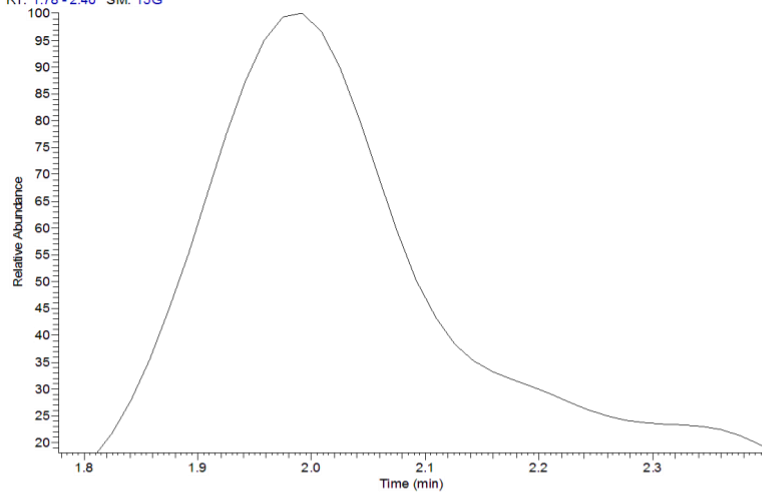

NL: 3.11E6  
TIC MS  
aya-34

aya-34 #208 RT: 3.50 AV: 1 SB: 2 4.52, 4.52 NL: 2.59E2  
T: (0,0) + c EI Full ms [40.00-1000.00]

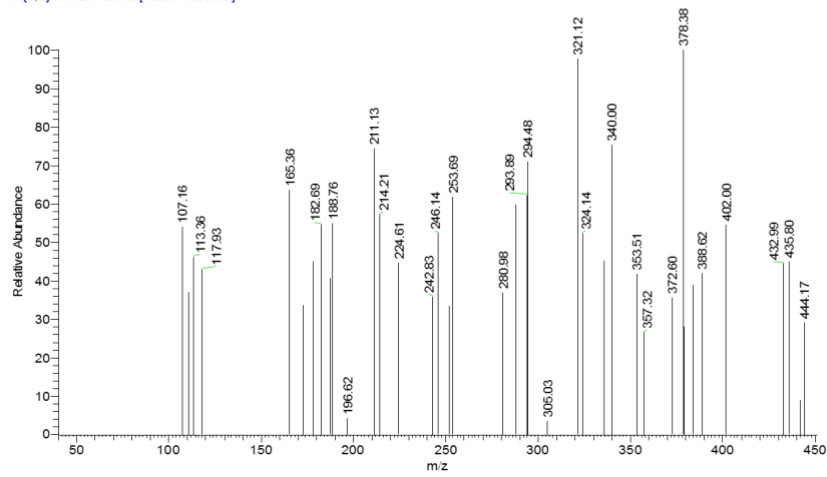

Mass spectrum of 3d

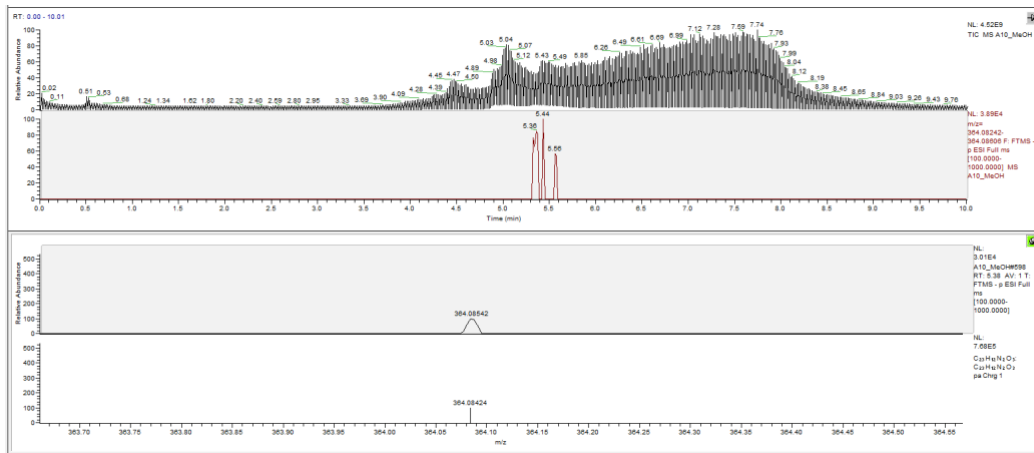

HR-MS spectrum of 3d

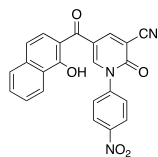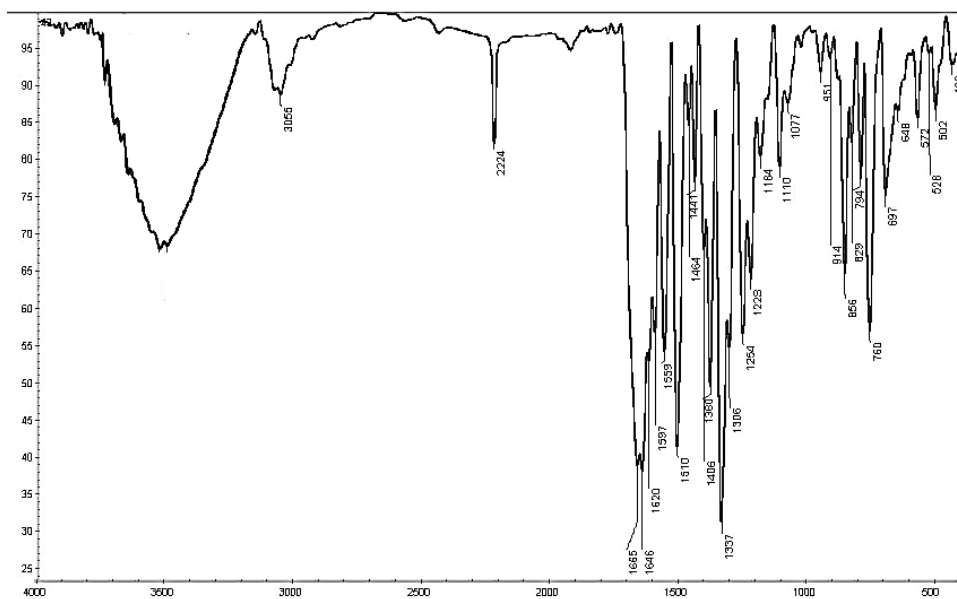

IR spectrum of **3e**

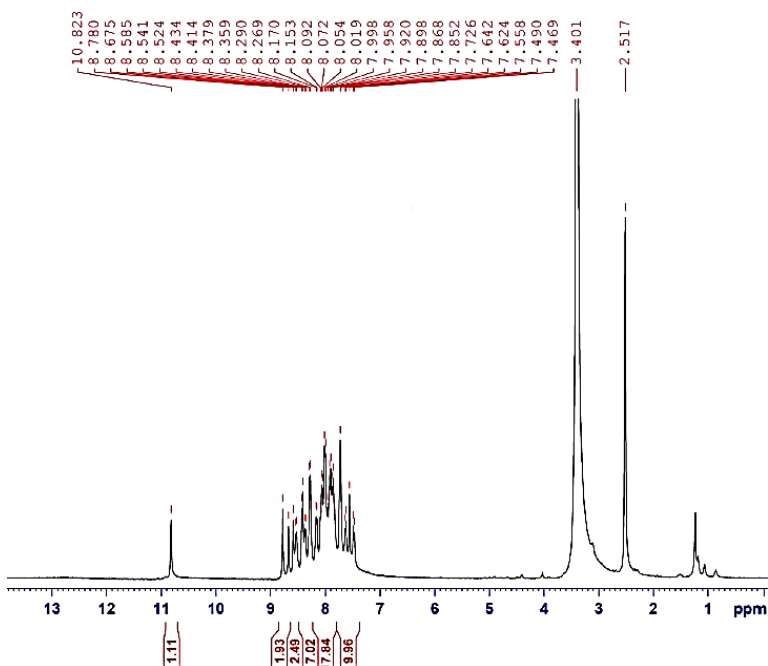

<sup>1</sup>H NMR spectrum of **3e**

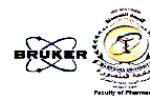

Current Data Parameters  
 NAME Ayo elawil 43x -M protor  
 EXPNO 10  
 PROCNO 1  
 F2 - Acquisition Parameters  
 Date\_ 20191117  
 Time\_ 9.04 h  
 INSTRUM spect  
 FPROBHD z108618\_0945 4  
 PULPROG zg30  
 TD 65536  
 SOLVENT DMF0  
 NS 16  
 DS 2  
 SWH 8012.820 Hz  
 FIDRES 0.244532 Hz  
 AQ 4.0854465 sec  
 RG 120.93  
 DW 62.400 usec  
 DE 6.50 usec  
 TE 293.3 K  
 D1 1.09000000 sec  
 TDO 1  
 SFO1 400.2024712 MHz  
 NUC1 1H  
 P1 13.50 usec  
 PLW1 13.09000000 W  
 F2 - Processing parameters  
 SI 65536  
 SF 400.2009000 MHz  
 NRG EM  
 SSB 0  
 LB 0.30 Hz  
 GB 0  
 PC 1.00

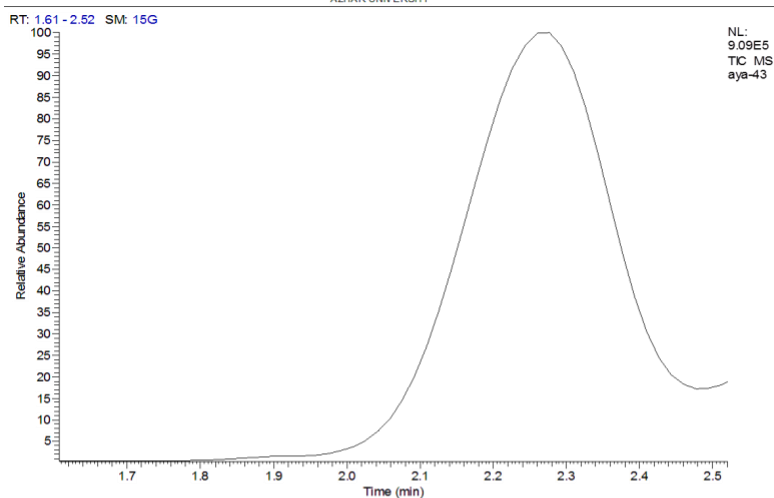

aya-43 #249 RT: 4.18 AV: 1 SB: 2 4.55, 4.57 NL: 3.47E2  
T: [0.0] + c EI Full ms [40.00-1000.00]

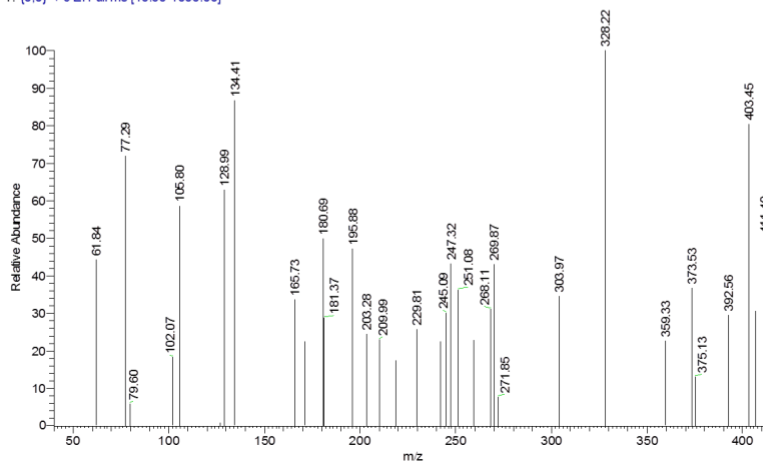

Mass spectrum of 3e

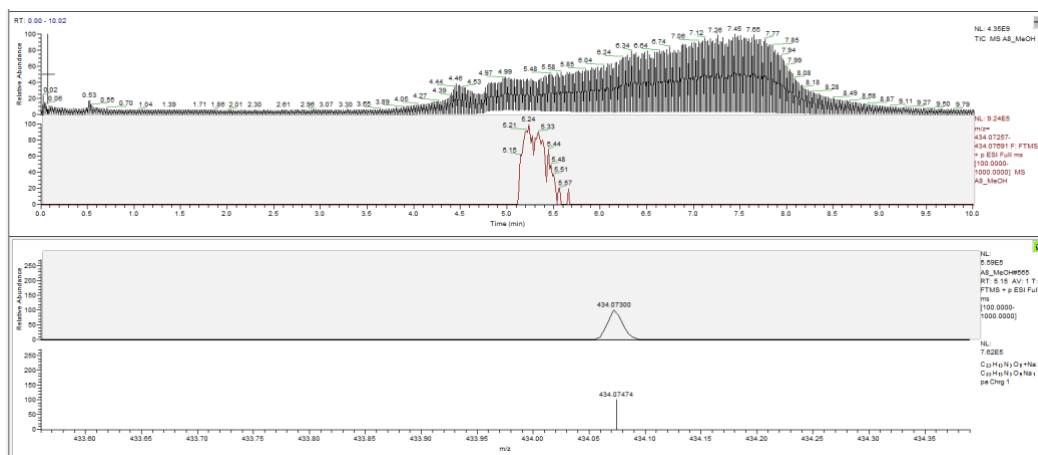

HR-MS spectrum of 3e

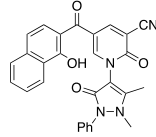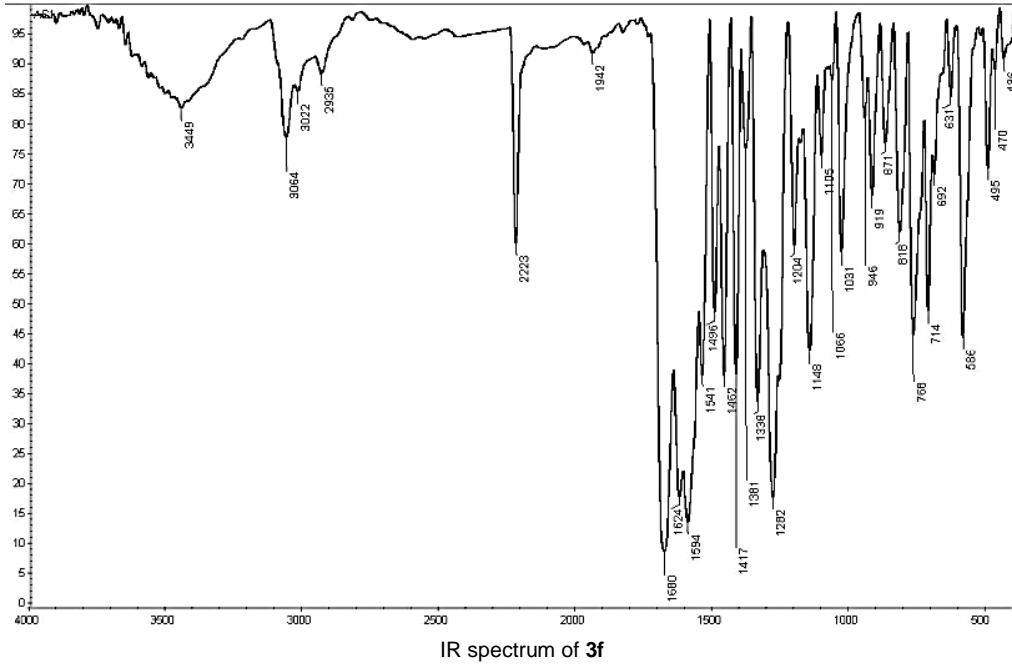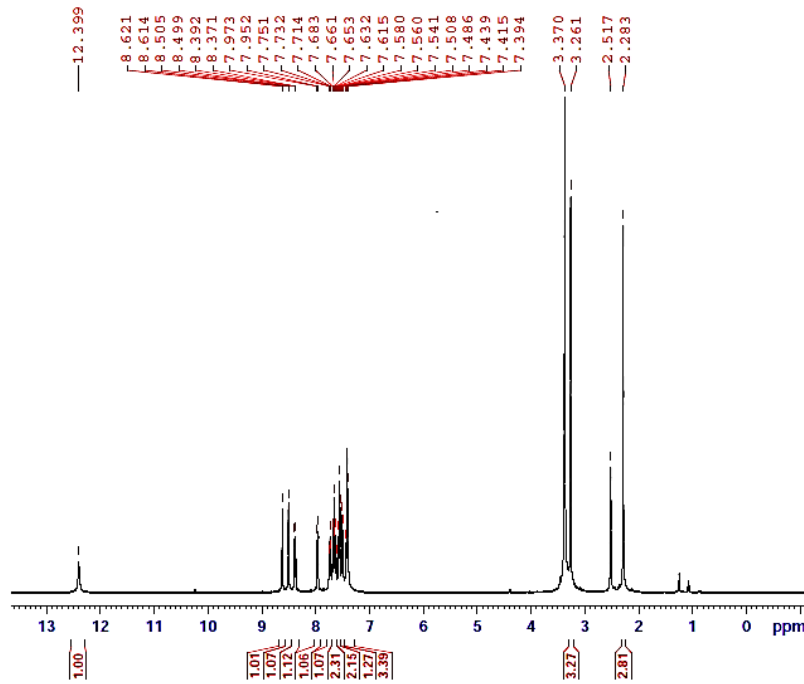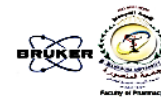

Current Data Parameters  
 NAME: aya atef ASL -M prot  
 SIDNO: 10  
 PROCNO: 1

F2 - Acquisition Parameters  
 Date\_: 20191020  
 Time: 13.05 h  
 INSTRUM: spect  
 PROBHD: Z108618\_0945 ( )  
 PULPROG: zg30  
 TD: 65536  
 SOLVENT: DMSO  
 NS: 16  
 DS: 2  
 SWH: 8012.820 MHz  
 FIDRES: 0.244532 MHz  
 AQ: 4.0894465 sec  
 RG: 176.72  
 DM: 62.400 usec  
 DE: 8.50 usec  
 TE: 284.2 K  
 D1: 1.00000000 sec  
 TDO: 1  
 SFO1: 400.2024712 MHz  
 NUCL1: 1H  
 P1: 13.50 usec  
 PLW1: 13.00000000 W

F2 - Processing parameters  
 SI: 65536  
 SF: 400.2000000 MHz  
 WDW: EM  
 SSB: 0  
 LB: 0.30 Hz  
 GB: 0  
 PC: 1.00

RT: 1.30 - 3.92 SM: 15G

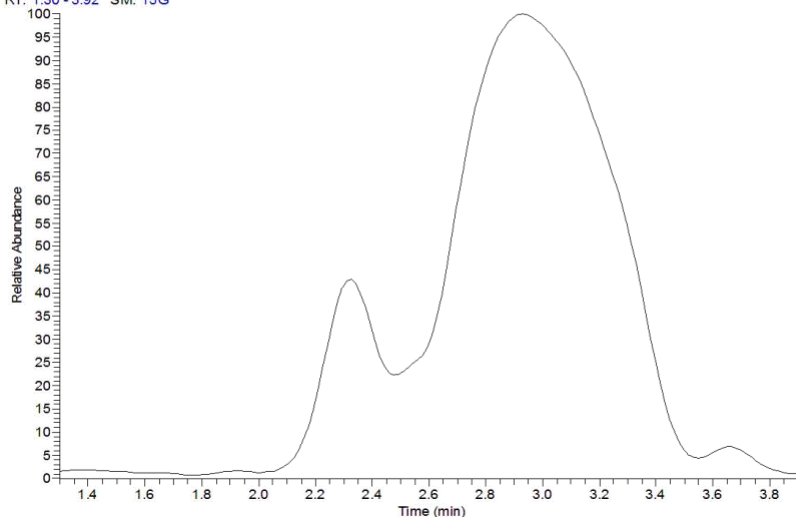

NL:  
1.57E6  
TIC MS  
aya-as1

aya-as1 #114 RT: 1.92 AV: 1 SB: 2 4.49, 4.49 NL: 6.64E2  
T: {0,0} + c EI Full ms [40.00-1000.00]

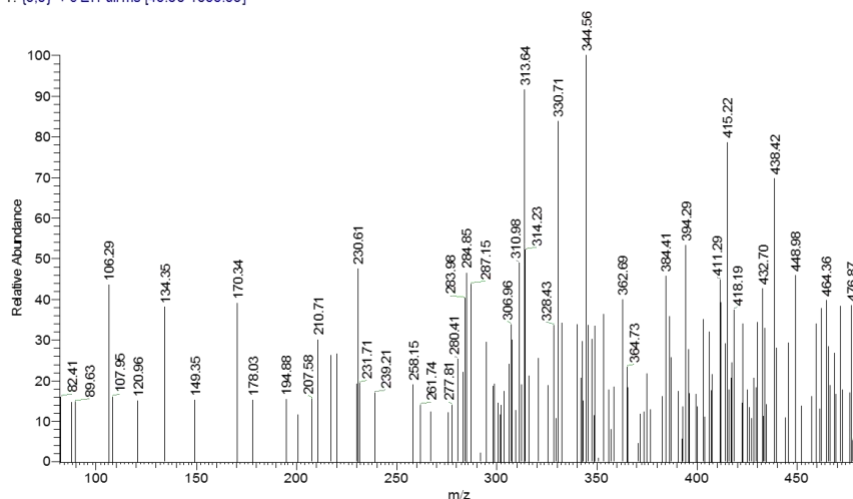

Mass spectrum of 3f

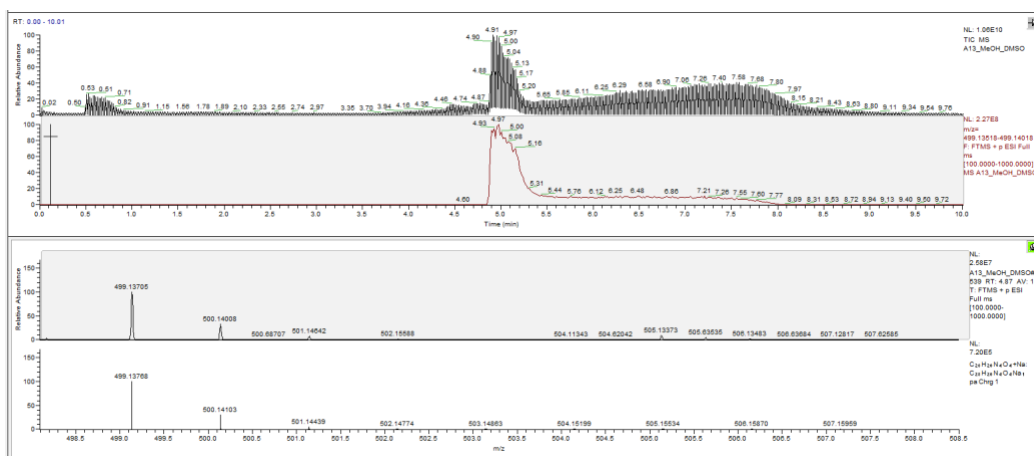

HR-MS spectrum of 3f

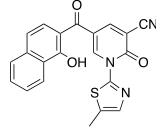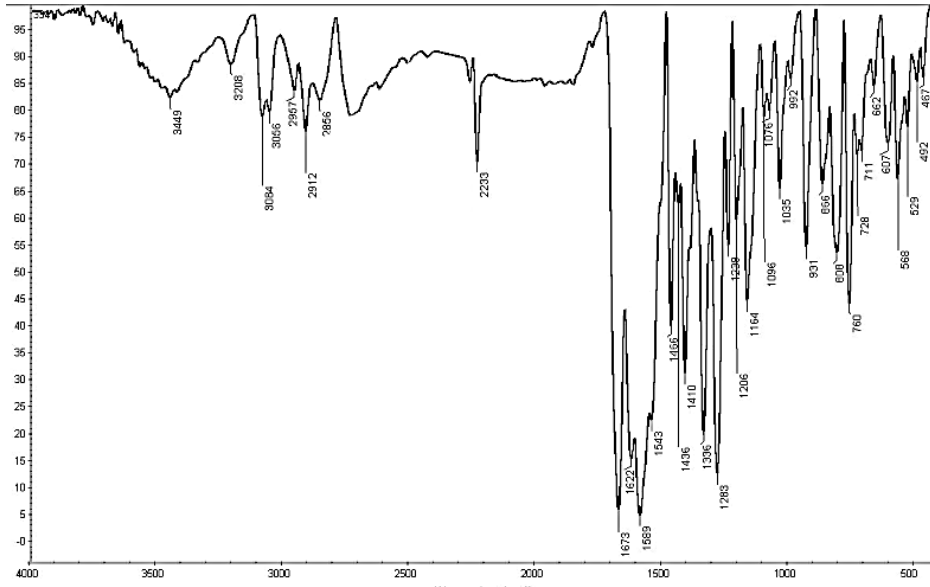

IR spectrum of 3g

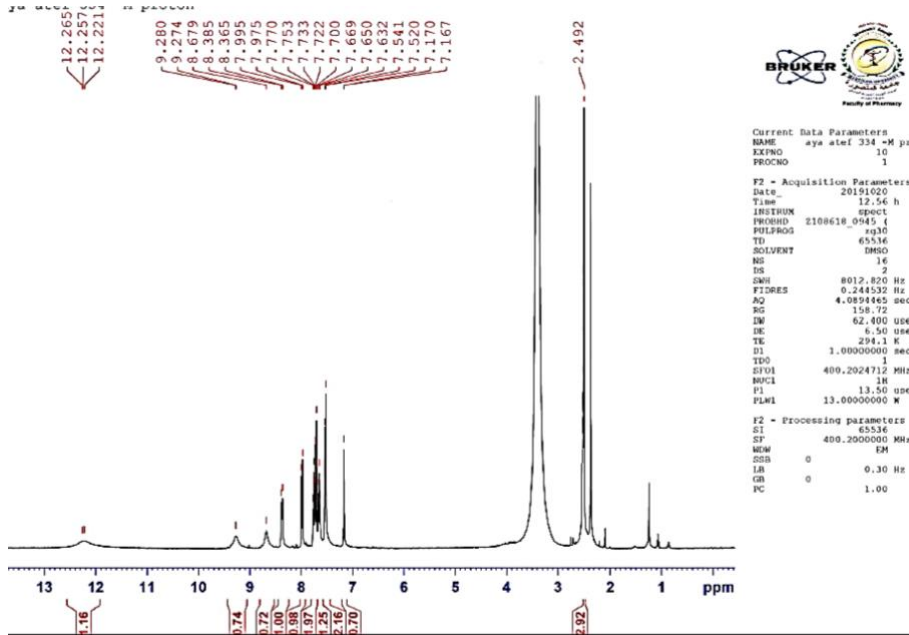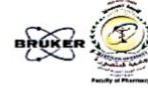

Current Data Parameters  
 NAME aya atef 334 -M prot  
 XXPR0 10  
 PROCNO 1  
 F2 - Acquisition Parameters  
 Date 20191020  
 Time 12.56 h  
 INSTRUM spect  
 PROBRD E108618 0545 ( )  
 PULPROG zg30  
 TD 65536  
 SOLVENT DMSO  
 NS 16  
 DS 2  
 SWS 8012.820 Hz  
 FIDRES 0.244532 Hz  
 AQ 4.0894445 sec  
 RG 158.72  
 IM 82.400 usec  
 DE 6.50 usec  
 TE 294.1 K  
 D1 1.0000000 sec  
 TPO 1  
 SFO1 400.2024712 MHz  
 NUC1 1H  
 P1 13.50 usec  
 PL1 13.0000000 Hz  
 F2 - Processing parameters  
 SI 65536  
 SF 400.2000000 MHz  
 NEX 1H  
 SSB 0  
 LB 0.30 Hz  
 GB 0  
 PC 1.00

<sup>1</sup>H NMR spectrum of 3g

RT: 2.76 - 3.37 SM: 15G

NL:  
2.17E4  
TIC MS  
aya-334

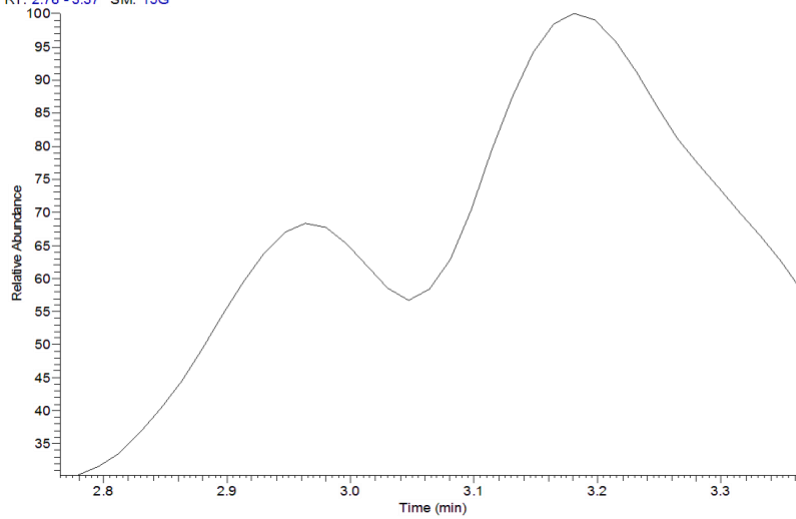

aya-334 #221 RT: 3.72 AV: 1 SB: 2 4.50, 4.50 NL: 2.76E2  
T: (0,0) + c EI Full ms [40.00-1000.00]

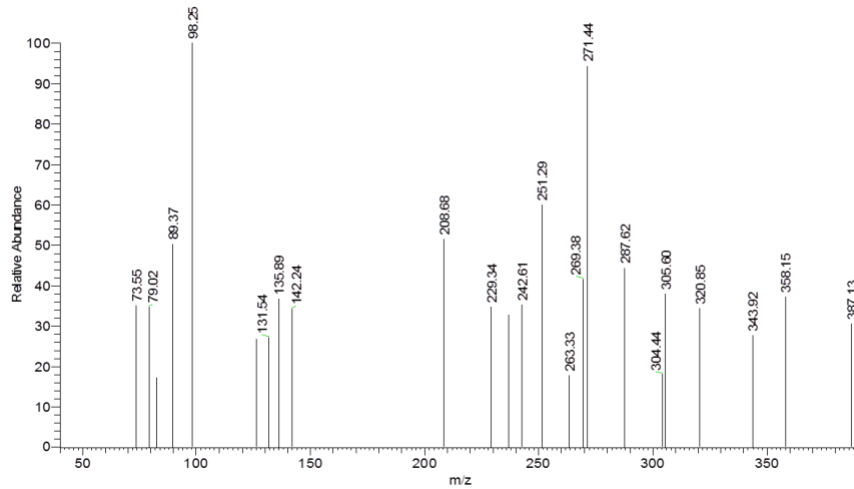

Mass spectrum of 3g

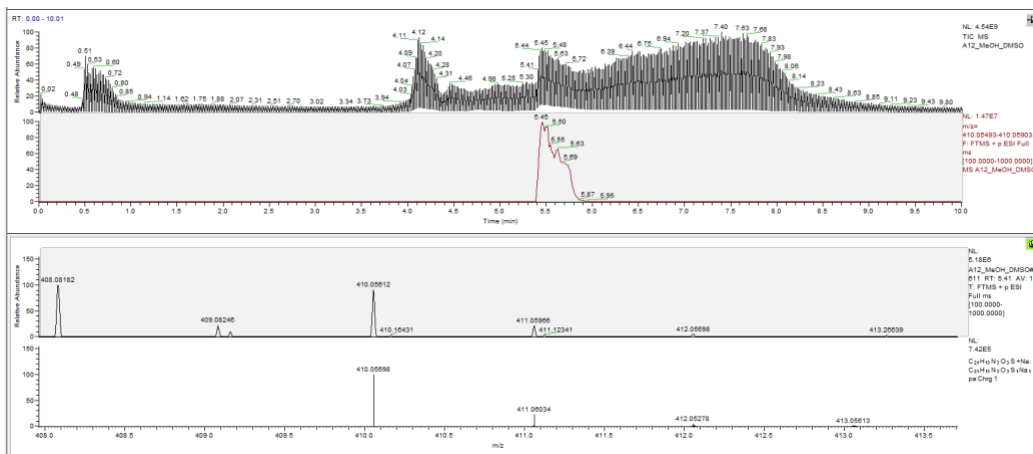

HR-MS spectrum of 3g



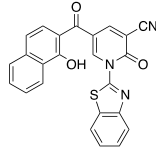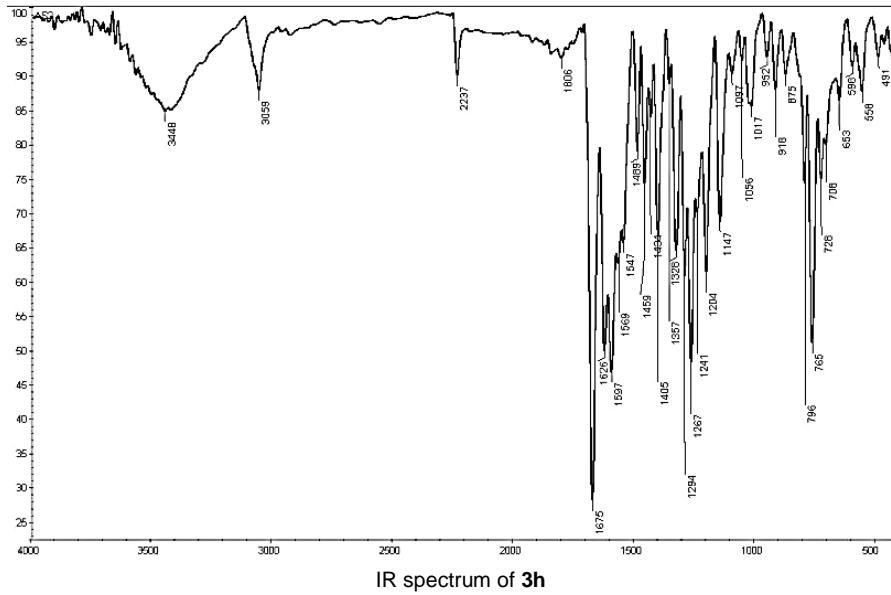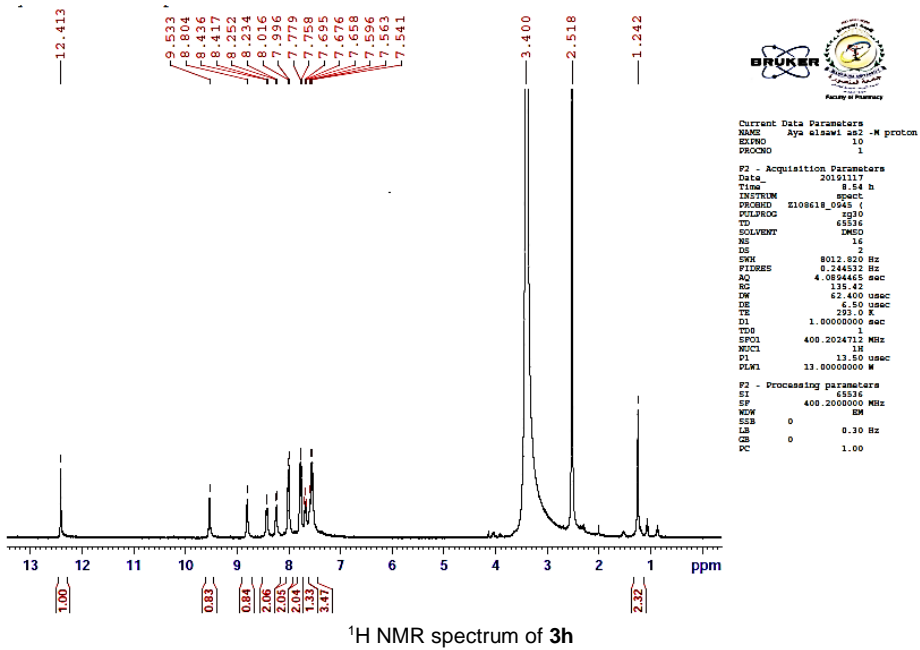

RT: 0.00 - 3.78 SM: 15G

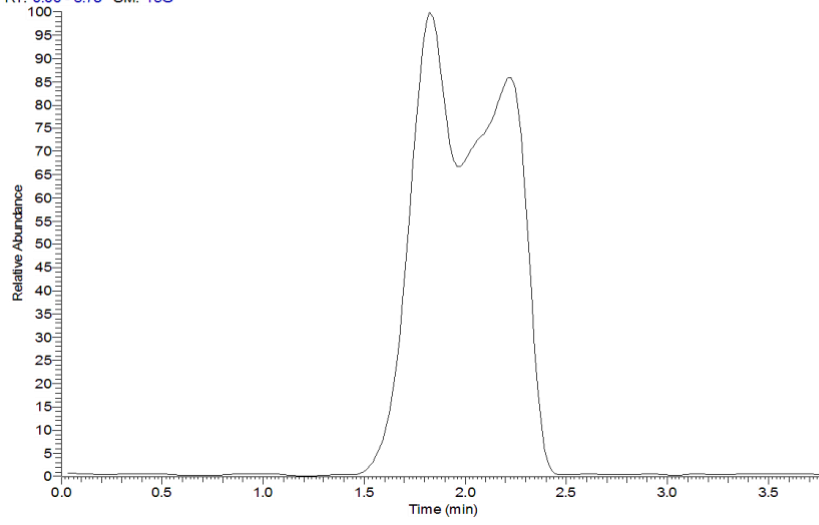

NL:  
3.74E6  
TIC MS  
aya-as2

aya-as2 #83 RT: 1.41 AV: 1 SB: 2 3.78, 3.78 NL: 4.82E2  
T: (0,0) + c EI Full ms [40.00-1000.00]

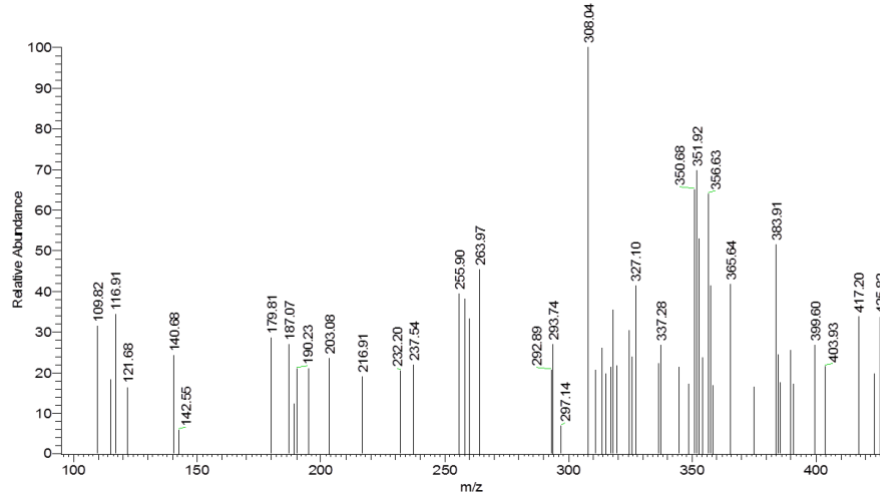

Mass spectrum of 3h

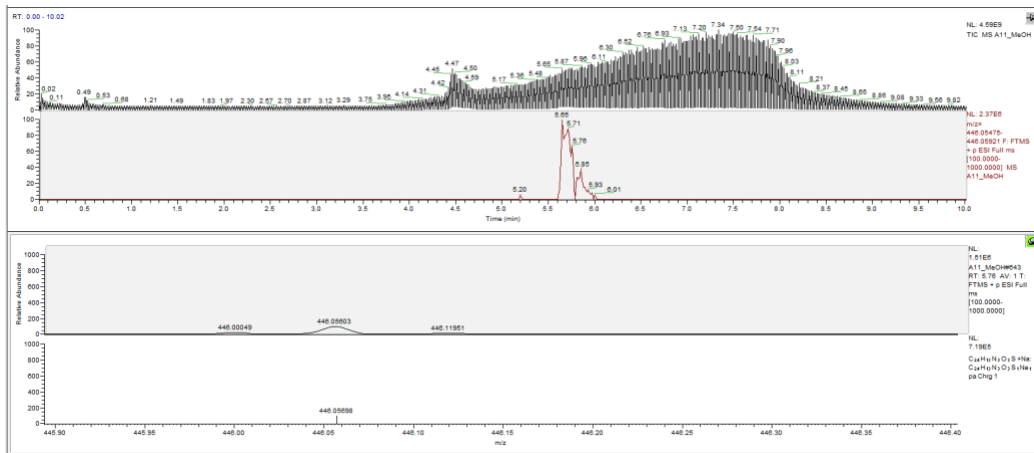

HR-MS spectrum of 3h

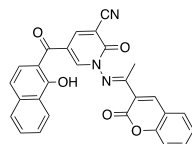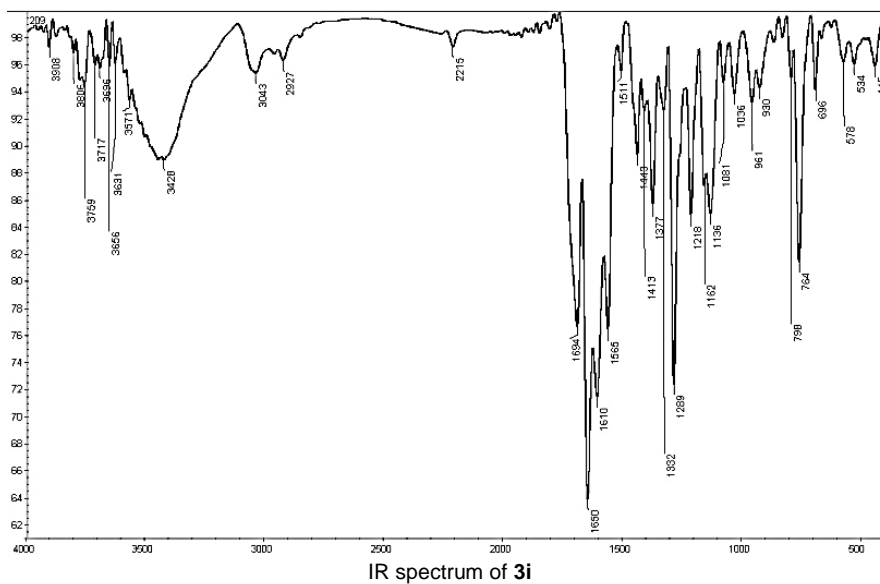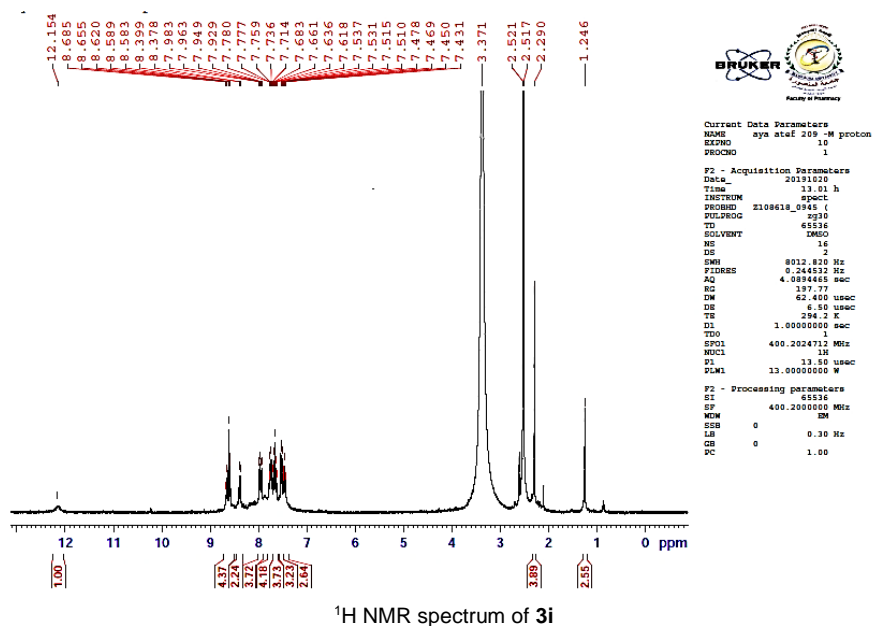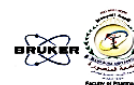

Current Data Parameters  
 NAME: aya atef 209 -M proton  
 RECORD: 10  
 PROCESS: 1

F2 - Acquisition Parameters  
 Date\_: 20191020  
 Time: 13:01 h  
 INSTRUM: spect  
 FREQID: 2108618\_0145\_1  
 PULPROG: zg30  
 TD: 65536  
 SOLVENT: DMSO  
 NS: 2  
 DS: 2  
 SWH: 8012.820 Hz  
 FIDRES: 0.244532 Hz  
 AQ: 4.0894465 sec  
 RG: 197.77  
 DW: 62.400 usec  
 DE: 6.50 usec  
 TE: 298.2 K  
 D1: 1.00000000 sec  
 TSD: 1  
 SFO1: 400.2024712 MHz  
 NUC1: 1H  
 P1: 13.50 usec  
 PL1: 13.00000000 W

F2 - Processing parameters  
 SI: 65536  
 SF: 400.2000000 MHz  
 MDW: DM  
 SSB: 0  
 LB: 0.30 Hz  
 GB: 0  
 PC: 1.00

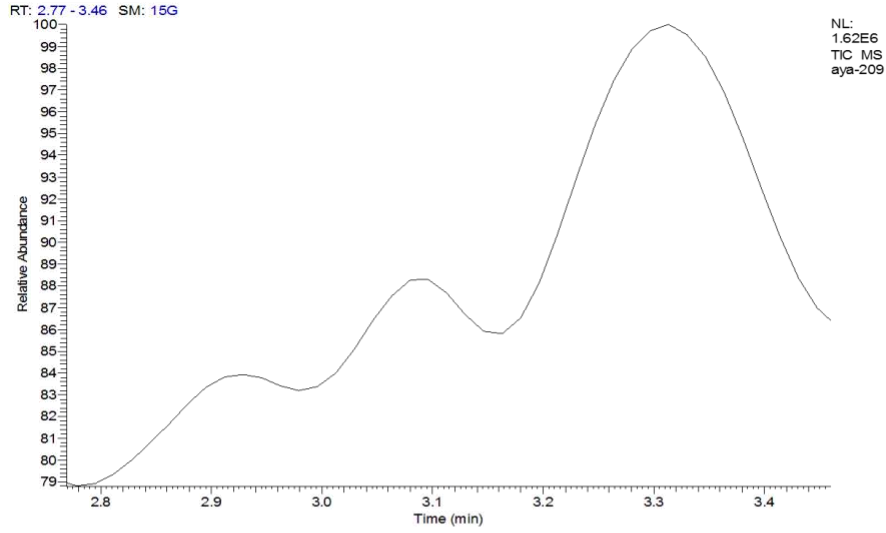

aya-209 #219 RT: 3.68 AV: 1 NL: 5.22E4  
T: (0,0) + c EI Full ms [40.00-1000.00]

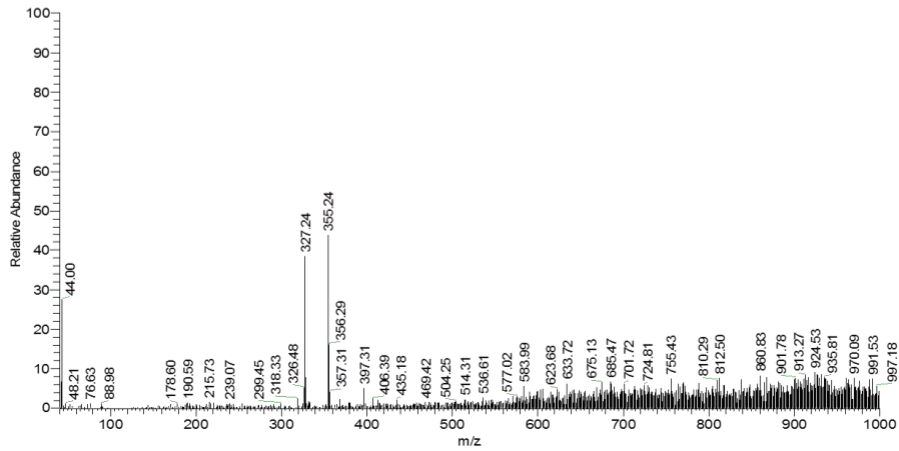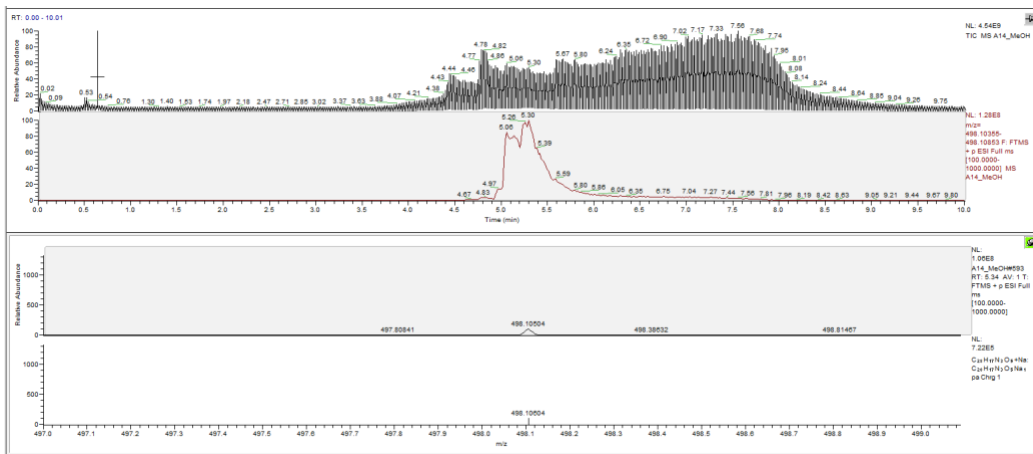

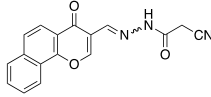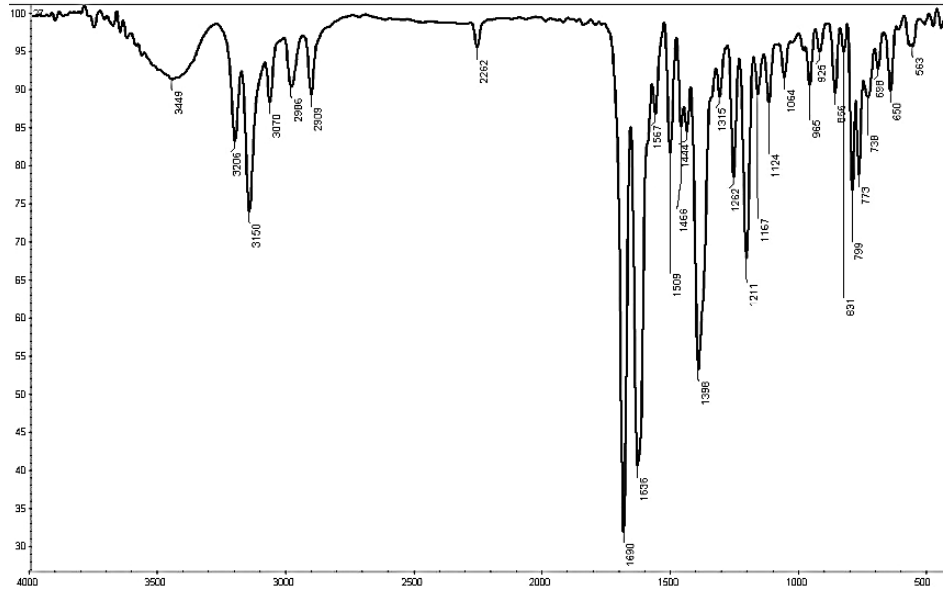

IR spectrum of 5

EX-AYA-33  
 PROTON DMSO (C:\data) nmr 17

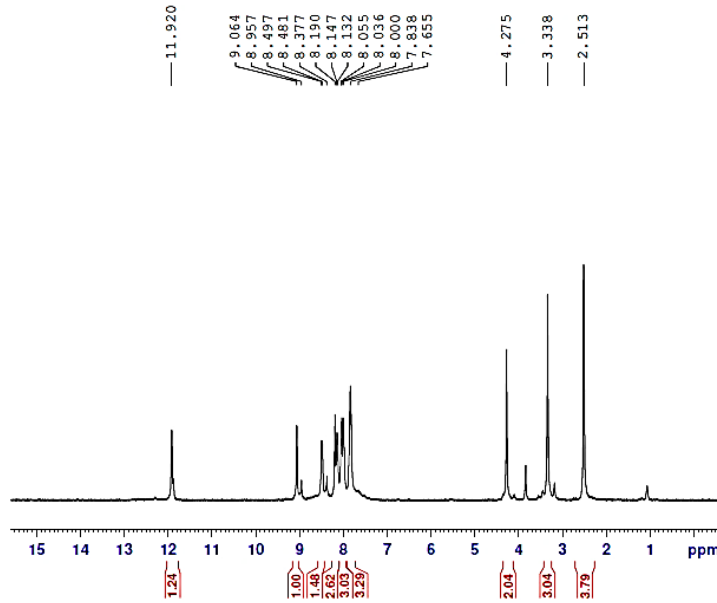

<sup>1</sup>H NMR spectrum of 5

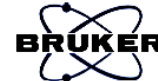

```

Current Data Parameters
NAME      Apr29-2018-nmr
EXPNO    80
PROCNO   1

F2 - Acquisition Parameters
Date_    20180429
Time     15.20
INSTRUM  spect
PROBHD   5 mm PABBO BB/
PULPROG  zgpg30
TD        65536
SOLVENT  DMSO
NS        16
DS        2
SWH       8012.820 Hz
FIDRES    0.122266 Hz
AQ        4.0894465 sec
RG        205.44
CW        62.400 usec
DE        6.50 usec
TE        298.2 K
D1        1.00000000 sec
TD0       1

===== CHANNEL f1 =====
SFO1     400.1324710 MHz
NUC1     1H
P1       10.00 usec
PLW1     16.00000000 W

F2 - Processing parameters
SI       65536
SF       400.1300000 MHz
WDW      EM
SSB      0
GB       0
PC       1.00
  
```

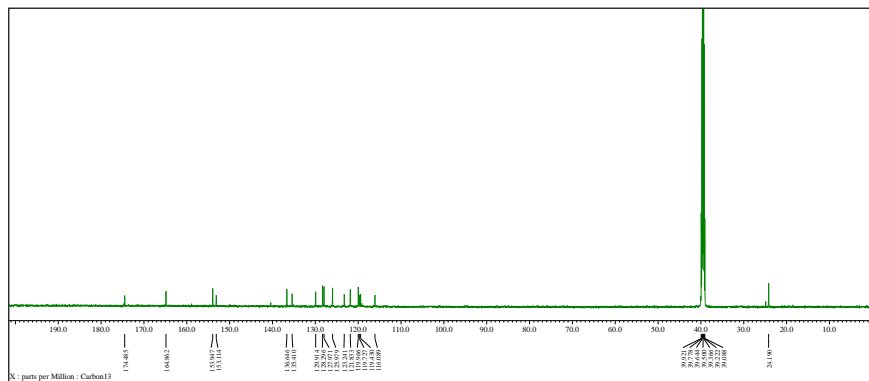

13C NMR spectrum of 5

C:\xcalibur\data\S1aya-33

27-Nov-18 1:07:41 PM  
THE REGIONAL CENTER FOR MYCOLOGY AND BIOTECHNOLOGY  
AZHAR UNIVERSITY

RT: 3.28 - 5.35 SM: 15G

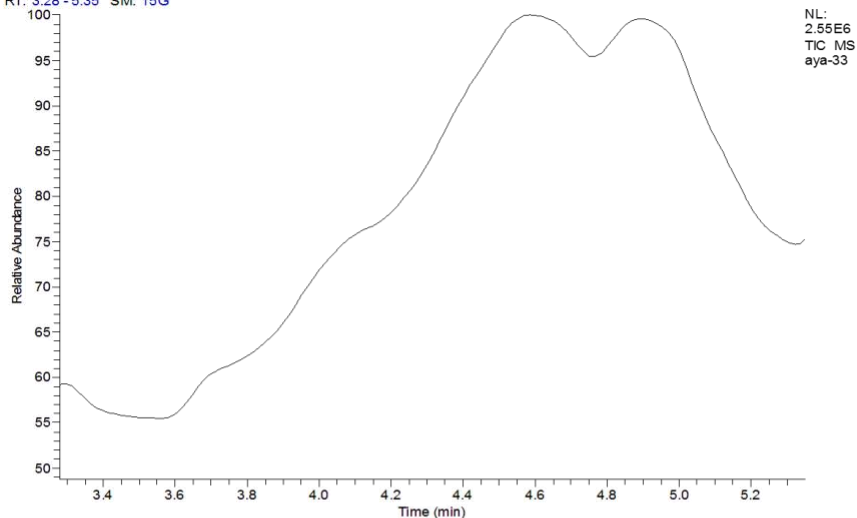

aya-33 #210 RT: 3.53 AV: 1 NL: 5.48E4  
T: {0,0} + c EI Full ms [40.00-1000.00]

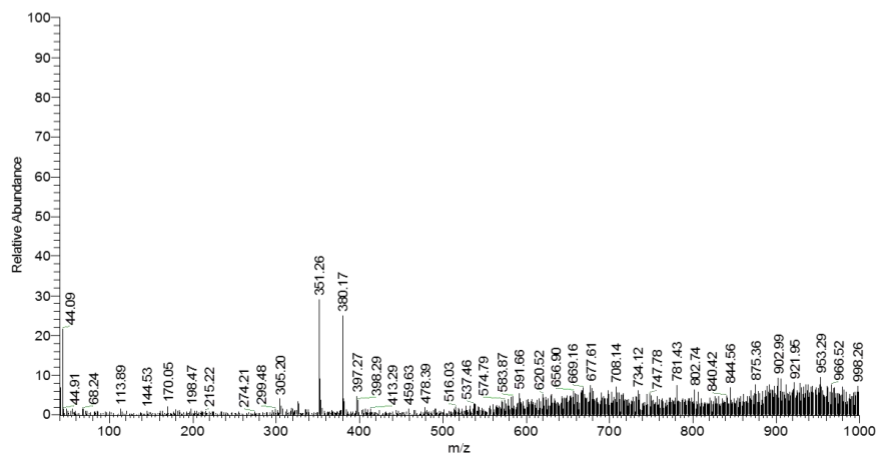

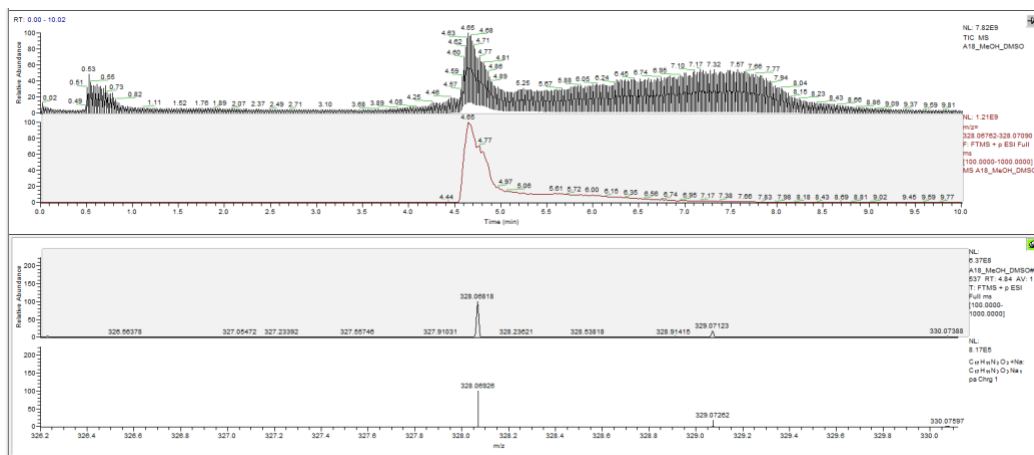

HR-MS spectrum of 5

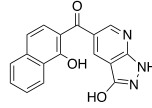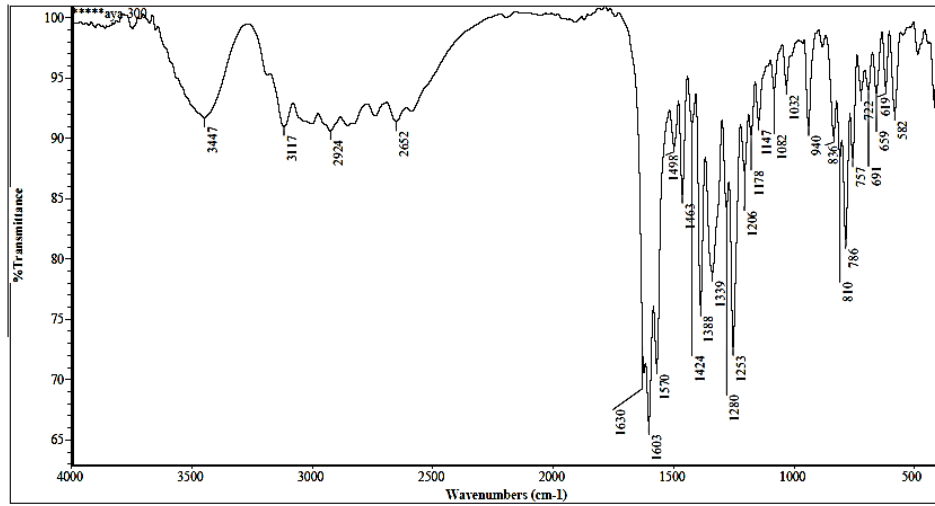

\*\*\*\*aya-300

Number of sample scans: 32  
 Number of background scans: 32  
 Resolution: 4.000  
 Sample gain: 2.0  
 Optical velocity: 0.4747  
 Aperture: 80.00

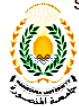

Sun Apr 07 10:55:03 2019 (GMT+02:00)

**ThermoFisher**  
 SCIENTIFIC

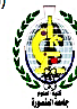

Mansoura University  
 Faculty of Science  
 Spectral Analyses unit  
 Chemistry Department  
 ThermoFisher Nicolette IS10, USA  
 Spectral range: 4000 - 400 cm-1

IR spectrum of 6

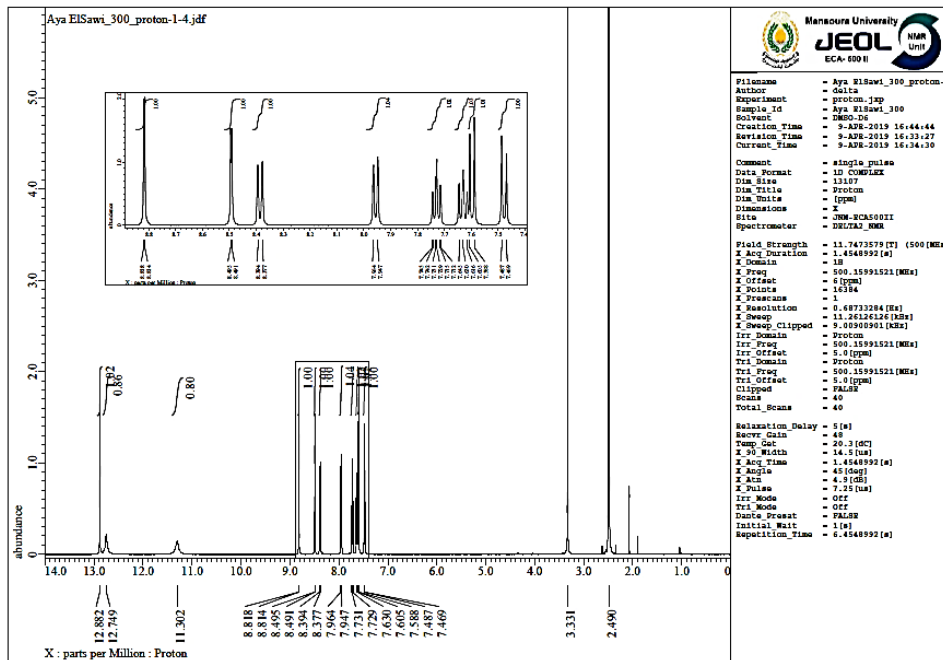

<sup>1</sup>H NMR spectrum of 6



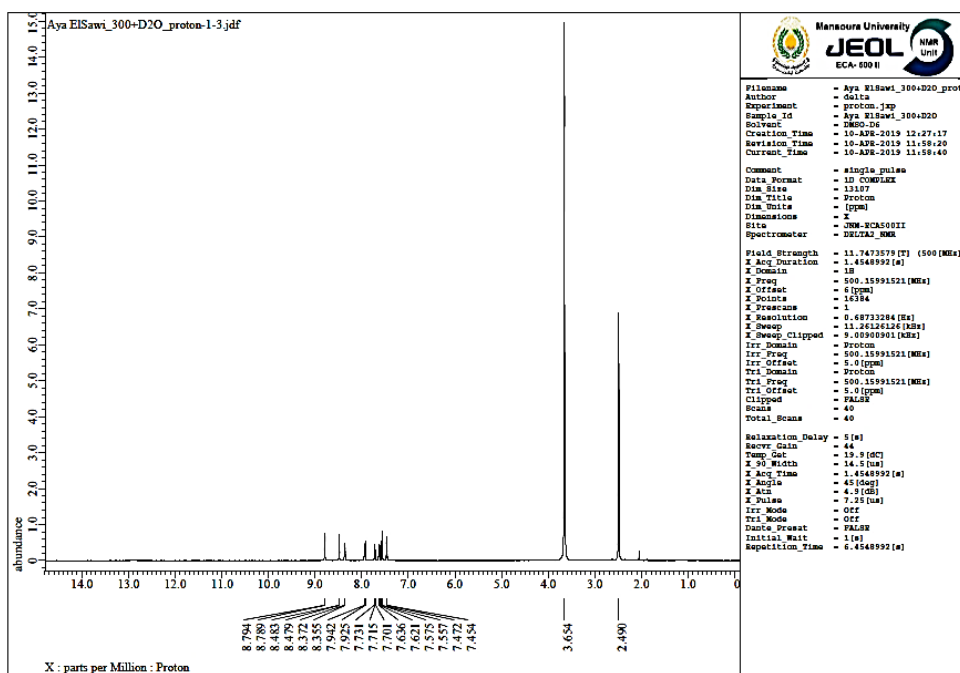

<sup>1</sup>H NMR spectrum of **6** in the presence of D<sub>2</sub>O

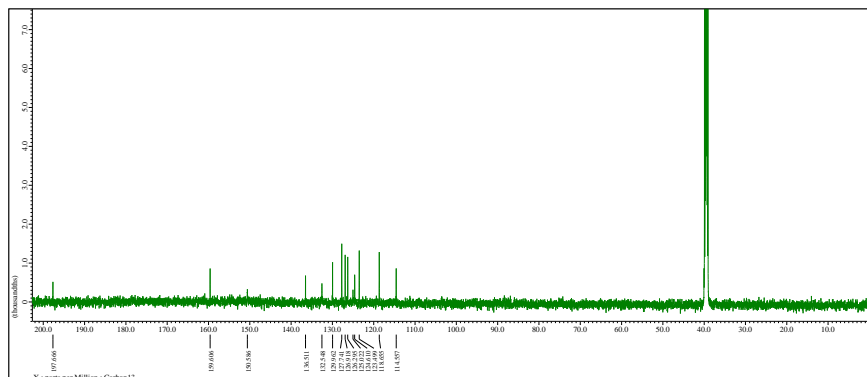

<sup>13</sup>C NMR spectrum of **6**

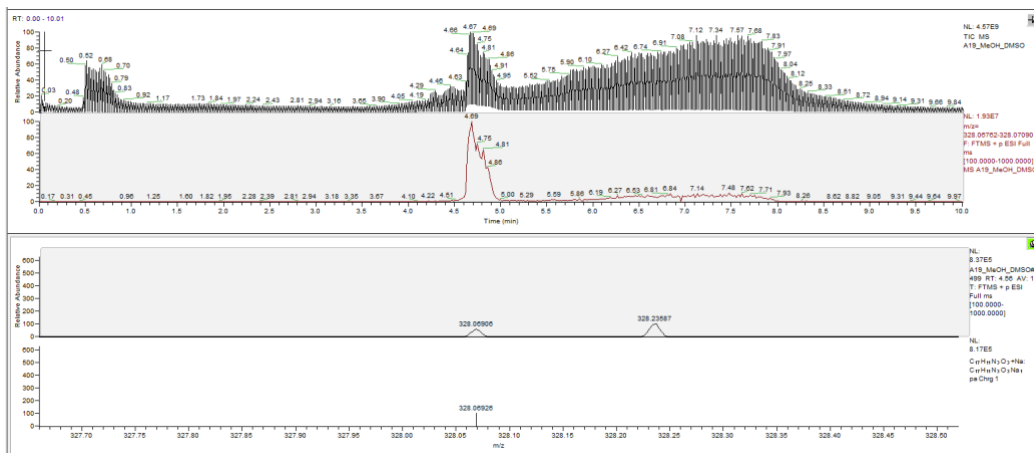

HR-MS spectrum of **6**

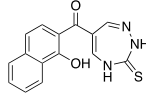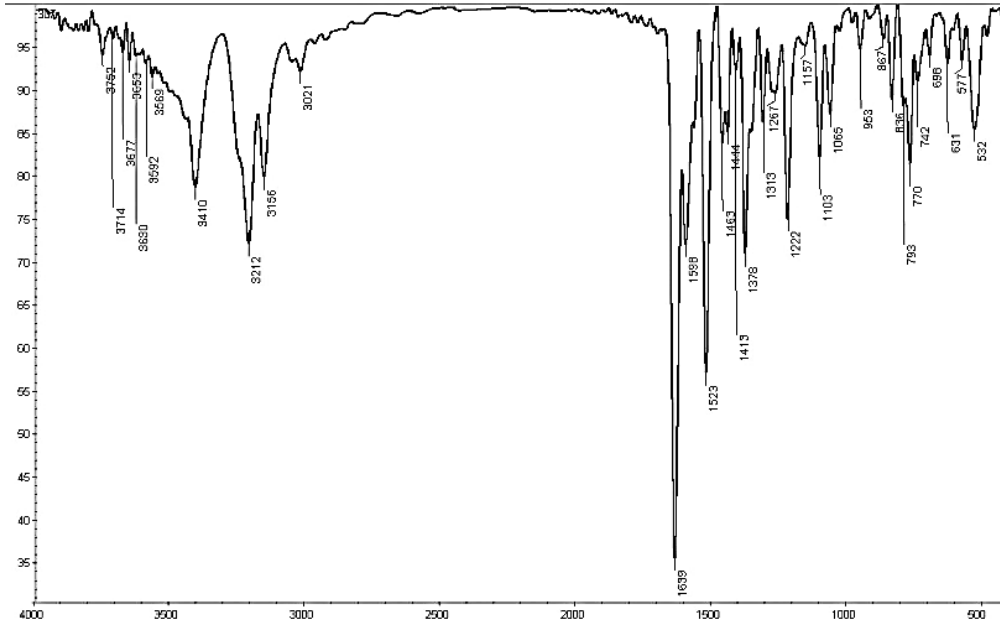

IR spectrum of 7

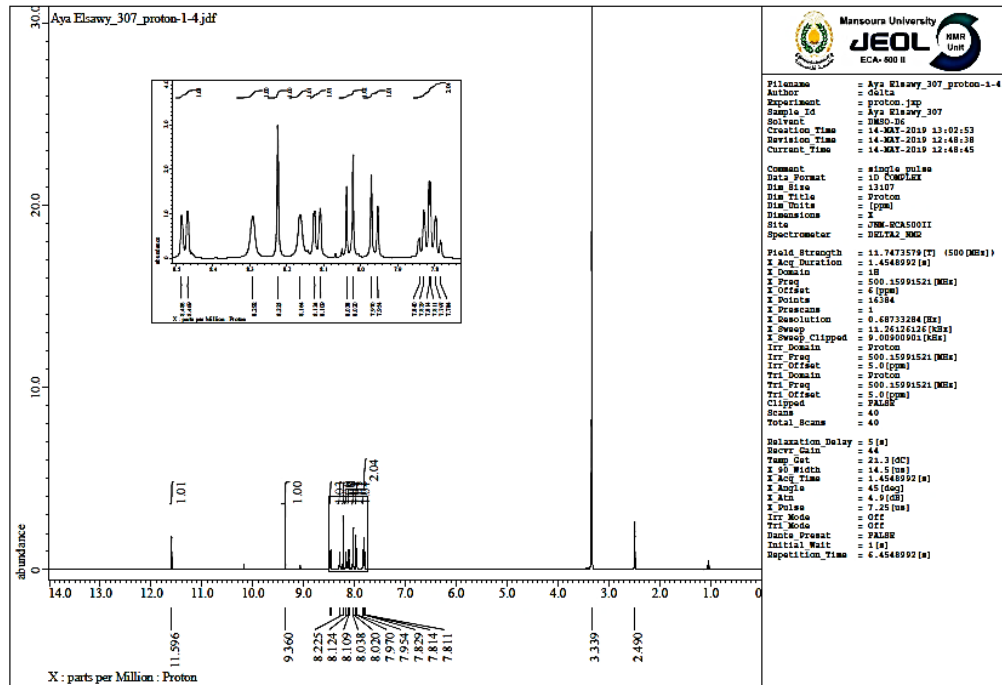

<sup>1</sup>H NMR spectrum of 7



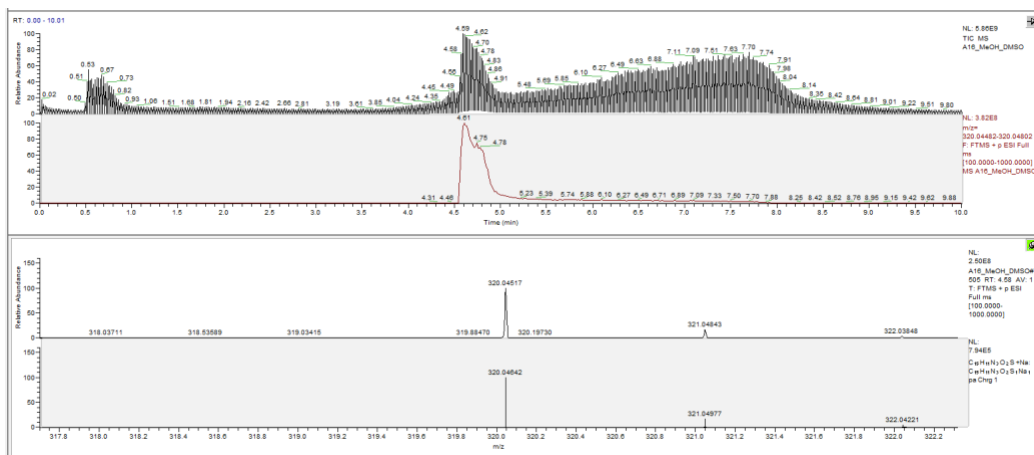

HR-MS spectrum of 7

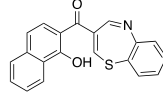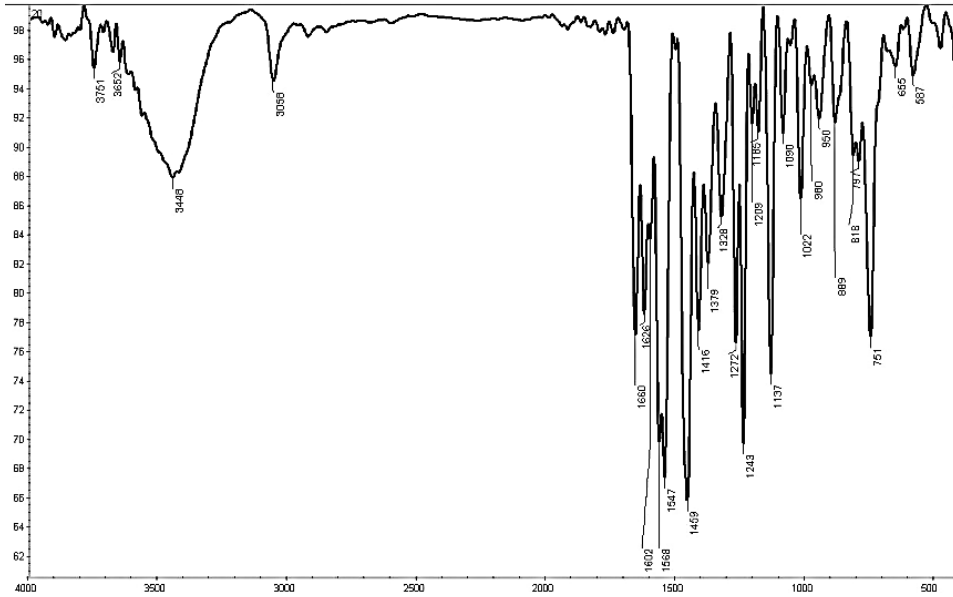

IR spectrum of 8

AYA-20  
 PROTON\_BSU CDC13 (C:\data) abeer 2

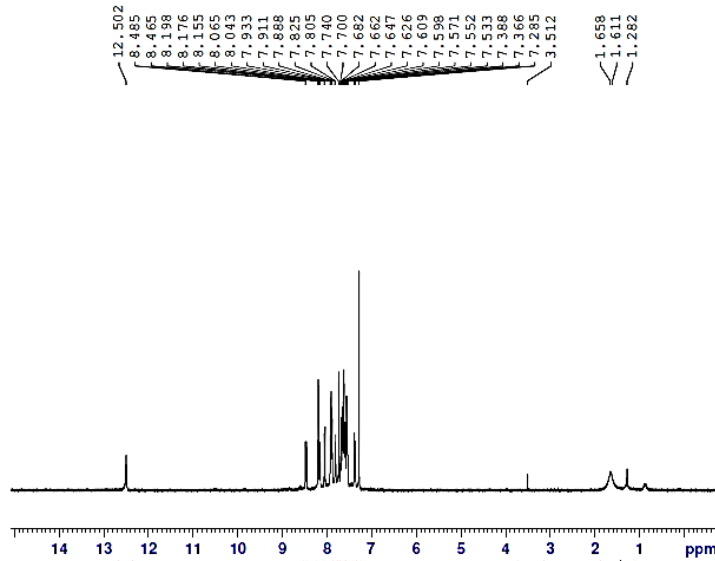

<sup>1</sup>H NMR spectrum of 8

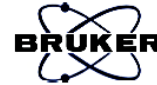

Current Data Parameters  
 NAME May03-2018-abeer  
 EXPNO 100  
 PROCNO 1

F2 - Acquisition Parameters  
 Date\_ 20180303  
 Time 10.16  
 INSTRUM spect  
 PROBHD 5 mm PABBO BBI/  
 PULPROG zg30  
 TD 65536  
 SOLVENT cdcl3  
 NS 16  
 DS 2  
 SWH 8012.820 Hz  
 FIDRES 0.122266 Hz  
 AQ 4.0894465 sec  
 RG 147.93  
 EW 62.400 usec  
 DE 6.50 usec  
 TE 298.1 K  
 D1 1.00000000 sec  
 TDD 1

==== CHANNEL f1 =====  
 SFO1 400.1324710 MHz  
 NUC1 1H  
 P1 10.00 usec  
 PLW1 16.00000000 W

F2 - Processing parameters  
 SI 65536  
 SF 400.1300000 MHz  
 WDW EM  
 SSB 0  
 LB 0.10 Hz  
 GB 0  
 PC 1.00



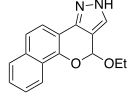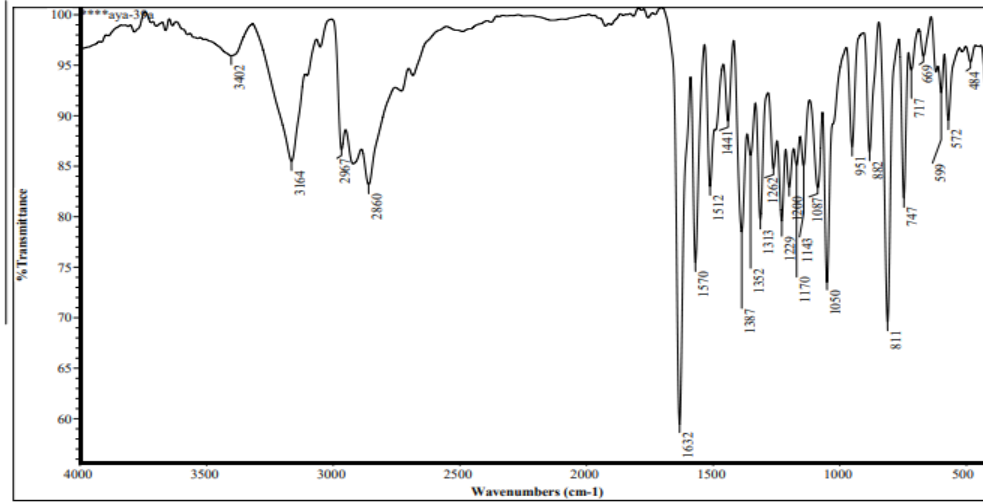

\*\*\*\*aya-39a  
 Number of sample scans: 32  
 Number of background scans: 32  
 Resolution: 4.000  
 Sample gain: 2.0  
 Optical velocity: 0.4747  
 Aperture: 80.00

Tue Apr 17 12:07:45 2018 (GMT-07:00)

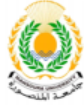

**ThermoFisher**  
 SCIENTIFIC

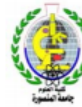

Mansoura University  
 Faculty of Science  
 Spectral Analyses unit  
 Chemistry Department  
 ThermoFisher Nicolette IS10, USA  
 Spectral range: 4000 - 400 cm-1

IR spectrum of 10

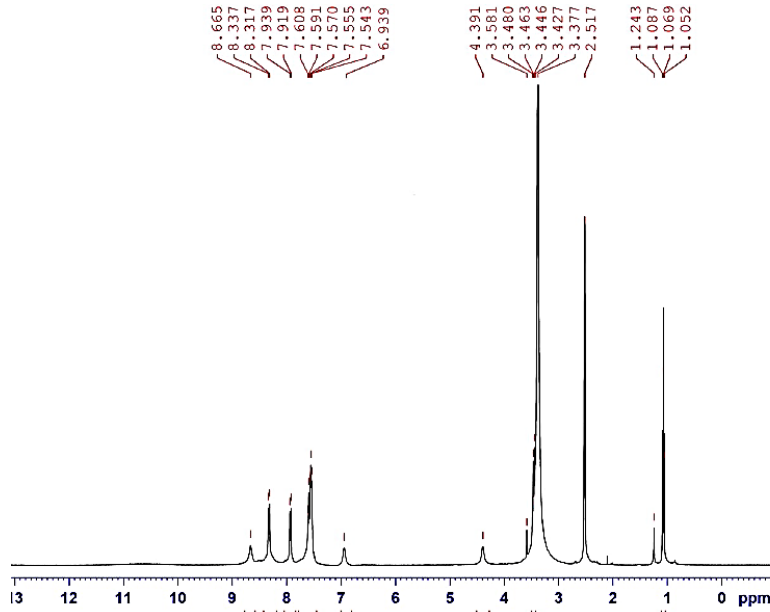

<sup>1</sup>H NMR spectrum of 10

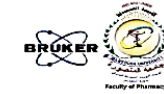

Current Data Parameters  
 NAME aya atel 39a -M proton  
 EXPNO 10  
 PROCNO 1  
 F2 - Acquisition Parameters  
 Date\_ 2019020  
 Time 12.51 h  
 INSTRUM spect  
 FREQHHD 2108618 0945 (1  
 PULPROG zg30  
 TD 65536  
 SOLVENT DMSO  
 NS 16  
 DS 2  
 SWH 8012.820 Hz  
 FIDRES 0.244532 Hz  
 AQ 4.0394465 sec  
 RG 197.77  
 DW 62.400 usec  
 DE 4.50 usec  
 TE 294.0 K  
 TD 1.0000000 sec  
 TSD 1  
 SF01 400.2024712 MHz  
 NUCL 1H  
 PI 13.50 usec  
 PLML 13.0000000 W  
 F2 - Processing parameters  
 SI 65536  
 SF 400.2000000 MHz  
 MW EM  
 SSB 0  
 LB 0.30 Hz  
 GB 0  
 PC 1.00

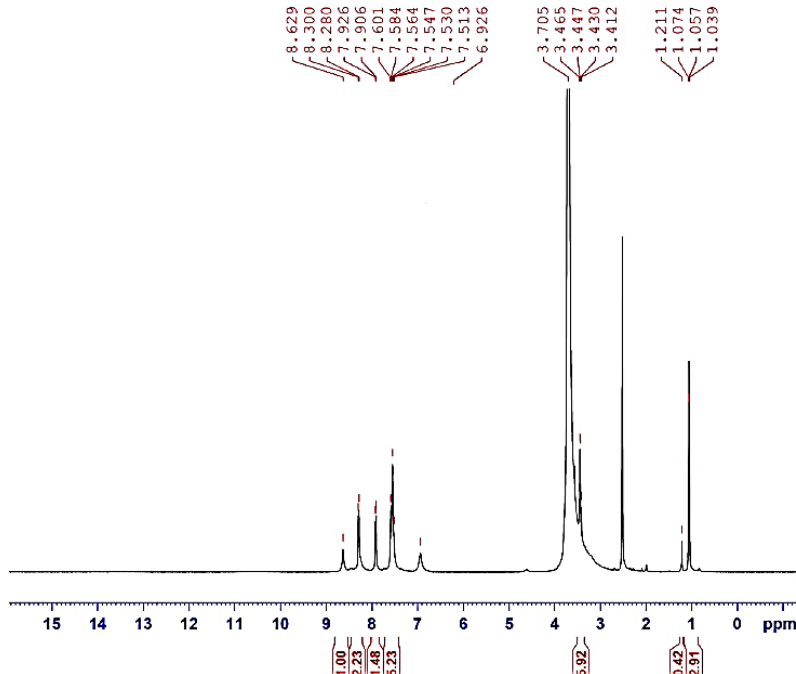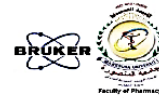

Current Data Parameters  
 NAME Aya aya-39a -H<sub>2</sub>O -dss-  
 EXFNO 10  
 PROCNO 1

F2 - Acquisition Parameters  
 Date 20191103  
 Time 11.19 h  
 INSTRUM spect  
 PROGRAM 2109619\_0919 ( )  
 PULPROG zg30  
 TD 65536  
 SOLVENT DMSO  
 NS 16  
 DS 2  
 SFO 8012.820 Hz  
 FIDRES 0.244532 Hz  
 AQ 4.0894465 sec  
 RG 80.52  
 DF 62.400 usec  
 DE 6.50 usec  
 TE 298.4 K  
 DL 1.00000000 sec  
 TDO 1  
 SFO1 400.2024712 MHz  
 NUC1 1H  
 PI 13.50 usec  
 PL1 13.0000000 w

F2 - Processing parameters  
 SI 65536  
 SF 400.2000800 MHz  
 SFR 80  
 SSB 0  
 LB 0.30 Hz  
 GB 0  
 PC 1.00

<sup>1</sup>H NMR spectrum of compound 10 in the presence of D<sub>2</sub>O

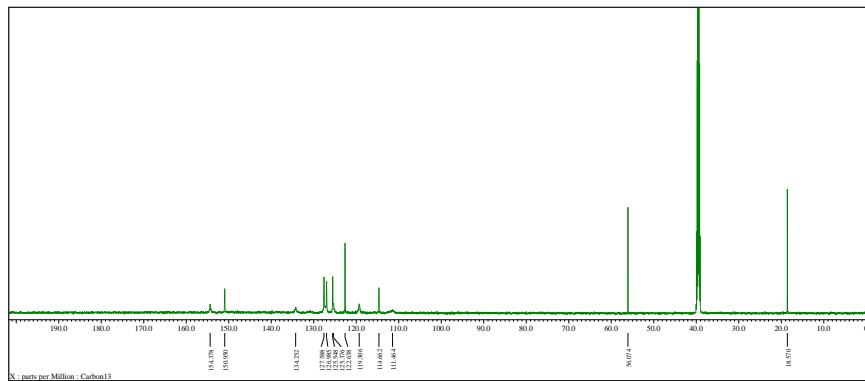

<sup>13</sup>C NMR spectrum of 10

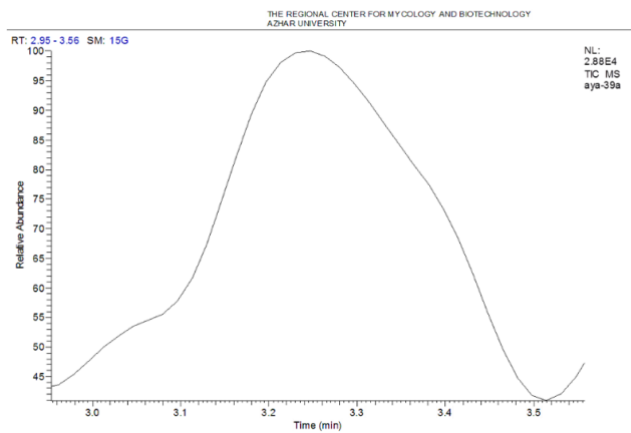



eye-39e #213 RT: 3.58 AV: 1 SB: 2 4.43, 4.43 NL: 3.63E2  
 T: (0,0) + c EI Full ms [40.00-1000.00]

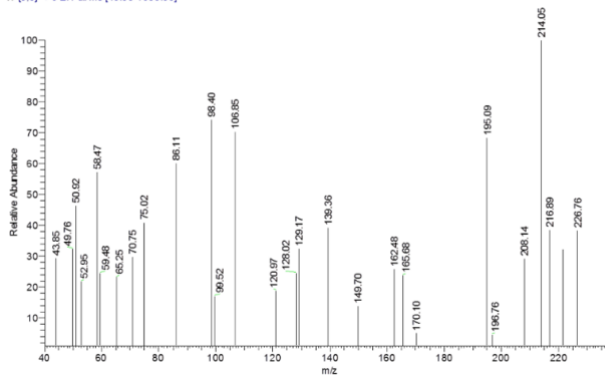

Mass spectrum of 10

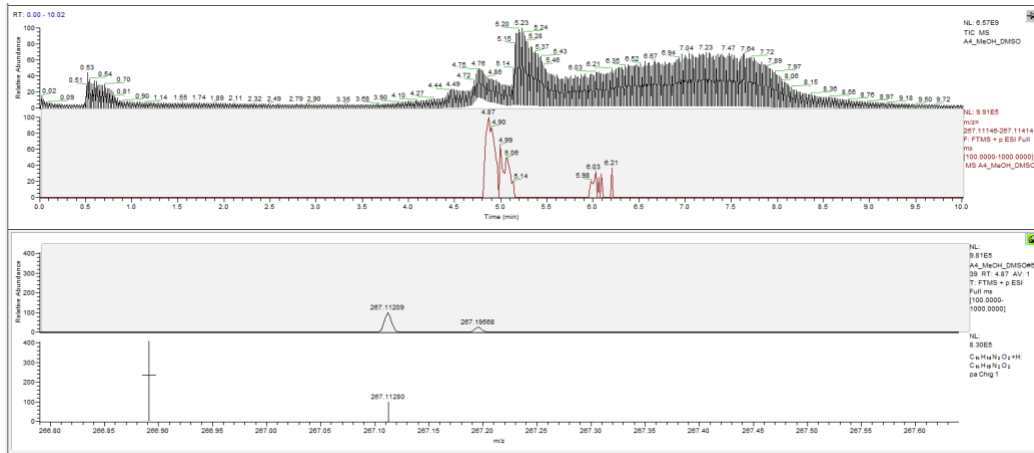

HR-MS spectrum of 10

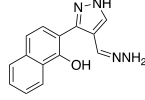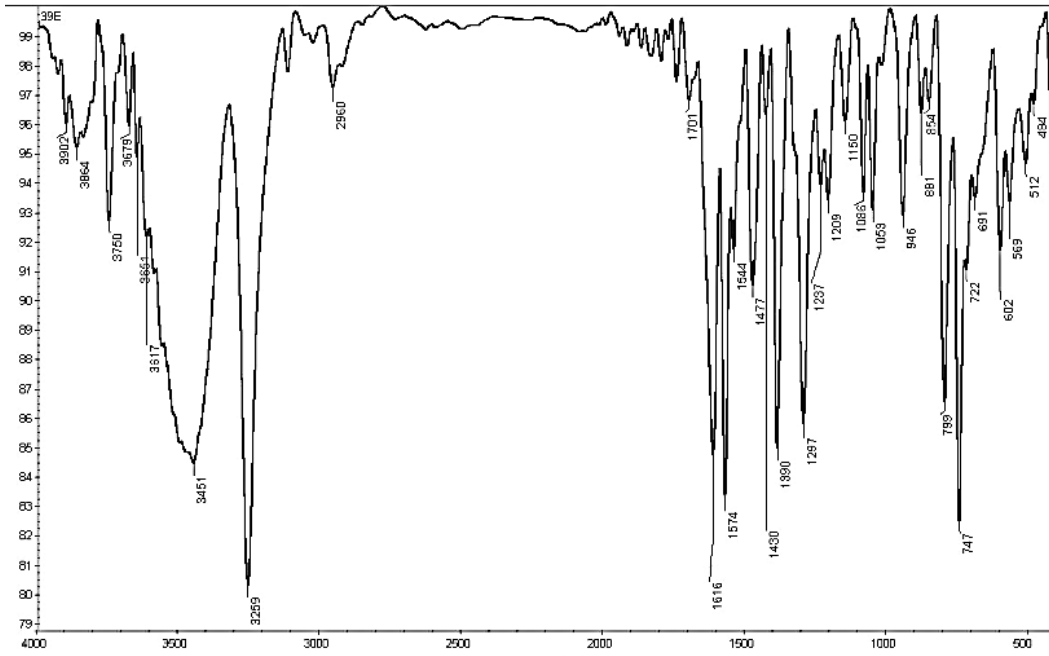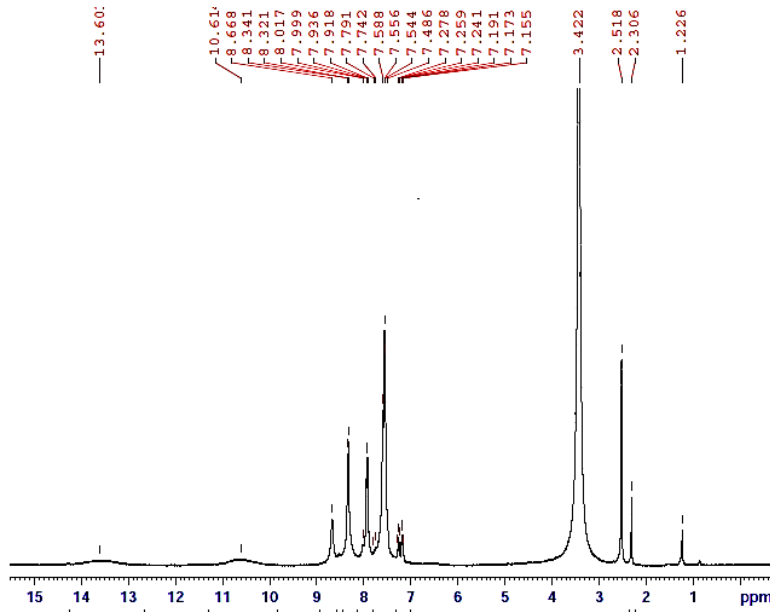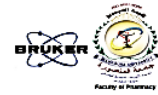

Current Data Parameters  
 NAME Aya alsawi 396 - M proton  
 EXNO 10  
 PROCNO 1

F2 - Acquisition Parameters  
 Date\_ 20191117  
 Time 3.08 h  
 INSTRUM spect  
 FREQID 2108618 0445  
 CULPROG zg30  
 TD 65536  
 SOLVENT DMSO  
 NS 16  
 DS 2  
 SWH 8012.820 Hz  
 FIDRES 0.244532 Hz  
 AQ 4.0854465 sec  
 RG 112.56  
 IN 62.400 usec  
 DE 6.50 usec  
 IE 253.3 K  
 D1 1.00000000 sec  
 TDS  
 SFO1 400.2024712 MHz  
 NUC1 1H  
 P1 13.50 usec  
 PLW1 13.00000000 W

F2 - Processing parameters  
 SI 65536  
 SF 400.2000000 MHz  
 WDW EM  
 SSB 0  
 LB 0.30 Hz  
 GB 0  
 PC 1.00



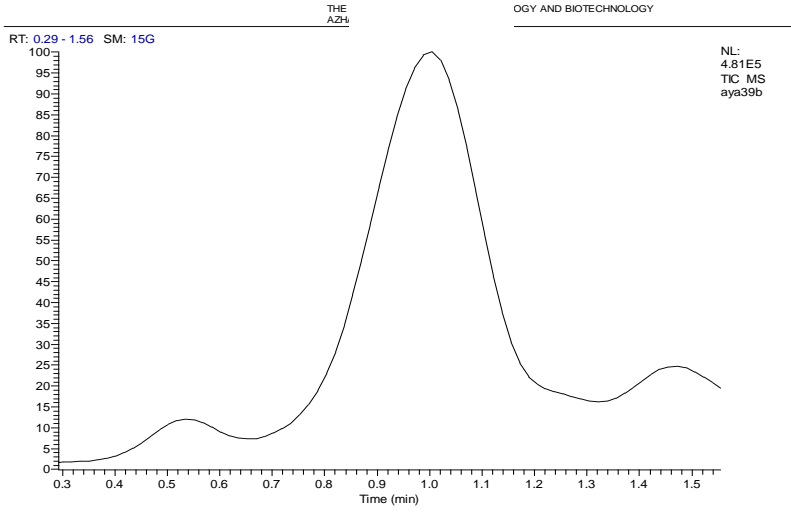

aya39b #32 RT: 0.55 AV: 1 SB: 2 3.82, 3.82 NL: 2.32E3  
T: (0,0) + c EI Full ms [40.00-1000.00]

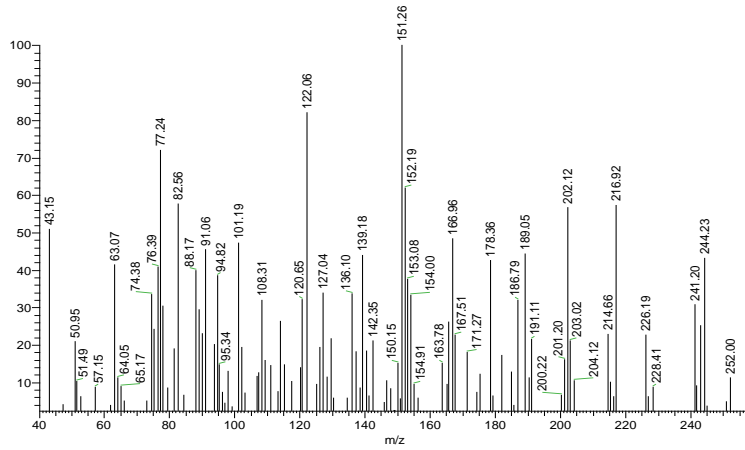

Mass spectrum of 11

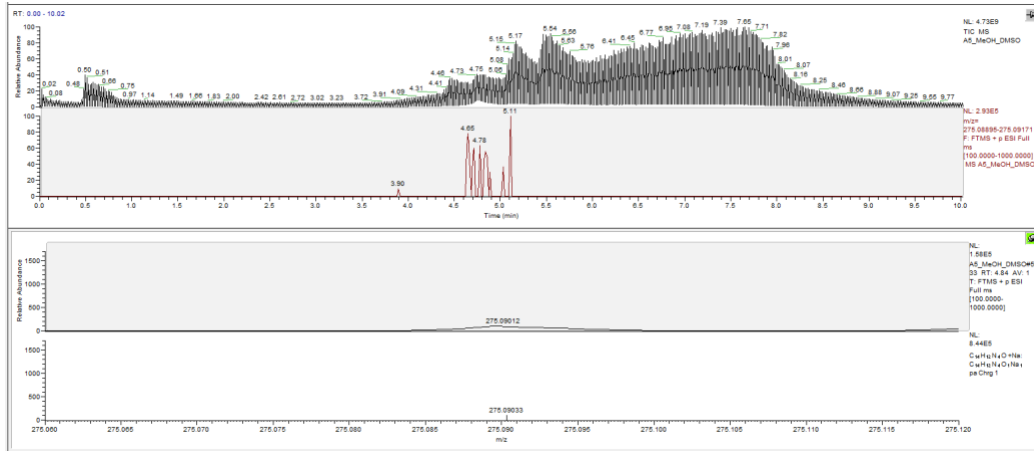

HR-MS spectrum of 11

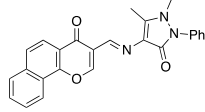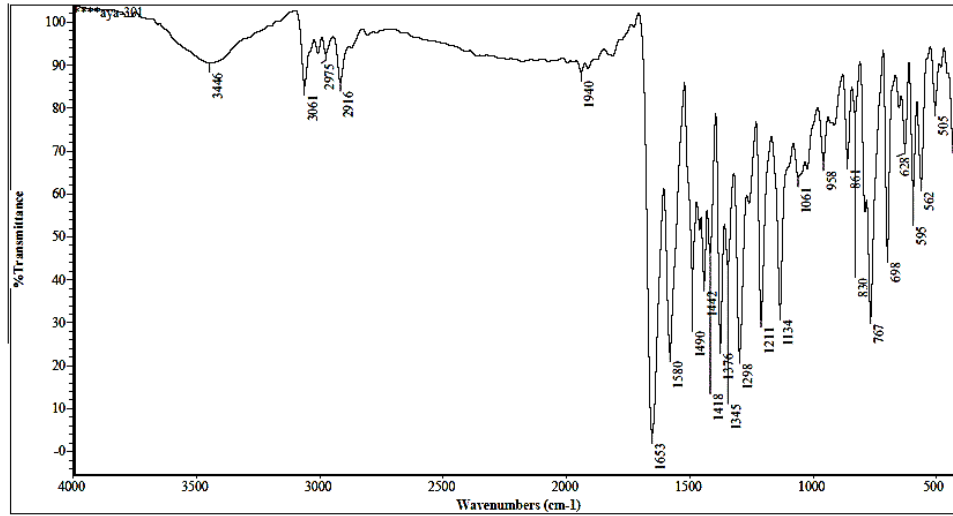

\*\*\*aya-301

Number of sample scans: 32  
 Number of background scans: 32  
 Resolution: 4.000  
 Sample gain: 4.0  
 Optical velocity: 0.4747  
 Aperture: 80.00

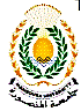

Tue Apr 09 13:24:05 2019 (GMT+02:00)

**ThermoFisher**  
 SCIENTIFIC

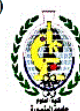

Mansoura University  
 Faculty of Science  
 Spectral Analyses unit  
 Chemistry Department  
 ThermoFisher Nicolette IS10, USA  
 Spectral range: 4000 - 400 cm-1

IR spectrum of 12a

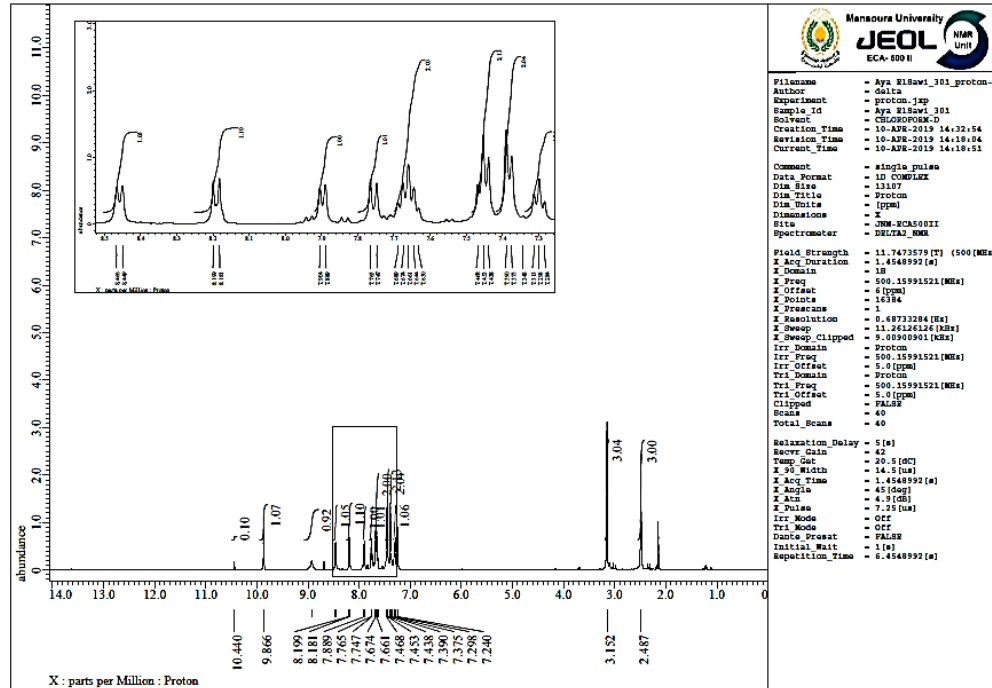

Mansoura University  
**JEOL** NMR Unit  
 ECA-600H

```

Filename = Aya_Kilawi_101_proton-1.
Author = Gaita
Experiment = proton_1xp
Sample ID = Aya_Kilawi_101
Solvent = CHLOROFORM-D
Creation Time = 10-ADR-2019 14:32:54
Revision Time = 10-ADR-2019 14:18:04
Current Time = 10-ADR-2019 14:18:51

Comment = single_pulse
Data Format = ID COMPLEX
Dir Size = 1317
Dir Title = Proton
Dir Units = [ppm]
Dimensions = 1
Site = JNM-ECX600EI
Spectrometer = JEOL7AJ_NMR

Field Strength = 11.747379 [T] (500 [MHz])
X_Acq Duration = 1.4548992 [s]
X_Domain = 18
X_Freq = 500.15991521 [MHz]
X_Offset = 6 [ppm]
X_Points = 16384
X_Prescans = 1
X_Resolution = 0.69732884 [Hz]
X_Sweep = 11.26126126 [kHz]
X_Sweep_Clippped = 9.88989891 [kHz]
Irr_Domain = Proton
Irr_Freq = 500.15991521 [MHz]
Irr_Offset = 5.0 [ppm]
Tri_Domain = Proton
Tri_Freq = 500.15991521 [MHz]
Tri_Offset = 5.0 [ppm]
Clipped = FALSE
Scans = 40
Total_Scans = 40

Relaxation Delay = 5 [s]
Recvr Gain = 42
Temp Cal = 20.5 [degC]
X_90_Width = 14.5 [us]
X_Acq Time = 1.4548992 [s]
X_Angle = 45 [deg]
X_Pulse = 4.9 [dB]
X_Pulse_Prog = 7.00 [us]
Irr_Mode = Off
Tri_Mode = Off
Dance_Program = FALSE
Initial Wait = 1 [s]
Repetition Time = 6.4548992 [s]
  
```

1H NMR spectrum of 12a

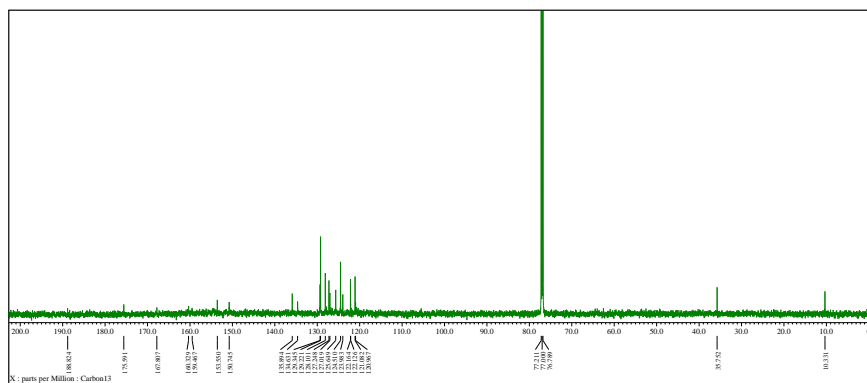

$^{13}\text{C}$  NMR spectrum of **12a**

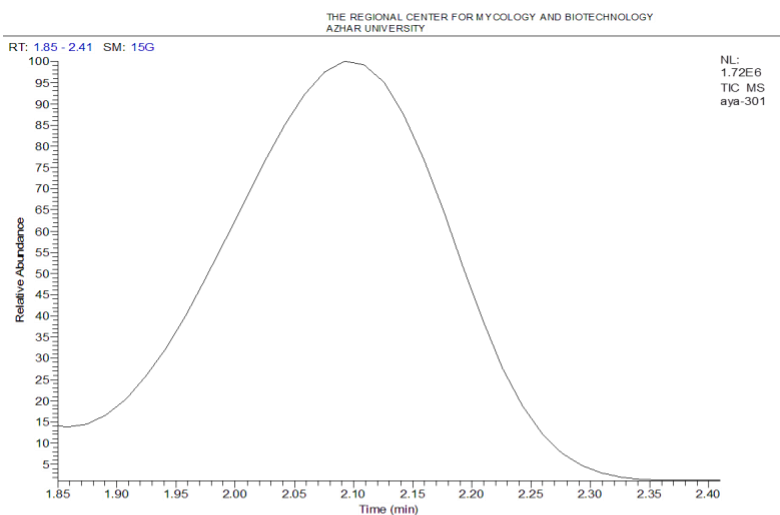

aya-301 #191-192 RT: 3.21-3.23 AV: 2 SB: 2 4.47, 4.47 NL: 4.39E2  
T: (0,0) +c EI Full ms [40.00-1000.00]

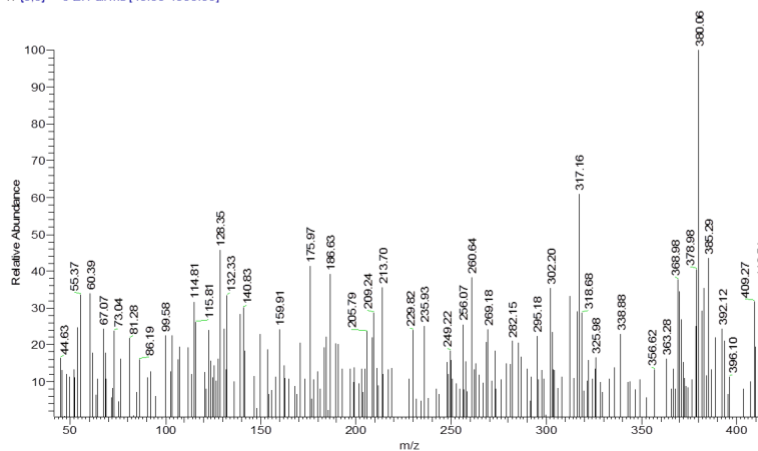

Mass spectrum of **12a**

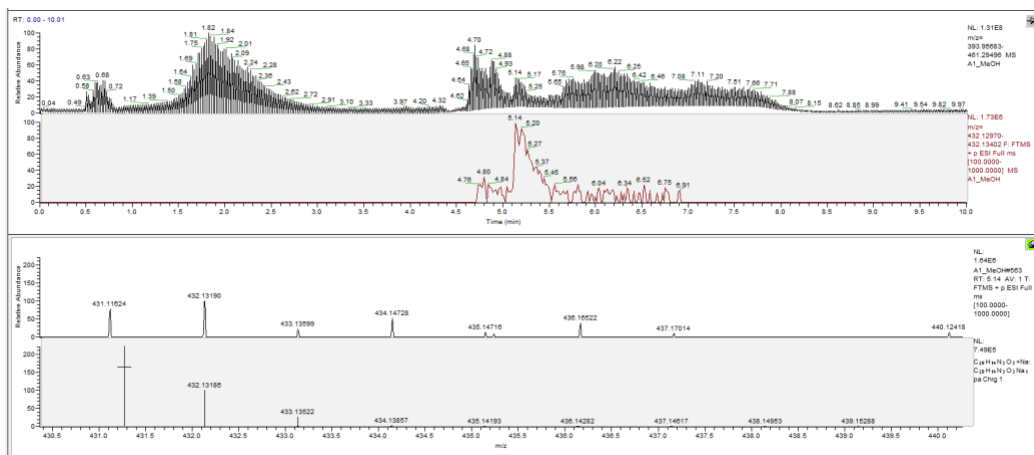

HR-MS spectrum of 12a

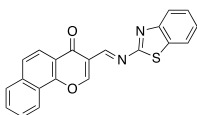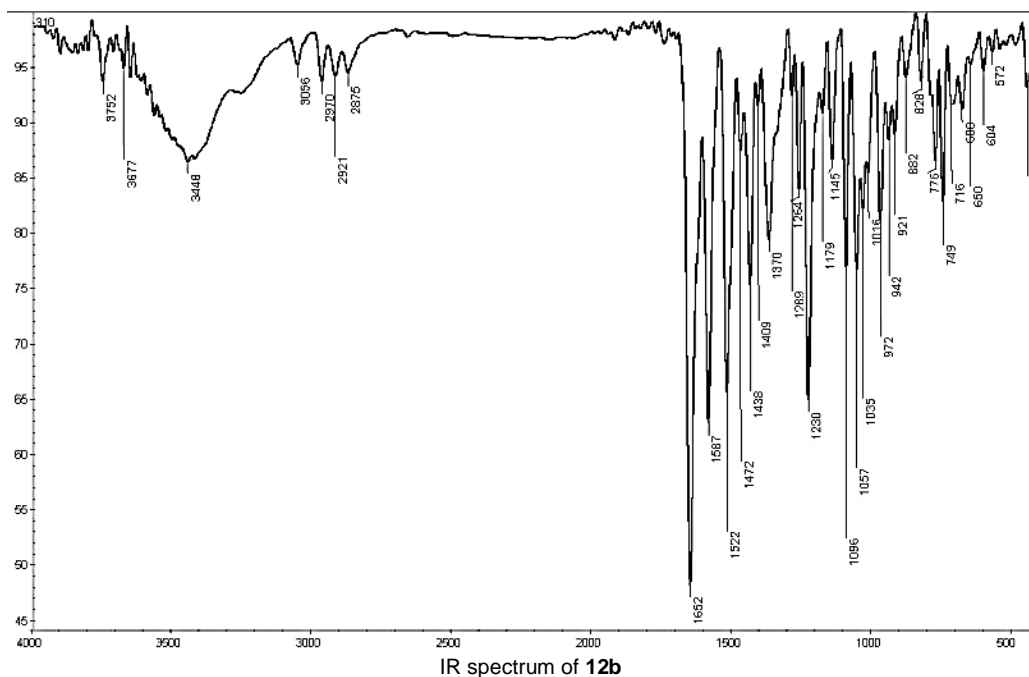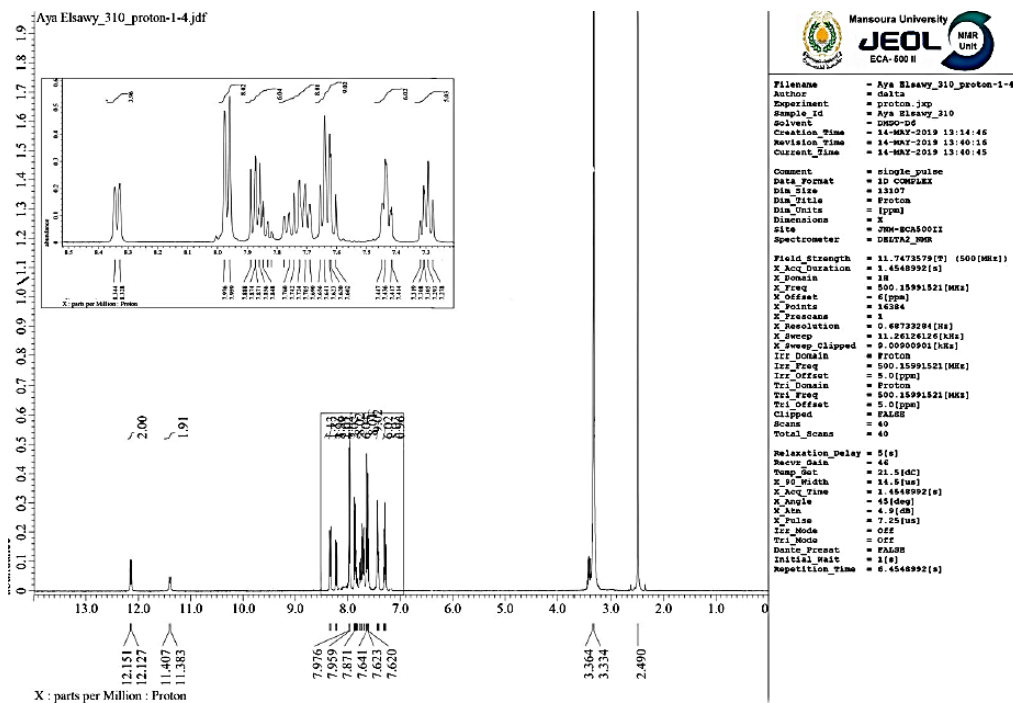

Mansoura University  
JEOL NMR UNIT  
ECA-600 II

```

Filename = Aya_Elsawy_310_proton-1-4.
Author = delta
Experiment = proton_jkp
Sample_Id = Aya_Elsawy_310
Solvent = DMSO-d6
Creation_Time = 14-MAY-2019 13:54:46
Revision_Time = 14-MAY-2019 13:40:16
Current_Time = 14-MAY-2019 13:40:45

Comment = single pulse
Data_Format = 3D COMPLEX
Dir_Type = 13107
Dir_Title = Proton
Dir_Unit = [ppm]
Discipline = X
Site = JNM-ECX600II
Spectrometer = spect2_300

Field_Strength = 11.7473579[P] (500[MHz])
X_Acq_Duration = 3.4548992[s]
X_Pulsin = 18
X_Freq = 500.13591521[MHz]
X_Offset = 6[ppm]
X_Points = 16384
X_Programs = 3
X_Resolution = 0.68732284[Hz]
X_Sweep = 11.28228282[s][Hz]
X_Sweep_Clipped = 9.0090901[Hz]
Irr_Domain = PROTON
Irr_Freq = 500.13591521[MHz]
Irr_Offset = 5.0[ppm]
Tr1_Domain = PROTON
Tr1_Freq = 500.13591521[MHz]
Tr1_Offset = 5.0[ppm]
Clipped = FALSE
Scans = 40
Total_Scans = 40

Relaxation_Delay = 5[s]
Recov_Gain = 46
Temp_Set = 21.5[degC]
X_P1_Width = 11.6[us]
X_Acq_Time = 3.4548992[s]
X_Angle = 45[deg]
X_Alt = 4.0[deg]
X_Pulse = 7.25[us]
Irr_Mode = Off
Tr1_Mode = Off
Date_Recd = 14-MAY-2019
Initial_Stat = 1[s]
Repetition_Time = 6.4548992[s]

```



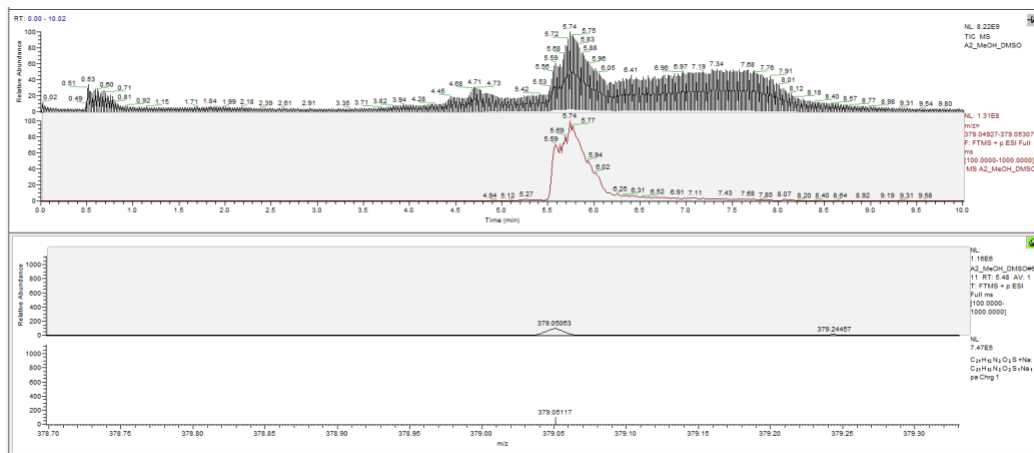

HR-MS spectrum of 12b

## 2. Pharmacokinetic parameters of the synthesized derivatives

| Comp       | Mol. Weight | #Rotatable bonds | #H-bond acceptors | #H-bond donors | TPSA   | Silicos-IT Log P | Bioavailability Score | Solubility         |
|------------|-------------|------------------|-------------------|----------------|--------|------------------|-----------------------|--------------------|
| <b>3a</b>  | 290.27      | 2                | 4                 | 2              | 93.95  | 3.54             | 0.55                  | Soluble            |
| <b>3b</b>  | 380.4       | 3                | 4                 | 1              | 83.09  | 4.6              | 0.55                  | Moderately soluble |
| <b>3c</b>  | 396.39      | 4                | 5                 | 1              | 92.32  | 4.13             | 0.55                  | Moderately soluble |
| <b>3d</b>  | 445.26      | 3                | 4                 | 1              | 83.09  | 4.75             | 0.55                  | Poorly soluble     |
| <b>3e</b>  | 411.37      | 4                | 6                 | 1              | 128.91 | 1.91             | 0.55                  | Moderately soluble |
| <b>3f</b>  | 476.48      | 4                | 5                 | 1              | 110.02 | 3.68             | 0.55                  | Poorly soluble     |
| <b>3g</b>  | 387.41      | 3                | 5                 | 1              | 124.22 | 4.66             | 0.55                  | Moderately soluble |
| <b>3h</b>  | 423.44      | 3                | 5                 | 1              | 124.22 | 5.15             | 0.55                  | Poorly soluble     |
| <b>3i</b>  | 475.45      | 4                | 7                 | 1              | 125.66 | 5.18             | 0.55                  | Poorly soluble     |
| <b>5</b>   | 305.29      | 4                | 5                 | 1              | 95.46  | 3.31             | 0.55                  | Soluble            |
| <b>6</b>   | 305.29      | 2                | 5                 | 3              | 99.1   | 2.89             | 0.55                  | Moderately soluble |
| <b>7</b>   | 297.33      | 2                | 3                 | 3              | 113.86 | 4.25             | 0.55                  | Soluble            |
| <b>8</b>   | 331.39      | 2                | 3                 | 1              | 74.96  | 4.78             | 0.55                  | Moderately soluble |
| <b>10</b>  | 266.29      | 2                | 3                 | 1              | 47.14  | 3.52             | 0.55                  | Soluble            |
| <b>11</b>  | 280.28      | 3                | 4                 | 3              | 104.36 | 2.55             | 0.55                  | Soluble            |
| <b>12a</b> | 409.44      | 3                | 4                 | 0              | 69.5   | 4.95             | 0.55                  | Moderately soluble |
| <b>12b</b> | 356.4       | 2                | 4                 | 0              | 83.7   | 6.45             | 0.55                  | Moderately soluble |

### 3. Role of hydrophobic interactions in docking of compound 3c

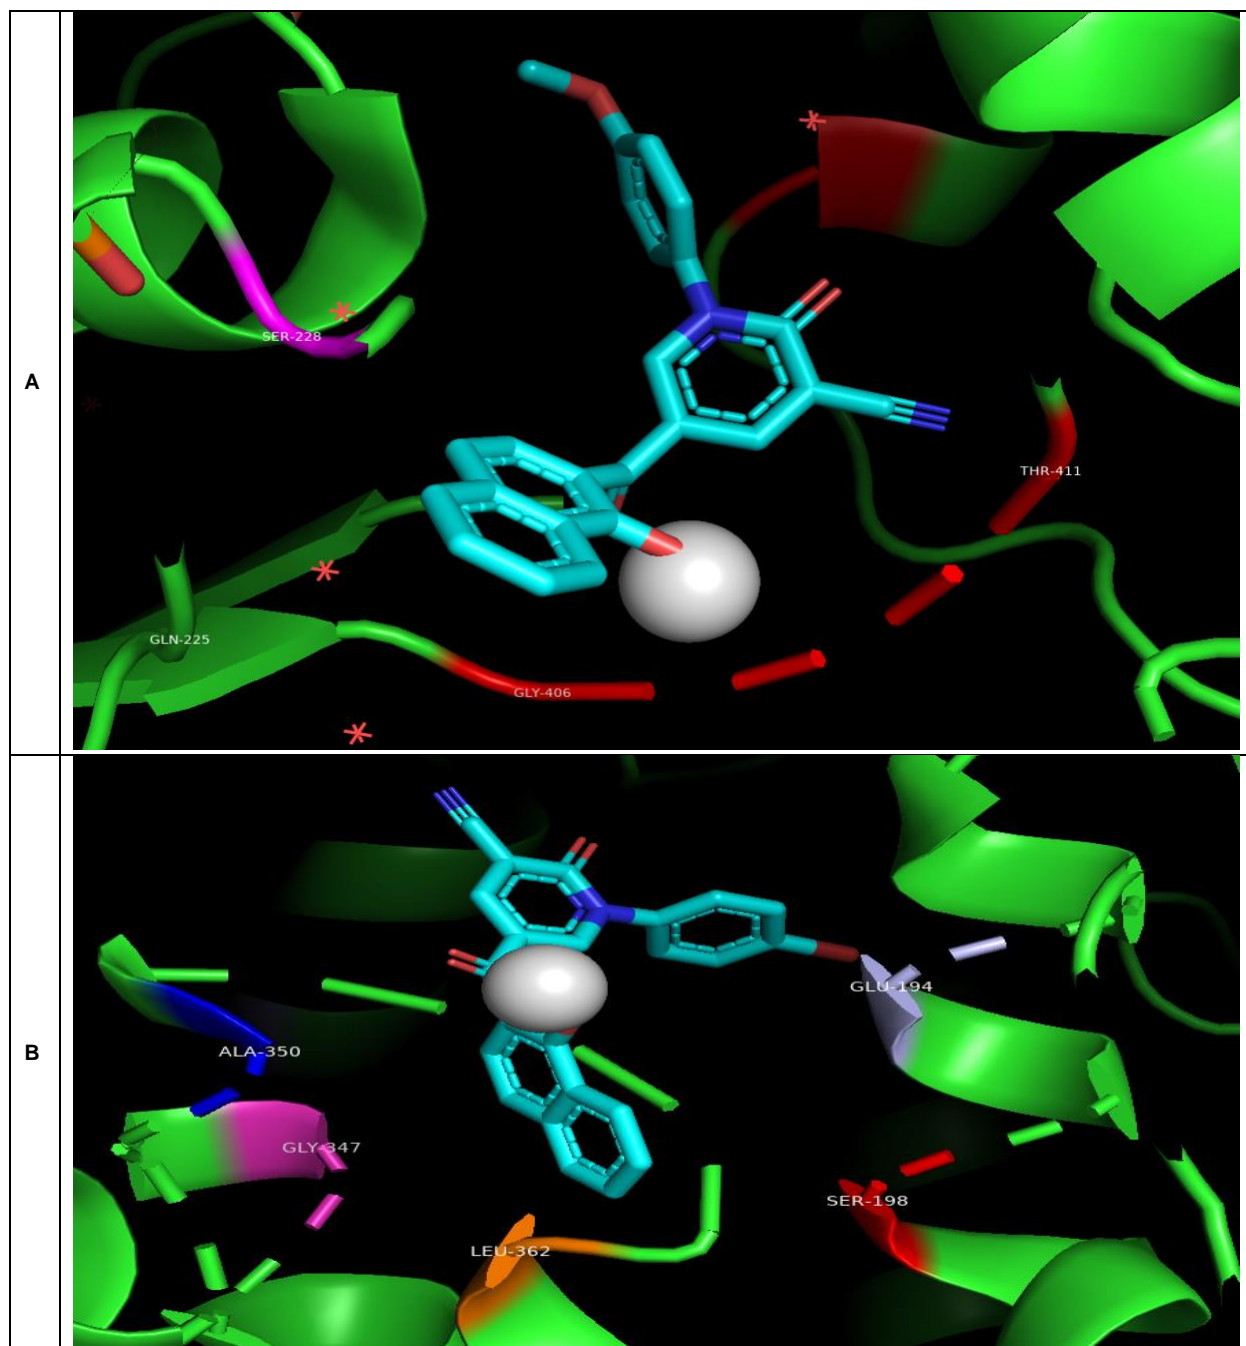

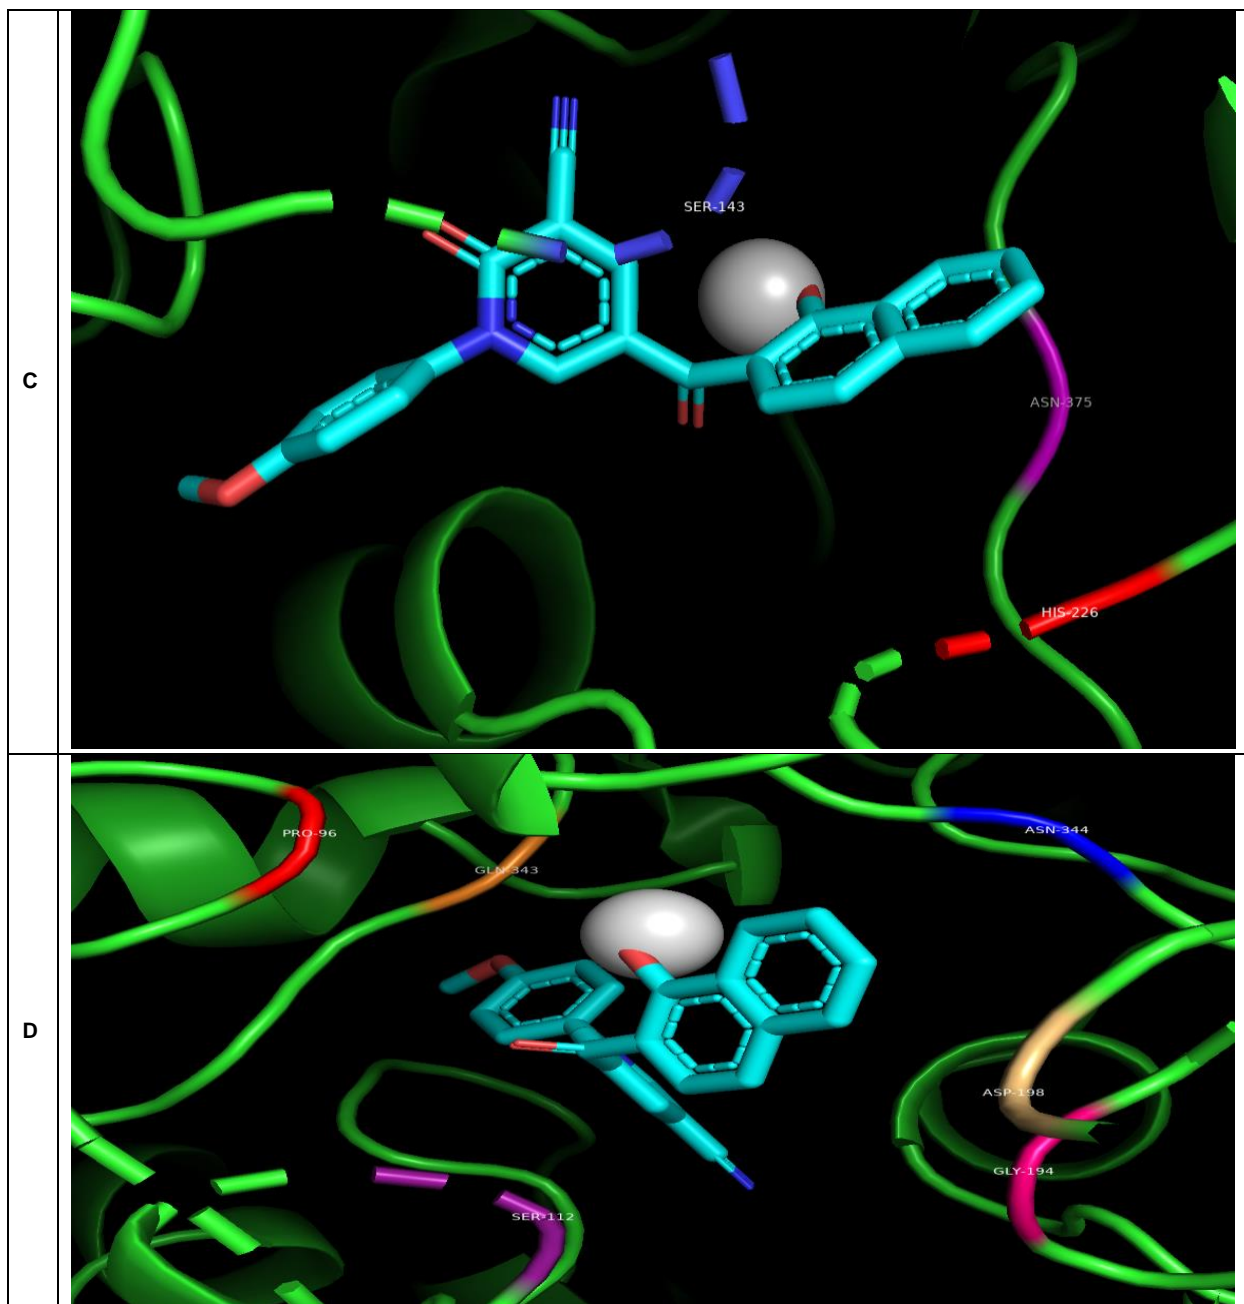

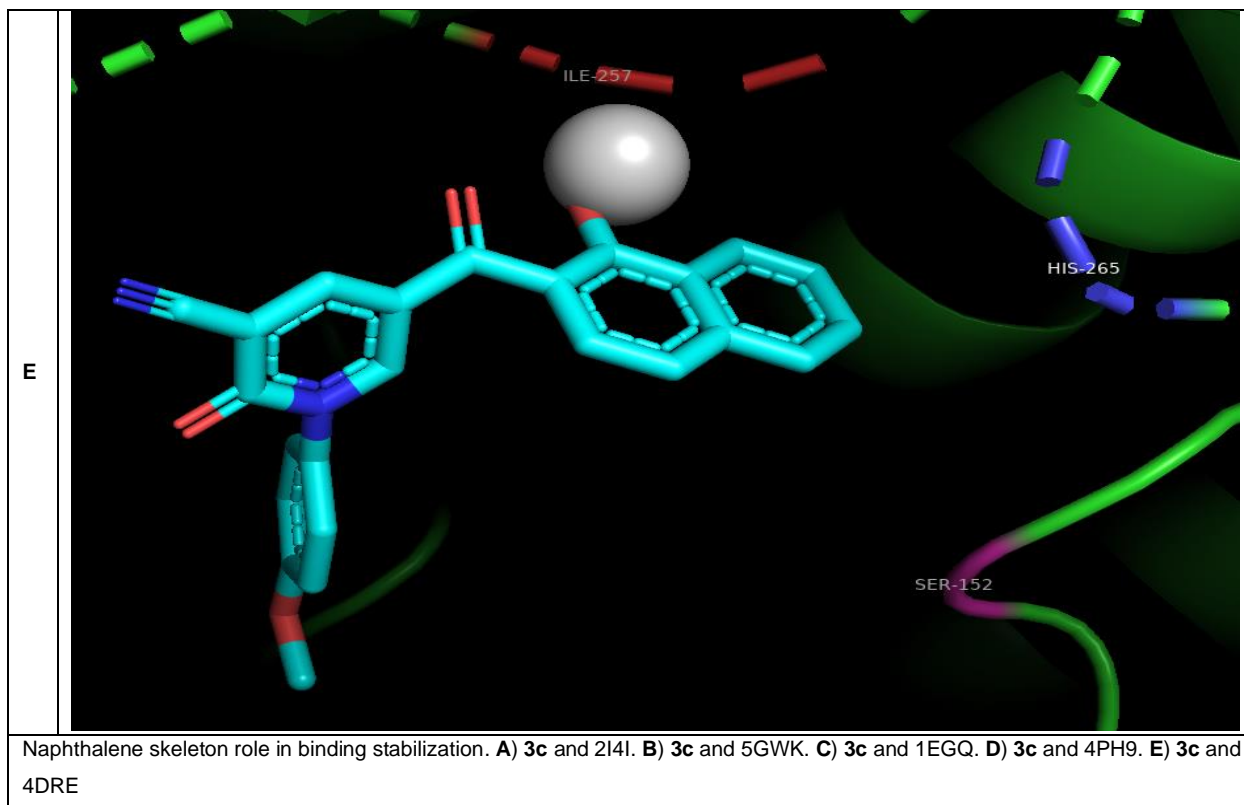

Supplement: d0ra08526j1.pdf [file d0ra08526j1.pdf]
