# Supplementary material for: Synthesis of novel naphthalene-heterocycle hybrids with potent antitumor, anti-inflammatory and antituberculosis activities
Source: Royal Society of Chemistry journal article supplement (doi:10.1039/d0ra08526j), 2020-01-01
Supplement: d0ra08526j2.xlsx [file d0ra08526j2.xlsx]

## Sheet: Sheet1
Biological Activity	3a		3b		3c		3d		3e		3f		3g		3h		3i		5		6		7		8		10		11		12a		12b
	pa	pi	pa	pi	pa	pi	pa	pi	pa	pi	pa	pi	pa	pi	pa	pi	pa	pi	pa	pi	pa	pi	pa	pi	pa	pi	pa	pi	pa	pi	pa	pi	pa	pi
Anticancer
Antineoplastic	0,323	0,140	0,222	0,210	0,264	0,176	0,236	0,196	NA	NA	NA	NA	NA	NA	NA	NA	NA	NA	NA	NA	0,424	0,095	0,245	0,189	0,327	0,137	0,681	0,029	0,660	0,033	NA	NA	0,299	0,153
Antineoplastic (bladder cancer)	NA	NA	NA	NA	NA	NA	NA	NA	0,147	0,141	NA	NA	NA	NA	NA	NA	NA	NA	0,151	0,129	0,157	0,115	NA	NA	0,189	0,058	NA	NA	NA	NA	NA	NA	NA	NA
Antineoplastic (bone cancer)	NA	NA	NA	NA	NA	NA	NA	NA	NA	NA	NA	NA	NA	NA	0,206	0,134	NA	NA	0,258	0,024	NA	NA	NA	NA	NA	NA	NA	NA	NA	NA	NA	NA	NA	NA
Antineoplastic (brain cancer)	NA	NA	0,191	0,147	0,210	0,111	0,208	0,114	0,216	0,099	NA	NA	NA	NA	NA	NA	NA	NA	0,241	0,066	NA	NA	0,330	0,018	NA	NA	NA	NA	NA	NA	NA	NA	NA	NA
Antineoplastic (breast cancer)	0,181	0,106	0,172	0,114	0,228	0,081	0,209	0,089	0,176	0,111	NA	NA	NA	NA	0,152	0,135	NA	NA	0,174	0,113	NA	NA	NA	NA	0,271	0,064	NA	NA	NA	NA	NA	NA	0,249	0,072
Antineoplastic (carcinoma)	NA	NA	NA	NA	0,095	0,088	0,117	0,066	NA	NA	NA	NA	NA	NA	NA	NA	NA	NA	NA	NA	NA	NA	NA	NA	NA	NA	NA	NA	NA	NA	NA	NA	NA	NA
Antineoplastic (cervical cancer)	NA	NA	NA	NA	0,114	0,085	NA	NA	NA	NA	NA	NA	NA	NA	NA	NA	NA	NA	0,110	0,088	0,205	0,039	NA	NA	0,226	0,033	0,207	0,039	0,394	0,010	NA	NA	0,130	0,073
Antineoplastic (colon cancer)	0,118	0,102	NA	NA	0,116	0,104	NA	NA	NA	NA	NA	NA	NA	NA	NA	NA	NA	NA	NA	NA	0,119	0,101	NA	NA	0,161	0,075	0,495	0,013	0,458	0,015	NA	NA	0,321	0,030
Antineoplastic (colorectal cancer)	0,137	0,099	NA	NA	0,132	0,103	NA	NA	NA	NA	NA	NA	NA	NA	NA	NA	NA	NA	NA	NA	0,126	0,107	NA	NA	0,174	0,076	0,507	0,013	0,466	0,015	NA	NA	0,324	0,032
Antineoplastic (endocrine cancer)	NA	NA	NA	NA	NA	NA	NA	NA	NA	NA	NA	NA	NA	NA	0,160	0,111	NA	NA	NA	NA	NA	NA	NA	NA	NA	NA	NA	NA	NA	NA	NA	NA	NA	NA
Antineoplastic (gastric cancer)	0,138	0,072	0,149	0,055	0,176	0,034	0,152	0,053	0,153	0,051	NA	NA	NA	NA	NA	NA	NA	NA	NA	NA	NA	NA	NA	NA	0,138	0,072	NA	NA	NA	NA	NA	NA	NA	NA
Antineoplastic (glioblastoma multiforme)	NA	NA	NA	NA	NA	NA	0,156	0,137	NA	NA	NA	NA	NA	NA	NA	NA	NA	NA	NA	NA	NA	NA	NA	NA	0,152	0,147	0,202	0,061	NA	NA	NA	NA	NA	NA
Antineoplastic (glioma)	NA	NA	NA	NA	NA	NA	NA	NA	NA	NA	NA	NA	NA	NA	NA	NA	NA	NA	NA	NA	NA	NA	NA	NA	NA	NA	0,188	0,040	NA	NA	NA	NA	NA	NA
Antineoplastic (liver cancer)	0,217	0,066	0,207	0,077	0,232	0,054	0,213	0,071	0,201	0,084	NA	NA	NA	NA	NA	NA	NA	NA	NA	NA	NA	NA	NA	NA	0,202	0,082	0,189	0,099	NA	NA	NA	NA	NA	NA
Antineoplastic (lung cancer)	NA	NA	NA	NA	NA	NA	NA	NA	NA	NA	NA	NA	NA	NA	NA	NA	NA	NA	NA	NA	NA	NA	NA	NA	NA	NA	0,233	0,056	0,209	0,066	NA	NA	0,309	0,038
Antineoplastic (lymphocytic leukemia)	NA	NA	NA	NA	NA	NA	NA	NA	NA	NA	NA	NA	NA	NA	NA	NA	NA	NA	NA	NA	0,112	0,087	NA	NA	NA	NA	NA	NA	NA	NA	NA	NA	NA	NA
Antineoplastic (melanoma)	NA	NA	NA	NA	NA	NA	NA	NA	NA	NA	NA	NA	NA	NA	NA	NA	NA	NA	0,282	0,026	0,188	0,062	0,280	0,026	0,151	0,101	0,339	0,016	0,652	0,004	NA	NA	0,495	0,007
Antineoplastic (multiple myeloma)	NA	NA	NA	NA	NA	NA	NA	NA	NA	NA	NA	NA	NA	NA	NA	NA	NA	NA	0,296	0,083	NA	NA	NA	NA	NA	NA	NA	NA	NA	NA	NA	NA	NA	NA
Antineoplastic (non-Hodgkin's lymphoma)	NA	NA	NA	NA	NA	NA	NA	NA	NA	NA	NA	NA	NA	NA	NA	NA	NA	NA	NA	NA	NA	NA	NA	NA	NA	NA	0,461	0,057	0,626	0,010	NA	NA	NA	NA
Antineoplastic (non-small cell lung cancer)	NA	NA	NA	NA	0,192	0,090	0,157	0,145	0,157	0,145	NA	NA	NA	NA	NA	NA	NA	NA	0,208	0,069	NA	NA	0,228	0,051	0,191	0,091	NA	NA	NA	NA	NA	NA	NA	NA
Antineoplastic (ovarian cancer)	NA	NA	NA	NA	NA	NA	NA	NA	NA	NA	NA	NA	NA	NA	NA	NA	NA	NA	NA	NA	NA	NA	0,144	0,064	0,114	0,094	0,170	0,049	0,109	0,099	NA	NA	NA	NA
Antineoplastic (pancreatic cancer)	0,212	0,165	NA	NA	NA	NA	0,252	0,104	0,268	0,087	NA	NA	NA	NA	NA	NA	NA	NA	0,226	0,139	NA	NA	0,202	0,183	0,200	0,188	NA	NA	NA	NA	NA	NA	NA	NA
Antineoplastic (renal cancer)	NA	NA	NA	NA	NA	NA	NA	NA	0,143	0,129	NA	NA	NA	NA	NA	NA	NA	NA	0,245	0,021	NA	NA	NA	NA	0,152	0,108	NA	NA	0,406	0,005	NA	NA	NA	NA
Antineoplastic (sarcoma)	0,232	0,036	0,227	0,038	0,248	0,030	0,260	0,026	0,243	0,031	0,164	0,119	0,160	0,130	0,217	0,043	0,156	0,140	NA	NA	0,204	0,053	0,163	0,120	0,350	0,010	NA	NA	NA	NA	NA	NA	NA	NA
Antineoplastic (small cell lung cancer)	0,198	0,196	NA	NA	0,233	0,117	NA	NA	NA	NA	NA	NA	NA	NA	NA	NA	NA	NA	NA	NA	NA	NA	0,199	0,193	0,232	0,118	NA	NA	0,239	0,105	NA	NA	NA	NA
Antineoplastic (solid tumors)	NA	NA	NA	NA	0,225	0,173	NA	NA	NA	NA	NA	NA	0,219	0,185	0,262	0,125	NA	NA	NA	NA	0,374	0,048	NA	NA	0,239	0,153	NA	NA	NA	NA	NA	NA	NA	NA
Antineoplastic (squamous cell carcinoma)	NA	NA	NA	NA	0,094	0,077	NA	NA	NA	NA	NA	NA	NA	NA	NA	NA	NA	NA	NA	NA	0,112	0,059	NA	NA	NA	NA	NA	NA	NA	NA	NA	NA	NA	NA
Antineoplastic (thyroid cancer)	NA	NA	NA	NA	NA	NA	NA	NA	NA	NA	NA	NA	NA	NA	NA	NA	NA	NA	NA	NA	NA	NA	NA	NA	0,150	0,133	NA	NA	NA	NA	NA	NA	NA	NA
Antineoplastic (uterine cancer)	0,190	0,013	0,153	0,031	0,175	0,017	0,136	0,051	0,169	0,020	0,125	0,073	0,123	0,080	0,124	0,077	0,139	0,047	NA	NA	0,149	0,034	0,160	0,025	0,189	0,013	0,136	0,051	0,125	0,074	NA	NA	NA	NA
Antineoplastic antibiotic	NA	NA	NA	NA	NA	NA	NA	NA	NA	NA	NA	NA	NA	NA	NA	NA	NA	NA	NA	NA	NA	NA	NA	NA	NA	NA	0,074	0,067	NA	NA	NA	NA	NA	NA
Antineoplastic enhancer	NA	NA	NA	NA	NA	NA	NA	NA	NA	NA	NA	NA	NA	NA	NA	NA	NA	NA	NA	NA	NA	NA	NA	NA	NA	NA	0,230	0,062	NA	NA	NA	NA	NA	NA
Antimetastatic	NA	NA	NA	NA	NA	NA	NA	NA	NA	NA	NA	NA	0,358	0,059	0,281	0,090	NA	NA	NA	NA	NA	NA	NA	NA	NA	NA	NA	NA	NA	NA	NA	NA	NA	NA
TP53 expression enhancer	NA	NA	NA	NA	NA	NA	NA	NA	0,267	0,241	NA	NA	NA	NA	NA	NA	NA	NA	0,304	0,206	NA	NA	NA	NA	NA	NA	0,433	0,123	NA	NA	NA	NA	NA	NA
Antimicrobial
Antibacterial	NA	NA	NA	NA	NA	NA	NA	NA	0,164	0,151	0,163	0,152	NA	NA	NA	NA	NA	NA	0,343	0,045	NA	NA	0,178	0,139	0,203	0,115	NA	NA	0,162	0,153	0,271	0,072	0,254	0,081
Antifungal	NA	NA	NA	NA	NA	NA	NA	NA	NA	NA	NA	NA	NA	NA	NA	NA	NA	NA	0,231	0,117	NA	NA	0,253	0,105	0,221	0,124	0,271	0,095	0,227	0,120	NA	NA	0,205	0,133
Anti-Helicobacter pylori	0,189	0,149	0,192	0,143	0,192	0,144	NA	NA	NA	NA	NA	NA	NA	NA	0,247	0,064	NA	NA	0,178	0,172	NA	NA	0,254	0,058	0,368	0,013	NA	NA	NA	NA	NA	NA	0,324	0,020
Antimycobacterial	NA	NA	0,194	0,180	0,194	0,181	0,259	0,111	0,289	0,088	NA	NA	NA	NA	NA	NA	NA	NA	0,631	0,008	NA	NA	0,285	0,090	0,296	0,083	NA	NA	0,481	0,022	0,246	0,123	0,302	0,080
Antituberculosic	NA	NA	0,193	0,180	NA	NA	0,237	0,125	0,290	0,076	NA	NA	NA	NA	NA	NA	NA	NA	0,625	0,005	NA	NA	0,267	0,093	0,225	0,139	NA	NA	0,452	0,019	0,228	0,135	0,292	0,075
Antiviral
Antiviral	0,235	0,069	0,184	0,113	NA	NA	0,176	0,126	NA	NA	NA	NA	0,172	0,131	0,166	0,139	NA	NA	NA	NA	0,245	0,063	NA	NA	0,157	0,153	NA	NA	NA	NA	NA	NA	NA	NA
Antiviral (Adenovirus)	0,215	0,185	NA	NA	NA	NA	NA	NA	NA	NA	NA	NA	NA	NA	NA	NA	NA	NA	NA	NA	NA	NA	0,258	0,130	0,230	0,164	NA	NA	0,218	0,181	NA	NA	NA	NA
Antiviral (CMV)	NA	NA	NA	NA	NA	NA	NA	NA	NA	NA	NA	NA	NA	NA	0,198	0,188	NA	NA	NA	NA	NA	NA	NA	NA	0,238	0,096	0,231	0,107	NA	NA	NA	NA	0,201	0,180
Antiviral (Herpes)	NA	NA	NA	NA	NA	NA	NA	NA	NA	NA	NA	NA	NA	NA	NA	NA	NA	NA	NA	NA	NA	NA	NA	NA	NA	NA	NA	NA	NA	NA	NA	NA	NA	NA
Antiviral (HIV)	0,185	0,038	0,140	0,078	NA	NA	0,128	0,099	NA	NA	NA	NA	0,140	0,078	0,129	0,095	0,133	0,089	NA	NA	0,212	0,026	NA	NA	0,130	0,093	NA	NA	NA	NA	NA	NA	NA	NA
Antiviral (Influenza)	NA	NA	NA	NA	NA	NA	NA	NA	NA	NA	NA	NA	NA	NA	NA	NA	NA	NA	NA	NA	NA	NA	NA	NA	NA	NA	0,203	0,192	NA	NA	NA	NA	NA	NA
Antiviral (Picornavirus)	NA	NA	NA	NA	NA	NA	NA	NA	0,284	0,255	0,285	0,252	NA	NA	NA	NA	NA	NA	0,343	0,167	NA	NA	NA	NA	NA	NA	0,283	0,257	NA	NA	0,558	0,030	NA	NA
Antiviral (Poxvirus)	0,226	0,122	NA	NA	NA	NA	NA	NA	NA	NA	NA	NA	NA	NA	NA	NA	NA	NA	0,211	0,143	0,213	0,140	0,217	0,134	NA	NA	NA	NA	0,210	0,144	NA	NA	NA	NA
Antiviral (Rhinovirus)	NA	NA	NA	NA	NA	NA	NA	NA	NA	NA	NA	NA	NA	NA	NA	NA	NA	NA	NA	NA	NA	NA	NA	NA	NA	NA	0,302	0,250	NA	NA	NA	NA	NA	NA
Viral entry inhibitor	0,224	0,079	0,204	0,141	0,199	0,162	0,201	0,154	0,199	0,159	NA	NA	NA	NA	0,237	0,052	NA	NA	NA	NA	NA	NA	NA	NA	0,223	0,083	NA	NA	NA	NA	NA	NA	NA	NA
HCV NS3-helicase inhibitor	0,248	0,017	0,282	0,013	0,277	0,013	0,309	0,010	0,264	0,015	0,182	0,032	0,390	0,005	0,249	0,017	0,219	0,023	0,303	0,010	0,185	0,032	0,170	0,036	0,130	0,054	NA	NA	0,152	0,043	0,191	0,030	0,242	0,018
Antiprotozoal
Antiprotozoal	NA	NA	NA	NA	NA	NA	NA	NA	NA	NA	NA	NA	NA	NA	NA	NA	0,220	0,090	NA	NA	NA	NA	NA	NA	NA	NA	NA	NA	NA	NA	NA	NA	NA	NA
Antiprotozoal (Amoeba)	NA	NA	NA	NA	NA	NA	NA	NA	0,222	0,183	NA	NA	NA	NA	NA	NA	NA	NA	NA	NA	0,251	0,126	NA	NA	NA	NA	NA	NA	NA	NA	NA	NA	NA	NA
Antiprotozoal (Coccidial)	0,204	0,178	NA	NA	NA	NA	NA	NA	0,272	0,085	NA	NA	NA	NA	NA	NA	NA	NA	0,252	0,107	0,225	0,144	0,256	0,101	0,345	0,038	0,303	0,060	0,202	0,182	0,199	0,186	NA	NA
Antiprotozoal (Histomonas)	NA	NA	NA	NA	NA	NA	NA	NA	0,101	0,019	NA	NA	NA	NA	NA	NA	NA	NA	0,064	0,043	NA	NA	NA	NA	NA	NA	NA	NA	NA	NA	NA	NA	NA	NA
Antiprotozoal (Leishmania)	NA	NA	NA	NA	NA	NA	NA	NA	NA	NA	NA	NA	NA	NA	NA	NA	NA	NA	NA	NA	NA	NA	NA	NA	NA	NA	NA	NA	NA	NA	NA	NA	NA	NA
Antiprotozoal (Trichomonas)	0,197	0,128	NA	NA	NA	NA	NA	NA	0,230	0,086	NA	NA	0,179	0,155	NA	NA	NA	NA	NA	NA	NA	NA	0,178	0,156	0,236	0,078	NA	NA	NA	NA	NA	NA	NA	NA
Antiinflammatory
Antiinflammatory	0,304	0,156	0,416	0,087	0,401	0,095	0,301	0,159	0,317	0,146	0,773	0,009	0,545	0,045	0,556	0,042	NA	NA	NA	NA	0,390	0,101	0,588	0,034	0,495	0,059	0,355	0,120	NA	NA	0,881	0,005	0,518	0,052
Antiinflammatory, intestinal	0,301	0,070	0,232	0,142	0,327	0,052	NA	NA	0,201	0,186	NA	NA	NA	NA	NA	NA	NA	NA	NA	NA	NA	NA	NA	NA	NA	NA	NA	NA	NA	NA	NA	NA	NA	NA
Antiinflammatory, ophthalmic	NA	NA	NA	NA	NA	NA	NA	NA	NA	NA	NA	NA	NA	NA	NA	NA	NA	NA	NA	NA	0,244	0,191	NA	NA	0,272	0,127	NA	NA	0,237	0,208	NA	NA	NA	NA
Inhibitors
12-Lipoxygenase inhibitor	0,168	0,007	0,136	0,016	0,148	0,012	0,161	0,009	0,131	0,018	0,106	0,032	0,113	0,027	0,114	0,027	0,126	0,020	NA	NA	0,133	0,017	0,127	0,019	0,151	0,011	NA	NA	0,116	0,025	NA	NA	NA	NA
27-Hydroxycholesterol 7alpha-monooxygenase inhibitor	0,343	0,161	0,367	0,136	0,308	0,207	0,292	0,230	0,270	0,265	NA	NA	NA	NA	NA	NA	NA	NA	0,363	0,139	0,319	0,191	0,299	0,220	0,347	0,156	0,422	0,091	0,285	0,240	0,406	0,102	0,437	0,082
4-Nitrophenol 2-monooxygenase inhibitor	0,287	0,169	0,254	0,216	0,317	0,137	NA	NA	NA	NA	NA	NA	NA	NA	NA	NA	0,304	0,150	0,308	0,146	NA	NA	0,252	0,220	0,323	0,131	0,345	0,112	0,242	0,238	0,417	0,068	0,390	0,082
Aldehyde oxidase inhibitor	0,251	0,123	0,204	0,171	0,266	0,112	NA	NA	NA	NA	NA	NA	NA	NA	0,209	0,165	NA	NA	NA	NA	0,541	0,043	0,543	0,043	0,683	0,019	NA	NA	0,235	0,137	NA	NA	0,489	0,052
Alkane 1-monooxygenase inhibitor	0,364	0,075	0,446	0,055	0,200	0,162	0,218	0,146	0,192	0,170	NA	NA	0,195	0,168	NA	NA	NA	NA	NA	NA	0,325	0,088	0,411	0,063	0,616	0,027	0,198	0,164	0,408	0,063	NA	NA	0,202	0,161
Aminobutyraldehyde dehydrogenase inhibitor	0,379	0,104	0,319	0,157	NA	NA	0,268	0,222	0,274	0,213	NA	NA	NA	NA	NA	NA	NA	NA	NA	NA	0,397	0,092	0,358	0,120	0,361	0,118	0,304	0,174	0,402	0,089	NA	NA	NA	NA
AR expression inhibitor	0,272	0,083	0,206	0,141	0,227	0,118	NA	NA	NA	NA	NA	NA	NA	NA	NA	NA	0,184	0,174	0,224	0,121	NA	NA	NA	NA	NA	NA	NA	NA	NA	NA	NA	NA	0,213	0,133
Arylsulfate sulfotransferase inhibitor	0,226	0,140	0,240	0,127	NA	NA	NA	NA	0,278	0,098	NA	NA	NA	NA	NA	NA	NA	NA	NA	NA	0,188	0,188	0,206	0,163	0,288	0,092	0,218	0,149	0,238	0,128	NA	NA	NA	NA
Aspartate-phenylpyruvate transaminase inhibitor	0,312	0,115	0,271	0,153	NA	NA	NA	NA	0,227	0,213	NA	NA	NA	NA	NA	NA	NA	NA	NA	NA	0,381	0,072	0,335	0,098	0,421	0,057	0,278	0,146	0,538	0,028	NA	NA	NA	NA
Aspulvinone dimethylallyltransferase inhibitor	0,550	0,116	0,382	0,204	0,635	0,085	0,532	0,123	NA	NA	NA	NA	NA	NA	0,292	0,278	NA	NA	NA	NA	0,462	0,156	0,506	0,135	0,725	0,056	0,535	0,122	0,550	0,116	NA	NA	0,413	0,183
Azobenzene reductase inhibitor	0,170	0,023	0,163	0,026	0,156	0,030	0,153	0,032	0,162	0,027	0,137	0,042	0,142	0,039	0,145	0,037	0,263	0,008	NA	NA	0,178	0,021	0,184	0,019	0,198	0,015	NA	NA	0,199	0,015	NA	NA	NA	NA
Centromere associated protein inhibitor	0,464	0,038	0,369	0,073	0,237	0,194	0,568	0,020	0,227	0,209	NA	NA	NA	NA	NA	NA	NA	NA	NA	NA	NA	NA	NA	NA	NA	NA	0,250	0,176	NA	NA	NA	NA	NA	NA
Chloride peroxidase inhibitor	0,361	0,130	NA	NA	NA	NA	NA	NA	NA	NA	NA	NA	NA	NA	NA	NA	NA	NA	NA	NA	NA	NA	0,482	0,060	0,329	0,158	0,280	0,211	NA	NA	NA	NA	0,344	0,145
Cholestanetriol 26-monooxygenase inhibitor	0,280	0,061	0,188	0,132	NA	NA	NA	NA	NA	NA	NA	NA	NA	NA	NA	NA	0,300	0,053	0,179	0,144	0,233	0,089	0,196	0,123	0,340	0,041	0,200	0,118	0,209	0,109	0,183	0,139	0,242	0,082
Cyclic AMP phosphodiesterase inhibitor	0,436	0,044	0,276	0,127	0,354	0,082	0,212	0,189	0,249	0,147	NA	NA	NA	NA	NA	NA	NA	NA	NA	NA	0,278	0,126	NA	NA	0,364	0,076	0,519	0,023	0,460	0,037	NA	NA	NA	NA
Cyclooxygenase 1 inhibitor	0,100	0,057	0,249	0,020	0,228	0,023	0,167	0,033	0,105	0,054	NA	NA	0,121	0,047	0,163	0,034	0,095	0,061	NA	NA	NA	NA	NA	NA	0,325	0,012	NA	NA	NA	NA	NA	NA	NA	NA
Cyclooxygenase 2 inhibitor	NA	NA	0,120	0,041	0,104	0,050	0,093	0,058	0,076	0,072	NA	NA	0,137	0,034	0,144	0,030	NA	NA	NA	NA	NA	NA	NA	NA	0,183	0,018	NA	NA	NA	NA	NA	NA	0,133	0,036
Cyclooxygenase inhibitor	NA	NA	0,188	0,035	0,184	0,037	0,141	0,055	0,119	0,069	0,099	0,086	0,305	0,008	0,279	0,011	0,106	0,080	NA	NA	NA	NA	0,168	0,043	0,262	0,014	NA	NA	NA	NA	0,238	0,019	0,193	0,033
Dehydro-L-gulonate decarboxylase inhibitor	0,369	0,083	0,263	0,127	NA	NA	0,198	0,178	NA	NA	NA	NA	NA	NA	NA	NA	NA	NA	NA	NA	0,335	0,094	0,324	0,098	0,643	0,030	0,256	0,131	0,421	0,069	NA	NA	NA	NA
Dihydroxy-acid dehydratase inhibitor	0,380	0,020	0,343	0,028	0,197	0,086	0,202	0,082	0,290	0,042	NA	NA	0,158	0,120	NA	NA	0,147	0,135	0,184	0,096	0,179	0,100	0,187	0,093	0,149	0,132	NA	NA	0,363	0,024	NA	NA	NA	NA
Dual specificity phosphatase 1 inhibitor	0,243	0,025	0,221	0,036	0,223	0,035	0,206	0,048	0,200	0,053	0,218	0,038	0,201	0,052	0,207	0,046	0,232	0,030	0,175	0,087	0,187	0,068	0,210	0,044	0,229	0,031	0,176	0,086	0,173	0,091	0,204	0,049	0,187	0,068
Dual specificity phosphatase inhibitor	0,309	0,016	0,352	0,011	0,339	0,012	0,372	0,009	0,354	0,010	0,268	0,024	0,429	0,005	0,424	0,005	0,248	0,029	0,241	0,030	0,250	0,028	0,236	0,032	0,317	0,015	NA	NA	0,123	0,089	0,115	0,099	0,235	0,032
EIF4E expression inhibitor	0,247	0,210	NA	NA	NA	NA	NA	NA	0,280	0,158	NA	NA	NA	NA	NA	NA	NA	NA	0,248	0,209	0,286	0,151	0,320	0,109	0,377	0,060	0,269	0,174	0,315	0,116	NA	NA	0,344	0,086
Electron-transferring-flavoprotein dehydrogenase inhibitor	0,373	0,141	0,305	0,206	NA	NA	NA	NA	NA	NA	NA	NA	NA	NA	NA	NA	NA	NA	NA	NA	0,296	0,217	NA	NA	0,337	0,172	0,268	0,253	0,283	0,233	NA	NA	NA	NA
Falcipain 3 inhibitor	NA	NA	NA	NA	NA	NA	NA	NA	NA	NA	NA	NA	NA	NA	NA	NA	NA	NA	0,387	0,005	NA	NA	NA	NA	NA	NA	NA	NA	0,213	0,060	0,319	0,012	0,216	0,057
Feruloyl esterase inhibitor	0,249	0,146	NA	NA	0,212	0,180	0,350	0,087	NA	NA	NA	NA	NA	NA	NA	NA	NA	NA	NA	NA	0,200	0,194	0,224	0,168	0,310	0,106	0,247	0,147	0,249	0,146	NA	NA	NA	NA
Focal adhesion kinase 1 inhibitor	NA	NA	0,199	0,048	0,214	0,039	0,166	0,079	0,232	0,029	0,157	0,090	NA	NA	NA	NA	NA	NA	NA	NA	NA	NA	NA	NA	NA	NA	NA	NA	NA	NA	NA	NA	NA	NA
Focal adhesion kinase 2 inhibitor	NA	NA	0,281	0,095	0,305	0,076	0,231	0,145	0,322	0,064	0,425	0,021	NA	NA	0,195	0,183	NA	NA	0,339	0,053	0,200	0,178	NA	NA	0,364	0,041	NA	NA	NA	NA	0,376	0,036	0,426	0,021
Focal adhesion kinase inhibitor	0,182	0,157	0,191	0,144	0,213	0,118	0,172	0,172	0,226	0,105	0,315	0,049	NA	NA	NA	NA	NA	NA	0,267	0,073	0,216	0,115	NA	NA	0,248	0,086	NA	NA	NA	NA	0,262	0,076	0,289	0,060
Fructose 5-dehydrogenase inhibitor	NA	NA	NA	NA	0,303	0,195	NA	NA	NA	NA	NA	NA	NA	NA	NA	NA	NA	NA	NA	NA	NA	NA	NA	NA	0,384	0,108	NA	NA	0,273	0,241	NA	NA	NA	NA
Fusarinine-C ornithinesterase inhibitor	0,313	0,252	NA	NA	NA	NA	NA	NA	0,462	0,113	NA	NA	NA	NA	NA	NA	NA	NA	NA	NA	NA	NA	NA	NA	NA	NA	NA	NA	NA	NA	NA	NA	NA	NA
Gamma-guanidinobutyraldehyde dehydrogenase inhibitor	0,304	0,104	0,265	0,139	NA	NA	0,217	0,204	0,217	0,203	NA	NA	NA	NA	NA	NA	NA	NA	NA	NA	0,345	0,078	0,336	0,083	0,403	0,053	0,278	0,126	0,342	0,080	NA	NA	NA	NA
Gastrin inhibitor	NA	NA	0,290	0,208	NA	NA	NA	NA	NA	NA	NA	NA	NA	NA	0,314	0,189	NA	NA	NA	NA	NA	NA	NA	NA	0,352	0,162	NA	NA	NA	NA	NA	NA	0,340	0,170
General pump inhibitor	0,291	0,284	NA	NA	0,340	0,213	NA	NA	NA	NA	NA	NA	NA	NA	NA	NA	0,386	0,154	NA	NA	NA	NA	NA	NA	0,314	0,249	NA	NA	NA	NA	NA	NA	NA	NA
Glucan endo-1,3-beta-D-glucosidase inhibitor	0,229	0,227	NA	NA	NA	NA	NA	NA	0,347	0,137	NA	NA	NA	NA	NA	NA	NA	NA	NA	NA	NA	NA	NA	NA	NA	NA	NA	NA	NA	NA	NA	NA	NA	NA
Glucan endo-1,6-beta-glucosidase inhibitor	0,294	0,126	0,213	0,197	NA	NA	NA	NA	0,503	0,052	NA	NA	NA	NA	NA	NA	NA	NA	NA	NA	0,224	0,184	NA	NA	0,343	0,100	NA	NA	0,222	0,186	NA	NA	NA	NA
Glutamyl endopeptidase II inhibitor	0,324	0,229	0,332	0,220	NA	NA	NA	NA	NA	NA	NA	NA	NA	NA	NA	NA	NA	NA	NA	NA	NA	NA	0,298	0,260	0,369	0,184	0,315	0,240	0,324	0,229	NA	NA	NA	NA
Glutathione thiolesterase inhibitor	0,485	0,055	0,415	0,073	0,295	0,124	0,315	0,112	0,279	0,134	NA	NA	0,233	0,171	0,226	0,177	NA	NA	NA	NA	0,365	0,090	0,301	0,120	0,597	0,034	0,227	0,176	0,385	0,083	NA	NA	NA	NA
Glycosylphosphatidylinositol phospholipase D inhibitor	NA	NA	NA	NA	NA	NA	NA	NA	NA	NA	NA	NA	NA	NA	0,277	0,238	NA	NA	NA	NA	NA	NA	NA	NA	0,753	0,022	0,339	0,185	NA	NA	NA	NA	0,512	0,095
HIF1A expression inhibitor	0,371	0,119	0,268	0,215	0,322	0,157	NA	NA	NA	NA	NA	NA	NA	NA	NA	NA	0,360	0,127	0,363	0,125	NA	NA	NA	NA	0,398	0,103	NA	NA	0,350	0,134	0,446	0,078	0,550	0,043
Histamine release inhibitor	NA	NA	NA	NA	NA	NA	NA	NA	NA	NA	NA	NA	NA	NA	0,240	0,195	0,227	0,208	NA	NA	0,244	0,191	NA	NA	0,342	0,125	0,492	0,040	NA	NA	NA	NA	NA	NA
Histidine kinase inhibitor	0,479	0,032	0,401	0,052	0,395	0,054	0,376	0,061	0,363	0,066	0,308	0,097	0,351	0,072	0,340	0,077	0,493	0,030	0,473	0,033	0,821	0,004	0,579	0,018	0,500	0,029	0,255	0,144	0,597	0,016	0,352	0,071	0,425	0,045
Histone acetyltransferase inhibitor	0,207	0,061	0,182	0,083	0,202	0,064	0,214	0,056	0,236	0,045	NA	NA	NA	NA	NA	NA	NA	NA	NA	NA	0,155	0,127	NA	NA	0,281	0,030	NA	NA	NA	NA	NA	NA	NA	NA
Histone deacetylase class III inhibitor	0,127	0,073	NA	NA	NA	NA	0,144	0,050	NA	NA	NA	NA	NA	NA	NA	NA	NA	NA	NA	NA	NA	NA	0,193	0,019	NA	NA	NA	NA	NA	NA	0,264	0,008	0,230	0,012
Histone deacetylase SIRT2 inhibitor	0,119	0,048	NA	NA	NA	NA	0,123	0,043	NA	NA	NA	NA	NA	NA	NA	NA	0,095	0,088	0,102	0,074	0,095	0,088	0,182	0,015	NA	NA	NA	NA	0,096	0,085	0,291	0,005	0,235	0,008
Hyponitrite reductase inhibitor	0,188	0,101	0,153	0,134	NA	NA	NA	NA	0,343	0,039	NA	NA	NA	NA	NA	NA	NA	NA	NA	NA	0,177	0,110	0,168	0,118	0,349	0,038	NA	NA	0,223	0,079	NA	NA	NA	NA
Isopenicillin-N epimerase inhibitor	0,291	0,079	0,207	0,160	NA	NA	NA	NA	NA	NA	NA	NA	NA	NA	NA	NA	NA	NA	0,262	0,099	0,265	0,096	0,236	0,123	0,231	0,129	0,243	0,116	0,370	0,046	NA	NA	0,206	0,161
Insulysin inhibitor	0,235	0,206	0,318	0,126	0,257	0,179	NA	NA	NA	NA	0,659	0,014	NA	NA	0,256	0,180	0,251	0,185	0,608	0,023	NA	NA	NA	NA	0,350	0,109	NA	NA	NA	NA	0,949	0,002	0,699	0,009
Kinase inhibitor	0,321	0,123	NA	NA	NA	NA	NA	NA	NA	NA	NA	NA	0,258	0,203	NA	NA	0,240	0,237	NA	NA	NA	NA	NA	NA	NA	NA	NA	NA	NA	NA	0,359	0,090	0,358	0,090
Leukopoiesis inhibitor	NA	NA	NA	NA	NA	NA	NA	NA	NA	NA	0,236	0,205	NA	NA	NA	NA	NA	NA	NA	NA	0,304	0,101	0,354	0,063	0,227	0,225	0,237	0,201	NA	NA	0,388	0,047	NA	NA
Leukotriene-B4 20-monooxygenase inhibitor	0,192	0,132	NA	NA	NA	NA	NA	NA	NA	NA	NA	NA	NA	NA	NA	NA	NA	NA	0,198	0,128	0,216	0,117	0,167	0,152	0,321	0,072	0,266	0,092	0,212	0,119	NA	NA	0,253	0,098
Lysase inhibitor	0,306	0,152	NA	NA	NA	NA	NA	NA	0,272	0,186	NA	NA	NA	NA	NA	NA	NA	NA	NA	NA	NA	NA	NA	NA	0,319	0,142	NA	NA	NA	NA	NA	NA	NA	NA
Maillard reaction inhibitor	0,312	0,043	0,271	0,074	0,296	0,053	0,223	0,135	0,312	0,043	0,252	0,095	0,240	0,110	0,232	0,120	0,255	0,091	0,266	0,079	0,373	0,019	0,231	0,123	0,231	0,123	NA	NA	0,514	0,005	NA	NA	NA	NA
Malate dehydrogenase (acceptor) inhibitor	0,302	0,120	0,235	0,199	0,248	0,180	NA	NA	NA	NA	NA	NA	NA	NA	NA	NA	0,268	0,154	NA	NA	0,271	0,151	0,226	0,215	0,379	0,070	0,263	0,160	0,238	0,195	NA	NA	NA	NA
Mannan endo-1,4-beta-mannosidase inhibitor	0,310	0,105	NA	NA	NA	NA	NA	NA	NA	NA	NA	NA	NA	NA	NA	NA	NA	NA	NA	NA	NA	NA	NA	NA	NA	NA	NA	NA	NA	NA	NA	NA	NA	NA
Mannotetraose 2-alpha-N-acetylglucosaminyltransferase inhibitor	0,340	0,145	NA	NA	NA	NA	NA	NA	NA	NA	NA	NA	NA	NA	NA	NA	NA	NA	NA	NA	NA	NA	0,268	0,209	NA	NA	0,559	0,052	NA	NA	NA	NA	NA	NA
MAO B inhibitor	NA	NA	NA	NA	NA	NA	NA	NA	NA	NA	NA	NA	NA	NA	NA	NA	0,090	0,024	0,179	0,008	NA	NA	NA	NA	NA	NA	NA	NA	NA	NA	NA	NA	0,082	0,027
MAO inhibitor	NA	NA	NA	NA	NA	NA	NA	NA	NA	NA	NA	NA	NA	NA	NA	NA	0,291	0,010	0,619	0,003	NA	NA	NA	NA	0,112	0,065	NA	NA	NA	NA	NA	NA	0,191	0,022
MAP kinase kinase 4 inhibitor	0,263	0,083	0,210	0,171	0,228	0,138	NA	NA	NA	NA	NA	NA	NA	NA	NA	NA	NA	NA	0,214	0,163	0,207	0,177	NA	NA	NA	NA	0,269	0,075	NA	NA	NA	NA	NA	NA
Mediator release inhibitor	0,243	0,140	0,417	0,033	0,406	0,037	0,329	0,072	0,267	0,119	NA	NA	NA	NA	0,210	0,168	0,294	0,096	NA	NA	NA	NA	NA	NA	0,314	0,082	0,316	0,081	NA	NA	NA	NA	NA	NA
MO15-related protein kinase Pfmrk inhibitor	0,245	0,050	0,190	0,098	0,169	0,125	0,255	0,045	0,267	0,038	NA	NA	NA	NA	NA	NA	NA	NA	NA	NA	0,199	0,088	0,165	0,131	NA	NA	NA	NA	NA	NA	NA	NA	NA	NA
NAD(P)+-arginine ADP-ribosyltransferase inhibitor	0,516	0,030	0,407	0,055	0,323	0,091	0,275	0,125	0,252	0,149	0,217	0,197	0,240	0,162	0,211	0,206	NA	NA	NA	NA	0,330	0,087	0,281	0,120	0,360	0,072	0,291	0,112	0,277	0,123	NA	NA	NA	NA
NADPH-cytochrome-c2 reductase inhibitor	0,382	0,123	0,294	0,202	NA	NA	NA	NA	NA	NA	NA	NA	NA	NA	NA	NA	NA	NA	NA	NA	0,281	0,218	0,273	0,228	0,303	0,191	NA	NA	0,297	0,198	NA	NA	NA	NA
NADPH-ferrihemoprotein reductase inhibitor	0,225	0,123	0,205	0,149	0,203	0,151	NA	NA	0,320	0,061	NA	NA	NA	NA	NA	NA	NA	NA	NA	NA	0,187	0,177	NA	NA	0,239	0,109	NA	NA	0,197	0,161	NA	NA	NA	NA
Neurotransmitter uptake inhibitor	0,492	0,064	0,450	0,084	0,427	0,097	0,437	0,091	0,423	0,099	0,392	0,119	0,442	0,088	0,504	0,059	0,418	0,102	0,314	0,193	NA	NA	NA	NA	0,389	0,122	NA	NA	NA	NA	NA	NA	0,325	0,180
N-hydroxyarylamine O-acetyltransferase inhibitor	0,271	0,153	0,238	0,205	0,247	0,189	NA	NA	0,341	0,084	NA	NA	NA	NA	NA	NA	NA	NA	NA	NA	NA	NA	NA	NA	0,265	0,162	0,240	0,202	0,233	0,215	NA	NA	NA	NA
Nicotinate dehydrogenase inhibitor	0,239	0,147	NA	NA	0,239	0,146	NA	NA	NA	NA	NA	NA	NA	NA	NA	NA	NA	NA	NA	NA	0,305	0,078	0,206	0,203	0,330	0,063	0,213	0,189	0,328	0,064	NA	NA	NA	NA
Nicotine dehydrogenase inhibitor	0,308	0,143	0,253	0,218	0,335	0,116	NA	NA	NA	NA	NA	NA	NA	NA	NA	NA	NA	NA	NA	NA	0,286	0,169	0,287	0,169	0,484	0,032	0,248	0,227	0,325	0,125	NA	NA	NA	NA
Nitrate reductase (cytochrome) inhibitor	0,338	0,103	0,408	0,071	0,300	0,130	0,224	0,219	0,234	0,204	NA	NA	NA	NA	0,235	0,202	0,328	0,110	NA	NA	0,258	0,172	0,258	0,173	0,657	0,019	0,316	0,118	0,307	0,124	NA	NA	0,262	0,168
Nitrite reductase [NAD(P)H] inhibitor	0,221	0,156	0,226	0,149	0,258	0,112	NA	NA	0,364	0,047	NA	NA	NA	NA	NA	NA	NA	NA	NA	NA	NA	NA	0,206	0,182	0,285	0,089	NA	NA	0,204	0,184	NA	NA	NA	NA
N-methylhydantoinase (ATP-hydrolysing) inhibitor	0,381	0,041	0,173	0,137	NA	NA	NA	NA	0,163	0,149	NA	NA	NA	NA	NA	NA	NA	NA	NA	NA	0,251	0,083	0,282	0,070	0,311	0,060	NA	NA	0,461	0,027	NA	NA	NA	NA
Rubredoxin-NAD+ reductase inhibitor	0,311	0,138	0,288	0,174	0,319	0,128	0,250	0,250	0,412	0,049	NA	NA	NA	NA	NA	NA	0,275	0,198	NA	NA	0,267	0,213	0,286	0,178	0,347	0,096	NA	NA	0,276	0,195	NA	NA	NA	NA
Saccharopepsin inhibitor	NA	NA	NA	NA	NA	NA	NA	NA	0,307	0,234	NA	NA	NA	NA	NA	NA	NA	NA	NA	NA	NA	NA	NA	NA	NA	NA	0,366	0,187	NA	NA	NA	NA	NA	NA
Salicylate 1-monooxygenase inhibitor	0,243	0,076	0,151	0,143	NA	NA	NA	NA	0,352	0,040	NA	NA	NA	NA	NA	NA	NA	NA	NA	NA	0,219	0,089	0,215	0,091	0,472	0,019	NA	NA	0,278	0,061	NA	NA	NA	NA
S-formylglutathione hydrolase inhibitor	0,257	0,169	NA	NA	NA	NA	NA	NA	0,341	0,092	NA	NA	NA	NA	NA	NA	NA	NA	NA	NA	NA	NA	NA	NA	0,245	0,184	NA	NA	NA	NA	NA	NA	NA	NA
Steroid synthesis inhibitor	0,300	0,046	0,258	0,081	0,214	0,140	0,204	0,158	0,202	0,162	NA	NA	NA	NA	NA	NA	NA	NA	NA	NA	NA	NA	NA	NA	NA	NA	NA	NA	NA	NA	NA	NA	NA	NA
Taurine-2-oxoglutarate transaminase inhibitor	NA	NA	NA	NA	NA	NA	NA	NA	NA	NA	NA	NA	NA	NA	NA	NA	NA	NA	NA	NA	NA	NA	NA	NA	0,251	0,080	0,206	0,112	0,243	0,084	NA	NA	0,332	0,044
Testosterone 17beta-dehydrogenase (NADP+) inhibitor	0,510	0,128	NA	NA	NA	NA	NA	NA	NA	NA	NA	NA	NA	NA	NA	NA	NA	NA	NA	NA	NA	NA	0,349	0,218	0,296	0,261	NA	NA	0,293	0,263	NA	NA	NA	NA
Tryptophan 2,3-dioxygenase inhibitor	0,351	0,023	0,294	0,050	NA	NA	0,200	0,171	0,198	0,175	NA	NA	NA	NA	0,219	0,135	NA	NA	NA	NA	NA	NA	0,245	0,098	0,336	0,028	NA	NA	NA	NA	NA	NA	NA	NA
Ubiquinol-cytochrome-c reductase inhibitor	NA	NA	NA	NA	NA	NA	NA	NA	0,431	0,184	NA	NA	NA	NA	NA	NA	NA	NA	NA	NA	NA	NA	NA	NA	0,542	0,132	NA	NA	NA	NA	NA	NA	0,302	0,263
UDP-N-acetylglucosamine 4-epimerase inhibitor	0,316	0,155	NA	NA	NA	NA	NA	NA	NA	NA	NA	NA	NA	NA	NA	NA	NA	NA	NA	NA	NA	NA	NA	NA	0,241	0,240	0,338	0,137	NA	NA	NA	NA	NA	NA
Trans-acenaphthene-1,2-diol dehydrogenase inhibitor	0,428	0,076	0,448	0,066	0,452	0,064	0,437	0,071	0,426	0,078	0,369	0,123	0,397	0,098	0,403	0,093	0,317	0,189	NA	NA	0,424	0,079	0,408	0,090	0,442	0,069	NA	NA	0,427	0,077	NA	NA	NA	NA
Transcription factor inhibitor	NA	NA	NA	NA	NA	NA	NA	NA	NA	NA	NA	NA	0,238	0,093	0,378	0,028	0,166	0,160	0,395	0,025	NA	NA	NA	NA	0,545	0,009	0,278	0,067	NA	NA	0,381	0,028	0,281	0,065
Transcription factor NF kappa A inhibitor	0,285	0,041	0,248	0,081	0,226	0,119	0,206	0,162	0,204	0,168	NA	NA	NA	NA	NA	NA	0,219	0,133	NA	NA	0,260	0,066	0,253	0,074	0,220	0,129	0,234	0,103	0,292	0,036	NA	NA	NA	NA
Transcription factor STAT inhibitor	NA	NA	NA	NA	NA	NA	NA	NA	NA	NA	NA	NA	NA	NA	0,202	0,144	NA	NA	0,221	0,127	NA	NA	NA	NA	0,421	0,039	NA	NA	NA	NA	0,453	0,032	0,309	0,077
Transcription factor STAT3 inhibitor	NA	NA	NA	NA	NA	NA	NA	NA	NA	NA	NA	NA	NA	NA	0,231	0,106	NA	NA	0,291	0,071	NA	NA	NA	NA	0,409	0,031	NA	NA	NA	NA	0,460	0,023	0,351	0,045
Xanthine oxidase inhibitor	0,145	0,053	0,130	0,063	0,136	0,058	NA	NA	0,209	0,026	NA	NA	NA	NA	NA	NA	0,143	0,054	NA	NA	0,288	0,009	0,239	0,017	NA	NA	0,108	0,086	0,187	0,034	NA	NA	NA	NA
Thiol protease inhibitor	0,178	0,120	0,161	0,142	NA	NA	0,228	0,075	0,154	0,154	NA	NA	NA	NA	0,170	0,130	0,157	0,147	0,718	0,004	0,201	0,098	0,293	0,043	0,220	0,082	NA	NA	NA	NA	0,698	0,004	0,700	0,004
Thioredoxin inhibitor	0,418	0,092	0,249	0,231	NA	NA	NA	NA	NA	NA	NA	NA	NA	NA	0,247	0,233	NA	NA	NA	NA	0,293	0,181	0,525	0,049	0,555	0,040	0,314	0,163	0,356	0,130	NA	NA	0,439	0,082
Thymidylate 5'-phosphatase inhibitor	0,299	0,123	0,248	0,194	NA	NA	NA	NA	0,376	0,065	NA	NA	NA	NA	NA	NA	NA	NA	NA	NA	NA	NA	NA	NA	0,243	0,203	NA	NA	NA	NA	NA	NA	NA	NA
Oxidoreductase inhibitor	0,451	0,091	0,280	0,180	NA	NA	NA	NA	NA	NA	NA	NA	NA	NA	NA	NA	0,404	0,107	NA	NA	NA	NA	NA	NA	NA	NA	NA	NA	NA	NA	NA	NA	NA	NA
Prion diseases treatment	0,287	0,140	0,261	0,206	0,286	0,141	NA	NA	0,305	0,101	NA	NA	NA	NA	0,258	0,213	NA	NA	NA	NA	NA	NA	NA	NA	0,346	0,044	NA	NA	NA	NA	NA	NA	NA	NA
P-benzoquinone reductase (NADPH) inhibitor	0,241	0,123	0,242	0,122	0,200	0,182	0,196	0,190	0,329	0,061	NA	NA	NA	NA	NA	NA	0,262	0,103	NA	NA	0,238	0,127	0,219	0,151	0,385	0,041	NA	NA	0,258	0,106	NA	NA	0,208	0,168
PfA-M1 aminopeptidase inhibitor	NA	NA	NA	NA	NA	NA	0,177	0,119	NA	NA	NA	NA	NA	NA	0,165	0,130	NA	NA	0,509	0,010	NA	NA	NA	NA	0,357	0,033	NA	NA	0,197	0,103	0,386	0,026	0,428	0,019
Phosphatase inhibitor	NA	NA	0,333	0,262	NA	NA	NA	NA	NA	NA	NA	NA	0,549	0,076	0,510	0,102	NA	NA	NA	NA	NA	NA	0,339	0,255	0,331	0,265	NA	NA	NA	NA	NA	NA	0,368	0,223
Phospholipid-translocating ATPase inhibitor	NA	NA	NA	NA	NA	NA	NA	NA	0,319	0,180	NA	NA	NA	NA	NA	NA	NA	NA	NA	NA	NA	NA	NA	NA	0,303	0,197	NA	NA	NA	NA	NA	NA	NA	NA
Phthalate 4,5-dioxygenase inhibitor	0,312	0,210	NA	NA	NA	NA	NA	NA	NA	NA	NA	NA	NA	NA	NA	NA	NA	NA	NA	NA	0,301	0,223	0,286	0,240	0,573	0,045	0,295	0,230	0,351	0,171	NA	NA	0,342	0,179
Pin1 inhibitor	0,399	0,087	NA	NA	0,347	0,122	NA	NA	NA	NA	NA	NA	NA	NA	NA	NA	NA	NA	NA	NA	0,292	0,174	0,342	0,127	0,309	0,156	NA	NA	0,287	0,179	NA	NA	NA	NA
Platelet derived growth factor receptor kinase inhibitor	0,447	0,048	NA	NA	NA	NA	NA	NA	NA	NA	NA	NA	NA	NA	NA	NA	NA	NA	NA	NA	NA	NA	NA	NA	NA	NA	NA	NA	0,280	0,190	NA	NA	NA	NA
Protein-tyrosine kinase p55(blk) inhibitor	NA	NA	0,210	0,080	0,223	0,065	0,220	0,068	NA	NA	0,242	0,047	0,196	0,099	0,258	0,036	NA	NA	0,170	0,144	NA	NA	NA	NA	0,188	0,112	NA	NA	NA	NA	NA	NA	0,234	0,054
Proto-oncogene tyrosine-protein kinase Fgr inhibitor	NA	NA	NA	NA	NA	NA	NA	NA	NA	NA	0,284	0,058	0,230	0,098	0,309	0,045	NA	NA	NA	NA	NA	NA	NA	NA	0,361	0,024	NA	NA	NA	NA	0,222	0,106	0,446	0,008
Pseudolysin inhibitor	0,403	0,163	NA	NA	NA	NA	NA	NA	NA	NA	NA	NA	NA	NA	NA	NA	NA	NA	NA	NA	NA	NA	0,350	0,222	0,433	0,137	0,397	0,169	0,316	0,266	NA	NA	NA	NA
Pterin deaminase inhibitor	0,374	0,092	NA	NA	NA	NA	NA	NA	NA	NA	NA	NA	NA	NA	NA	NA	NA	NA	NA	NA	0,510	0,046	0,415	0,075	0,296	0,139	0,288	0,144	0,378	0,091	NA	NA	NA	NA
RELA expression inhibitor	0,275	0,119	0,220	0,202	0,293	0,101	NA	NA	NA	NA	NA	NA	NA	NA	NA	NA	NA	NA	0,306	0,088	NA	NA	0,221	0,201	0,226	0,191	NA	NA	NA	NA	0,276	0,118	0,316	0,080
RET inhibitor	0,263	0,033	NA	NA	NA	NA	NA	NA	NA	NA	NA	NA	NA	NA	NA	NA	NA	NA	NA	NA	0,342	0,010	NA	NA	NA	NA	0,201	0,082	NA	NA	NA	NA	NA	NA
Retinoic acid metabolism inhibitor	0,233	0,177	NA	NA	0,234	0,176	NA	NA	NA	NA	NA	NA	NA	NA	NA	NA	NA	NA	NA	NA	0,220	0,194	0,259	0,145	0,399	0,036	0,225	0,187	0,220	0,193	NA	NA	0,322	0,083
Ribulose-phosphate 3-epimerase inhibitor	0,350	0,171	0,286	0,241	NA	NA	NA	NA	NA	NA	NA	NA	NA	NA	NA	NA	NA	NA	NA	NA	NA	NA	NA	NA	0,295	0,230	0,371	0,153	0,271	0,261	NA	NA	NA	NA
DNA & RNA synthesis
RNA directed DNA polymerase inhibitor	0,215	0,075	0,204	0,085	0,180	0,120	0,217	0,072	0,177	0,125	NA	NA	0,167	0,146	0,170	0,138	NA	NA	NA	NA	0,166	0,146	NA	NA	NA	NA	NA	NA	NA	NA	NA	NA	NA	NA
RNA synthesis inhibitor	0,226	0,132	0,193	0,184	0,203	0,167	NA	NA	NA	NA	NA	NA	NA	NA	NA	NA	NA	NA	NA	NA	NA	NA	NA	NA	NA	NA	0,204	0,165	0,193	0,185	NA	NA	NA	NA
DNA-(apurinic or apyrimidinic site) lyase inhibitor	NA	NA	NA	NA	NA	NA	NA	NA	NA	NA	NA	NA	NA	NA	NA	NA	NA	NA	NA	NA	NA	NA	NA	NA	0,188	0,178	NA	NA	NA	NA	NA	NA	NA	NA
DNA-dependent protein kinase inhibitor	NA	NA	NA	NA	NA	NA	NA	NA	NA	NA	NA	NA	NA	NA	NA	NA	NA	NA	NA	NA	NA	NA	NA	NA	NA	NA	0,028	0,005	NA	NA	NA	NA	NA	NA
DNA directed RNA polymerase inhibitor	0,299	0,017	0,310	0,016	0,260	0,023	0,302	0,017	0,287	0,019	0,202	0,036	0,210	0,033	0,228	0,029	0,167	0,062	NA	NA	0,216	0,031	0,161	0,070	0,129	0,118	NA	NA	0,163	0,067	NA	NA	NA	NA
DNA polymerase I inhibitor	0,306	0,058	0,303	0,060	0,307	0,057	0,297	0,067	0,302	0,062	0,262	0,121	0,255	0,138	0,246	0,160	0,228	0,210	NA	NA	0,228	0,209	NA	NA	NA	NA	NA	NA	NA	NA	NA	NA	NA	NA
DNA repair enzyme inhibitor	NA	NA	NA	NA	NA	NA	NA	NA	NA	NA	NA	NA	NA	NA	NA	NA	NA	NA	NA	NA	NA	NA	NA	NA	0,080	0,045	NA	NA	NA	NA	NA	NA	NA	NA
DNA synthesis inhibitor	NA	NA	NA	NA	NA	NA	NA	NA	NA	NA	NA	NA	NA	NA	NA	NA	NA	NA	NA	NA	NA	NA	0,223	0,115	NA	NA	NA	NA	NA	NA	NA	NA	NA	NA
Cytochrome P450 enzymes
Cytochrome P450 stimulant	0,271	0,157	NA	NA	NA	NA	NA	NA	0,244	0,207	NA	NA	NA	NA	NA	NA	NA	NA	NA	NA	NA	NA	NA	NA	0,237	0,224	0,266	0,166	0,236	0,225	0,242	0,212	0,287	0,136
Cytochrome P450 inhibitor	NA	NA	0,210	0,126	0,180	0,156	NA	NA	NA	NA	NA	NA	NA	NA	NA	NA	NA	NA	NA	NA	NA	NA	NA	NA	0,179	0,157	NA	NA	NA	NA	NA	NA	NA	NA
CYP19 inhibitor	NA	NA	NA	NA	NA	NA	NA	NA	NA	NA	NA	NA	NA	NA	NA	NA	0,100	0,088	NA	NA	NA	NA	NA	NA	NA	NA	NA	NA	NA	NA	NA	NA	NA	NA
CYP19A1 expression inhibitor	NA	NA	NA	NA	NA	NA	NA	NA	0,258	0,163	NA	NA	NA	NA	NA	NA	NA	NA	NA	NA	NA	NA	NA	NA	0,226	0,219	NA	NA	NA	NA	0,282	0,129	0,260	0,160
CYP1A inducer	0,224	0,067	NA	NA	NA	NA	NA	NA	NA	NA	NA	NA	NA	NA	NA	NA	NA	NA	0,156	0,136	0,150	0,145	0,206	0,080	0,233	0,062	0,285	0,042	0,252	0,053	NA	NA	0,194	0,090
CYP1A inhibitor	0,203	0,184	NA	NA	0,210	0,174	NA	NA	NA	NA	NA	NA	NA	NA	NA	NA	NA	NA	0,237	0,137	NA	NA	0,320	0,062	0,318	0,063	0,221	0,158	NA	NA	0,365	0,038	0,449	0,017
CYP1A substrate	NA	NA	NA	NA	NA	NA	NA	NA	NA	NA	NA	NA	NA	NA	NA	NA	NA	NA	0,245	0,134	NA	NA	NA	NA	0,205	0,178	0,249	0,130	NA	NA	0,552	0,021	0,254	0,126
CYP1A1 inducer	NA	NA	NA	NA	NA	NA	NA	NA	NA	NA	NA	NA	NA	NA	NA	NA	NA	NA	NA	NA	NA	NA	0,123	0,122	0,213	0,051	0,155	0,089	NA	NA	NA	NA	NA	NA
CYP1A1 inhibitor	NA	NA	NA	NA	0,206	0,092	NA	NA	NA	NA	NA	NA	NA	NA	NA	NA	NA	NA	0,168	0,148	NA	NA	NA	NA	0,266	0,039	NA	NA	NA	NA	0,218	0,077	0,297	0,025
CYP1A1 substrate	NA	NA	NA	NA	NA	NA	NA	NA	0,175	0,149	NA	NA	NA	NA	NA	NA	NA	NA	NA	NA	NA	NA	NA	NA	0,197	0,128	0,168	0,158	NA	NA	0,394	0,027	0,200	0,125
CYP1A2 inducer	0,242	0,052	NA	NA	NA	NA	NA	NA	NA	NA	NA	NA	NA	NA	NA	NA	NA	NA	0,248	0,049	0,170	0,132	0,223	0,065	0,170	0,134	0,350	0,020	0,265	0,042	0,221	0,066	0,267	0,041
CYP1A2 inhibitor	0,205	0,172	NA	NA	0,208	0,167	NA	NA	NA	NA	NA	NA	NA	NA	NA	NA	NA	NA	0,222	0,149	NA	NA	0,330	0,054	0,328	0,055	0,212	0,161	0,192	0,189	0,355	0,042	0,438	0,018
CYP1A2 substrate	NA	NA	NA	NA	NA	NA	NA	NA	NA	NA	NA	NA	NA	NA	NA	NA	NA	NA	NA	NA	NA	NA	NA	NA	0,218	0,175	0,240	0,145	NA	NA	0,564	0,018	0,259	0,123
CYP1A3 substrate	NA	NA	NA	NA	NA	NA	NA	NA	NA	NA	NA	NA	NA	NA	NA	NA	NA	NA	NA	NA	NA	NA	NA	NA	NA	NA	0,143	0,036	NA	NA	NA	NA	NA	NA
CYP1B substrate	NA	NA	NA	NA	NA	NA	NA	NA	NA	NA	NA	NA	NA	NA	NA	NA	NA	NA	NA	NA	NA	NA	NA	NA	0,196	0,061	0,151	0,109	NA	NA	NA	NA	NA	NA
CYP1B1 substrate	NA	NA	NA	NA	NA	NA	NA	NA	NA	NA	NA	NA	NA	NA	NA	NA	NA	NA	NA	NA	NA	NA	NA	NA	0,171	0,079	0,138	0,127	NA	NA	NA	NA	NA	NA
CYP26 inhibitor	NA	NA	NA	NA	NA	NA	NA	NA	NA	NA	NA	NA	NA	NA	NA	NA	NA	NA	NA	NA	NA	NA	NA	NA	0,090	0,039	NA	NA	NA	NA	NA	NA	NA	NA
CYP2A substrate	NA	NA	NA	NA	NA	NA	NA	NA	NA	NA	NA	NA	NA	NA	NA	NA	NA	NA	NA	NA	NA	NA	NA	NA	NA	NA	NA	NA	NA	NA	0,622	0,017	NA	NA
CYP2A1 substrate	NA	NA	NA	NA	NA	NA	NA	NA	NA	NA	0,238	0,207	NA	NA	NA	NA	NA	NA	NA	NA	NA	NA	NA	NA	NA	NA	NA	NA	NA	NA	0,527	0,029	NA	NA
CYP2A10 substrate	NA	NA	NA	NA	NA	NA	NA	NA	NA	NA	NA	NA	NA	NA	NA	NA	0,283	0,021	0,176	0,060	NA	NA	NA	NA	NA	NA	0,278	0,022	NA	NA	0,169	0,066	0,189	0,051
CYP2A11 substrate	NA	NA	NA	NA	NA	NA	NA	NA	NA	NA	NA	NA	NA	NA	NA	NA	0,425	0,024	0,302	0,044	NA	NA	NA	NA	NA	NA	0,242	0,065	NA	NA	0,283	0,049	0,325	0,039
CYP2A2 substrate	NA	NA	NA	NA	NA	NA	NA	NA	NA	NA	0,223	0,081	NA	NA	NA	NA	NA	NA	NA	NA	NA	NA	NA	NA	NA	NA	0,156	0,133	NA	NA	0,642	0,011	NA	NA
CYP2A4 substrate	NA	NA	NA	NA	NA	NA	NA	NA	NA	NA	NA	NA	NA	NA	NA	NA	0,218	0,195	NA	NA	NA	NA	NA	NA	0,210	0,207	0,358	0,075	NA	NA	NA	NA	NA	NA
CYP2A5 substrate	0,305	0,069	0,224	0,127	0,202	0,148	NA	NA	NA	NA	NA	NA	NA	NA	NA	NA	0,272	0,090	NA	NA	NA	NA	NA	NA	NA	NA	0,193	0,159	NA	NA	NA	NA	NA	NA
CYP2A6 inhibitor	NA	NA	NA	NA	NA	NA	NA	NA	NA	NA	NA	NA	NA	NA	NA	NA	NA	NA	0,234	0,043	NA	NA	0,402	0,013	0,572	0,005	0,159	0,076	0,141	0,086	0,311	0,022	0,602	0,004
CYP2A6 substrate	NA	NA	NA	NA	NA	NA	NA	NA	NA	NA	NA	NA	NA	NA	NA	NA	NA	NA	NA	NA	NA	NA	NA	NA	NA	NA	NA	NA	NA	NA	0,681	0,011	NA	NA
CYP2A8 substrate	NA	NA	NA	NA	NA	NA	NA	NA	NA	NA	0,416	0,054	NA	NA	NA	NA	NA	NA	NA	NA	NA	NA	NA	NA	0,201	0,190	NA	NA	NA	NA	0,651	0,012	NA	NA
CYP2B substrate	NA	NA	NA	NA	NA	NA	NA	NA	NA	NA	NA	NA	NA	NA	NA	NA	NA	NA	NA	NA	NA	NA	NA	NA	NA	NA	NA	NA	NA	NA	0,346	0,050	NA	NA
CYP2B1 substrate	NA	NA	NA	NA	NA	NA	NA	NA	NA	NA	NA	NA	NA	NA	NA	NA	NA	NA	NA	NA	NA	NA	NA	NA	NA	NA	NA	NA	NA	NA	0,331	0,019	NA	NA
CYP2B10 substrate	NA	NA	NA	NA	NA	NA	NA	NA	NA	NA	NA	NA	NA	NA	NA	NA	NA	NA	NA	NA	NA	NA	NA	NA	NA	NA	0,197	0,175	NA	NA	NA	NA	NA	NA
CYP2B2 substrate	NA	NA	NA	NA	NA	NA	NA	NA	NA	NA	NA	NA	NA	NA	NA	NA	NA	NA	NA	NA	NA	NA	NA	NA	NA	NA	0,176	0,167	NA	NA	0,318	0,022	NA	NA
CYP2B5 substrate	NA	NA	NA	NA	NA	NA	NA	NA	NA	NA	NA	NA	NA	NA	NA	NA	NA	NA	NA	NA	NA	NA	NA	NA	NA	NA	0,378	0,063	NA	NA	NA	NA	NA	NA
CYP2B6 substrate	NA	NA	NA	NA	NA	NA	NA	NA	NA	NA	NA	NA	NA	NA	NA	NA	NA	NA	NA	NA	NA	NA	NA	NA	NA	NA	0,219	0,152	NA	NA	0,417	0,050	NA	NA
CYP2C substrate	NA	NA	NA	NA	NA	NA	NA	NA	NA	NA	NA	NA	NA	NA	NA	NA	NA	NA	NA	NA	NA	NA	NA	NA	0,328	0,106	NA	NA	NA	NA	0,508	0,042	NA	NA
CYP2C10 substrate	NA	NA	NA	NA	NA	NA	NA	NA	NA	NA	NA	NA	NA	NA	NA	NA	NA	NA	NA	NA	NA	NA	NA	NA	0,382	0,034	NA	NA	NA	NA	NA	NA	NA	NA
CYP2C11 substrate	0,235	0,110	0,290	0,077	0,226	0,116	NA	NA	NA	NA	0,274	0,084	NA	NA	NA	NA	NA	NA	NA	NA	NA	NA	NA	NA	NA	NA	NA	NA	NA	NA	0,414	0,039	NA	NA
CYP2C12 substrate	0,790	0,039	0,647	0,066	0,567	0,078	0,283	0,165	0,252	0,192	NA	NA	0,248	0,196	NA	NA	0,435	0,101	NA	NA	NA	NA	NA	NA	0,228	0,219	0,283	0,165	NA	NA	NA	NA	NA	NA
CYP2C18 substrate	NA	NA	NA	NA	NA	NA	NA	NA	NA	NA	0,239	0,128	NA	NA	NA	NA	NA	NA	NA	NA	NA	NA	NA	NA	0,335	0,076	NA	NA	NA	NA	0,419	0,043	NA	NA
CYP2C19 inducer	0,390	0,046	0,299	0,145	0,261	0,234	NA	NA	NA	NA	0,270	0,209	0,324	0,106	NA	NA	0,261	0,232	0,258	0,241	NA	NA	0,270	0,207	0,308	0,130	NA	NA	0,282	0,179	0,336	0,092	NA	NA
CYP2C19 inhibitor	NA	NA	NA	NA	NA	NA	NA	NA	NA	NA	NA	NA	NA	NA	NA	NA	NA	NA	NA	NA	NA	NA	0,265	0,095	0,370	0,028	NA	NA	NA	NA	NA	NA	NA	NA
CYP2C19 substrate	NA	NA	NA	NA	NA	NA	NA	NA	NA	NA	NA	NA	NA	NA	NA	NA	NA	NA	NA	NA	NA	NA	NA	NA	NA	NA	NA	NA	NA	NA	0,326	0,074	NA	NA
CYP2C29 substrate	0,212	0,164	0,230	0,128	NA	NA	NA	NA	NA	NA	NA	NA	NA	NA	NA	NA	NA	NA	NA	NA	NA	NA	NA	NA	NA	NA	NA	NA	NA	NA	NA	NA	NA	NA
CYP2C3 substrate	NA	NA	NA	NA	NA	NA	NA	NA	NA	NA	NA	NA	NA	NA	NA	NA	NA	NA	NA	NA	NA	NA	0,184	0,170	NA	NA	0,215	0,111	0,209	0,122	NA	NA	NA	NA
CYP2C8 inducer	NA	NA	NA	NA	NA	NA	NA	NA	NA	NA	NA	NA	NA	NA	NA	NA	0,150	0,091	NA	NA	NA	NA	NA	NA	NA	NA	NA	NA	NA	NA	NA	NA	NA	NA
CYP2C8 inhibitor	NA	NA	NA	NA	NA	NA	NA	NA	NA	NA	NA	NA	NA	NA	NA	NA	NA	NA	NA	NA	NA	NA	NA	NA	0,384	0,136	0,394	0,128	NA	NA	NA	NA	NA	NA
CYP2C8 substrate	0,330	0,117	0,311	0,137	0,298	0,151	NA	NA	0,336	0,112	0,328	0,119	NA	NA	NA	NA	0,233	0,222	NA	NA	NA	NA	NA	NA	0,327	0,121	NA	NA	NA	NA	0,287	0,163	NA	NA
CYP2C9 inducer	NA	NA	NA	NA	NA	NA	NA	NA	NA	NA	NA	NA	NA	NA	NA	NA	NA	NA	NA	NA	NA	NA	NA	NA	NA	NA	0,317	0,108	NA	NA	NA	NA	NA	NA
CYP2C9 inhibitor	0,311	0,050	0,323	0,045	0,248	0,088	0,259	0,080	0,263	0,078	0,192	0,147	0,183	0,163	NA	NA	0,182	0,164	NA	NA	NA	NA	NA	NA	0,287	0,063	NA	NA	NA	NA	NA	NA	NA	NA
CYP2C9 substrate	0,212	0,193	NA	NA	NA	NA	NA	NA	NA	NA	NA	NA	NA	NA	NA	NA	NA	NA	NA	NA	NA	NA	NA	NA	0,479	0,045	NA	NA	NA	NA	0,428	0,057	NA	NA
CYP2D15 substrate	NA	NA	NA	NA	NA	NA	NA	NA	NA	NA	NA	NA	NA	NA	NA	NA	NA	NA	NA	NA	NA	NA	NA	NA	0,284	0,217	0,311	0,175	0,264	0,254	NA	NA	NA	NA
CYP2D16 substrate	NA	NA	NA	NA	NA	NA	NA	NA	NA	NA	NA	NA	NA	NA	NA	NA	NA	NA	NA	NA	NA	NA	0,245	0,203	0,254	0,192	0,303	0,140	0,248	0,199	NA	NA	NA	NA
CYP2E1 inducer	NA	NA	NA	NA	NA	NA	NA	NA	NA	NA	NA	NA	NA	NA	NA	NA	NA	NA	NA	NA	NA	NA	NA	NA	NA	NA	0,383	0,054	0,261	0,146	NA	NA	NA	NA
CYP2E1 inhibitor	NA	NA	NA	NA	NA	NA	NA	NA	NA	NA	NA	NA	NA	NA	NA	NA	NA	NA	NA	NA	NA	NA	0,233	0,045	0,584	0,006	NA	NA	NA	NA	NA	NA	NA	NA
CYP2F1 substrate	0,314	0,083	NA	NA	NA	NA	NA	NA	NA	NA	NA	NA	NA	NA	NA	NA	NA	NA	0,214	0,136	0,181	0,165	0,248	0,114	0,308	0,086	0,455	0,040	0,180	0,165	0,226	0,127	0,253	0,111
CYP2H substrate	NA	NA	NA	NA	NA	NA	NA	NA	NA	NA	NA	NA	NA	NA	NA	NA	NA	NA	NA	NA	NA	NA	NA	NA	NA	NA	0,377	0,246	NA	NA	NA	NA	NA	NA
CYP2J2 substrate	NA	NA	NA	NA	NA	NA	NA	NA	NA	NA	NA	NA	NA	NA	NA	NA	NA	NA	NA	NA	NA	NA	NA	NA	NA	NA	NA	NA	NA	NA	NA	NA	NA	NA
CYP3A inducer	0,282	0,108	0,212	0,195	0,228	0,171	NA	NA	NA	NA	NA	NA	NA	NA	NA	NA	NA	NA	NA	NA	NA	NA	NA	NA	NA	NA	0,241	0,154	NA	NA	0,227	0,172	0,216	0,188
CYP3A substrate	NA	NA	NA	NA	NA	NA	NA	NA	NA	NA	NA	NA	NA	NA	NA	NA	NA	NA	NA	NA	NA	NA	NA	NA	NA	NA	NA	NA	NA	NA	0,321	0,128	NA	NA
CYP3A1 substrate	NA	NA	NA	NA	NA	NA	NA	NA	NA	NA	NA	NA	NA	NA	NA	NA	NA	NA	NA	NA	NA	NA	NA	NA	NA	NA	NA	NA	NA	NA	0,526	0,039	NA	NA
CYP3A2 substrate	NA	NA	NA	NA	NA	NA	NA	NA	NA	NA	NA	NA	NA	NA	NA	NA	NA	NA	NA	NA	NA	NA	NA	NA	NA	NA	0,370	0,163	NA	NA	0,519	0,065	NA	NA
CYP3A3 substrate	NA	NA	NA	NA	NA	NA	NA	NA	0,263	0,139	0,233	0,172	NA	NA	NA	NA	NA	NA	NA	NA	NA	NA	NA	NA	NA	NA	NA	NA	NA	NA	0,297	0,110	NA	NA
CYP3A4 inducer	0,303	0,101	0,233	0,186	0,252	0,159	NA	NA	NA	NA	NA	NA	NA	NA	NA	NA	NA	NA	NA	NA	NA	NA	NA	NA	0,223	0,200	0,258	0,151	NA	NA	0,249	0,163	0,238	0,179
CYP3A4 substrate	NA	NA	NA	NA	NA	NA	NA	NA	NA	NA	NA	NA	NA	NA	NA	NA	NA	NA	NA	NA	NA	NA	NA	NA	NA	NA	NA	NA	NA	NA	0,338	0,124	NA	NA
CYP3A7 substrate	NA	NA	NA	NA	NA	NA	NA	NA	NA	NA	NA	NA	NA	NA	NA	NA	NA	NA	NA	NA	NA	NA	NA	NA	NA	NA	0,218	0,164	NA	NA	0,441	0,023	NA	NA
CYP4A11 substrate	NA	NA	NA	NA	NA	NA	NA	NA	NA	NA	NA	NA	NA	NA	NA	NA	NA	NA	NA	NA	NA	NA	NA	NA	0,327	0,107	NA	NA	NA	NA	NA	NA	NA	NA
CYP7 inhibitor	NA	NA	NA	NA	NA	NA	NA	NA	NA	NA	NA	NA	NA	NA	NA	NA	NA	NA	NA	NA	NA	NA	NA	NA	0,246	0,165	NA	NA	NA	NA	NA	NA	NA	NA
Antioxidant
Oxygen scavenger	0,594	0,024	0,445	0,072	0,366	0,117	0,303	0,176	0,278	0,209	0,260	0,234	0,280	0,206	NA	NA	0,270	0,219	NA	NA	NA	NA	NA	NA	0,262	0,231	NA	NA	NA	NA	NA	NA	NA	NA
Others
UGT1A6 substrate	0,290	0,049	0,309	0,043	0,271	0,056	0,266	0,059	0,314	0,042	NA	NA	NA	NA	NA	NA	0,171	0,125	NA	NA	0,229	0,077	0,220	0,083	0,214	0,086	NA	NA	0,173	0,122	NA	NA	NA	NA
UGT1A9 substrate	0,226	0,116	0,281	0,082	0,276	0,085	0,246	0,103	0,312	0,066	NA	NA	NA	NA	NA	NA	NA	NA	NA	NA	NA	NA	NA	NA	0,261	0,093	NA	NA	NA	NA	NA	NA	NA	NA
UGT2B12 substrate	0,420	0,040	0,390	0,051	0,447	0,032	0,369	0,060	0,656	0,006	0,308	0,099	0,333	0,081	0,341	0,076	0,308	0,099	NA	NA	0,408	0,044	0,395	0,049	0,524	0,017	NA	NA	0,430	0,037	NA	NA	NA	NA
Amyloid beta precursor protein antagonist	0,153	0,084	0,244	0,038	0,242	0,039	0,233	0,042	0,274	0,029	0,552	0,005	NA	NA	0,184	0,062	0,139	0,094	0,731	0,003	NA	NA	NA	NA	0,149	0,087	NA	NA	0,147	0,089	0,557	0,005	0,571	0,004
Alopecia treatment	0,468	0,065	0,372	0,128	0,271	0,237	0,298	0,202	0,344	0,153	NA	NA	0,262	0,249	NA	NA	NA	NA	NA	NA	0,288	0,214	0,263	0,247	0,312	0,186	NA	NA	0,286	0,216	NA	NA	NA	NA
Analgesic	NA	NA	NA	NA	NA	NA	NA	NA	NA	NA	0,412	0,066	NA	NA	NA	NA	NA	NA	NA	NA	NA	NA	0,442	0,054	NA	NA	NA	NA	NA	NA	0,781	0,005	0,220	0,204
Analgesic, non-opioid	NA	NA	NA	NA	NA	NA	NA	NA	NA	NA	0,341	0,077	NA	NA	NA	NA	NA	NA	NA	NA	NA	NA	0,417	0,047	NA	NA	NA	NA	NA	NA	0,566	0,017	NA	NA
Anaphylatoxin receptor antagonist	NA	NA	NA	NA	NA	NA	NA	NA	NA	NA	NA	NA	NA	NA	0,404	0,105	NA	NA	NA	NA	NA	NA	NA	NA	0,788	0,013	0,317	0,174	NA	NA	NA	NA	0,541	0,052
Antianginal	NA	NA	NA	NA	0,288	0,191	NA	NA	0,366	0,113	NA	NA	NA	NA	NA	NA	NA	NA	NA	NA	NA	NA	0,269	0,211	NA	NA	0,298	0,180	NA	NA	NA	NA	NA	NA
Antiallergic	NA	NA	0,220	0,164	0,293	0,097	NA	NA	NA	NA	0,297	0,095	0,351	0,070	0,240	0,140	NA	NA	NA	NA	0,231	0,151	NA	NA	NA	NA	NA	NA	NA	NA	NA	NA	NA	NA
Antiasthmatic	NA	NA	NA	NA	0,243	0,127	NA	NA	NA	NA	NA	NA	0,301	0,088	NA	NA	NA	NA	NA	NA	NA	NA	NA	NA	NA	NA	NA	NA	NA	NA	NA	NA	NA	NA
Anticonvulsant	NA	NA	NA	NA	NA	NA	NA	NA	NA	NA	0,354	0,086	NA	NA	NA	NA	NA	NA	NA	NA	0,332	0,100	NA	NA	NA	NA	NA	NA	NA	NA	0,236	0,162	NA	NA
Antifibrinolytic	NA	NA	0,222	0,082	0,217	0,091	NA	NA	NA	NA	NA	NA	NA	NA	NA	NA	NA	NA	NA	NA	0,206	0,115	NA	NA	0,191	0,155	0,189	0,161	NA	NA	NA	NA	NA	NA
Antihemorrhagic	0,159	0,043	0,171	0,034	0,136	0,071	0,131	0,078	0,131	0,078	0,119	0,105	0,133	0,074	0,123	0,095	0,163	0,039	0,116	0,114	0,156	0,045	0,149	0,053	0,167	0,036	NA	NA	0,138	0,067	0,118	0,107	0,130	0,080
Antihypoxic	0,349	0,114	0,353	0,111	0,232	0,225	0,377	0,093	0,376	0,094	0,385	0,088	NA	NA	NA	NA	NA	NA	NA	NA	NA	NA	NA	NA	NA	NA	NA	NA	NA	NA	0,331	0,129	NA	NA
Antiinfective	0,280	0,119	0,273	0,126	NA	NA	0,271	0,128	0,257	0,143	NA	NA	NA	NA	NA	NA	NA	NA	NA	NA	NA	NA	NA	NA	0,264	0,136	0,242	0,161	0,353	0,067	NA	NA	0,215	0,199
Antinephritic	0,284	0,115	0,260	0,167	0,292	0,099	NA	NA	NA	NA	NA	NA	NA	NA	0,294	0,095	NA	NA	NA	NA	NA	NA	0,244	0,204	NA	NA	0,359	0,023	NA	NA	NA	NA	NA	NA
Antineurogenic pain	NA	NA	0,220	0,171	0,235	0,149	NA	NA	NA	NA	0,209	0,186	NA	NA	NA	NA	NA	NA	NA	NA	NA	NA	NA	NA	0,243	0,136	NA	NA	NA	NA	NA	NA	NA	NA
Antineurotic	NA	NA	0,332	0,215	0,398	0,163	0,390	0,169	NA	NA	NA	NA	NA	NA	NA	NA	NA	NA	NA	NA	NA	NA	NA	NA	NA	NA	NA	NA	NA	NA	NA	NA	NA	NA
Antiparasitic	NA	NA	NA	NA	NA	NA	NA	NA	NA	NA	NA	NA	NA	NA	NA	NA	NA	NA	0,416	0,028	NA	NA	NA	NA	0,287	0,060	NA	NA	NA	NA	0,451	0,021	0,415	0,028
Antiparkinsonian	NA	NA	NA	NA	NA	NA	NA	NA	NA	NA	NA	NA	NA	NA	NA	NA	NA	NA	NA	NA	NA	NA	NA	NA	0,202	0,159	NA	NA	NA	NA	NA	NA	0,482	0,014
Antipyretic	NA	NA	0,234	0,084	0,256	0,067	0,229	0,088	0,214	0,102	0,347	0,034	NA	NA	NA	NA	NA	NA	NA	NA	NA	NA	NA	NA	0,309	0,042	0,188	0,125	NA	NA	0,633	0,005	NA	NA
Antiseborrheic	0,335	0,111	0,372	0,100	0,279	0,132	NA	NA	NA	NA	NA	NA	NA	NA	NA	NA	NA	NA	NA	NA	0,231	0,160	0,220	0,167	0,764	0,026	NA	NA	0,295	0,125	NA	NA	NA	NA
Antiuremic	0,235	0,060	0,270	0,046	0,140	0,135	0,345	0,025	0,244	0,056	NA	NA	NA	NA	NA	NA	0,380	0,018	NA	NA	0,416	0,013	0,168	0,101	0,226	0,064	0,225	0,064	NA	NA	NA	NA	NA	NA
APOA1 expression enhancer	0,344	0,124	0,348	0,119	0,345	0,123	NA	NA	0,368	0,098	NA	NA	0,289	0,211	0,273	0,245	0,293	0,202	NA	NA	0,472	0,036	0,346	0,122	0,392	0,077	NA	NA	0,286	0,218	NA	NA	NA	NA
Apoptosis agonist	NA	NA	NA	NA	NA	NA	NA	NA	NA	NA	NA	NA	NA	NA	NA	NA	0,237	0,176	0,389	0,078	NA	NA	NA	NA	0,268	0,148	NA	NA	NA	NA	0,219	0,196	0,421	0,064
ATPase stimulant	NA	NA	NA	NA	NA	NA	NA	NA	NA	NA	NA	NA	NA	NA	NA	NA	0,265	0,046	0,392	0,005	NA	NA	NA	NA	NA	NA	0,283	0,034	0,245	0,067	NA	NA	NA	NA
Autoimmune disorders treatment	NA	NA	NA	NA	NA	NA	NA	NA	NA	NA	NA	NA	NA	NA	NA	NA	NA	NA	NA	NA	NA	NA	NA	NA	NA	NA	NA	NA	NA	NA	0,447	0,041	NA	NA
Bronchodilator	0,146	0,043	0,156	0,037	0,258	0,013	0,120	0,063	0,193	0,023	NA	NA	NA	NA	NA	NA	NA	NA	NA	NA	NA	NA	NA	NA	NA	NA	NA	NA	NA	NA	NA	NA	NA	NA
Calcium channel (voltage-sensitive) activator	0,430	0,141	0,340	0,247	0,433	0,138	NA	NA	NA	NA	NA	NA	NA	NA	NA	NA	NA	NA	NA	NA	0,318	0,278	0,352	0,232	0,350	0,235	NA	NA	NA	NA	NA	NA	NA	NA
Calcium channel N-type blocker	NA	NA	NA	NA	NA	NA	NA	NA	NA	NA	0,301	0,014	NA	NA	NA	NA	NA	NA	0,481	0,005	NA	NA	NA	NA	NA	NA	NA	NA	NA	NA	0,272	0,017	0,379	0,009
Cardiotonic	0,216	0,150	0,259	0,107	0,302	0,077	0,209	0,158	0,242	0,122	0,276	0,093	NA	NA	NA	NA	NA	NA	NA	NA	NA	NA	NA	NA	NA	NA	NA	NA	NA	NA	NA	NA	NA	NA
Catalase stimulant	0,173	0,071	0,179	0,061	0,199	0,033	0,194	0,039	0,200	0,032	0,153	0,122	NA	NA	0,154	0,120	0,188	0,046	0,263	0,006	NA	NA	NA	NA	0,223	0,016	0,187	0,049	0,205	0,028	0,189	0,044	0,196	0,037
CF transmembrane conductance regulator agonist	0,324	0,085	0,291	0,131	NA	NA	NA	NA	NA	NA	NA	NA	NA	NA	NA	NA	NA	NA	0,386	0,037	0,372	0,045	0,377	0,042	0,346	0,064	0,352	0,059	0,316	0,095	0,362	0,051	0,463	0,014
Chemosensitizer	0,322	0,127	NA	NA	0,247	0,238	NA	NA	0,367	0,078	NA	NA	NA	NA	NA	NA	NA	NA	NA	NA	NA	NA	0,342	0,104	NA	NA	0,328	0,121	NA	NA	NA	NA	NA	NA
Chloride channel blocker	0,193	0,158	0,182	0,174	NA	NA	0,271	0,082	0,233	0,112	NA	NA	NA	NA	NA	NA	NA	NA	NA	NA	0,242	0,104	0,227	0,117	NA	NA	0,200	0,148	NA	NA	NA	NA	NA	NA
Cyclic AMP modulator	0,310	0,021	0,260	0,052	0,187	0,179	0,185	0,184	0,196	0,157	NA	NA	NA	NA	NA	NA	NA	NA	NA	NA	0,196	0,158	NA	NA	NA	NA	0,187	0,178	NA	NA	NA	NA	NA	NA
Cystic fibrosis treatment	NA	NA	0,280	0,055	0,271	0,066	0,269	0,070	0,236	0,127	NA	NA	NA	NA	0,253	0,093	NA	NA	NA	NA	NA	NA	NA	NA	NA	NA	NA	NA	NA	NA	NA	NA	NA	NA
Cytoprotectant	0,466	0,072	0,279	0,218	0,305	0,180	0,287	0,206	NA	NA	NA	NA	NA	NA	NA	NA	NA	NA	0,385	0,106	NA	NA	0,284	0,210	NA	NA	NA	NA	0,267	0,235	NA	NA	NA	NA
Dementia treatment	0,263	0,199	0,255	0,213	0,250	0,222	0,303	0,139	NA	NA	NA	NA	NA	NA	NA	NA	NA	NA	NA	NA	NA	NA	NA	NA	NA	NA	0,298	0,145	NA	NA	NA	NA	NA	NA
Dermatologic	0,206	0,160	0,236	0,130	0,185	0,185	NA	NA	NA	NA	NA	NA	0,244	0,123	NA	NA	NA	NA	NA	NA	NA	NA	0,286	0,095	NA	NA	NA	NA	NA	NA	NA	NA	NA	NA
Erythropoiesis stimulant	0,540	0,026	0,346	0,131	NA	NA	NA	NA	NA	NA	NA	NA	NA	NA	NA	NA	NA	NA	NA	NA	0,413	0,080	0,385	0,099	0,328	0,148	NA	NA	0,264	0,228	NA	NA	NA	NA
Eye irritation, inactive	0,248	0,082	0,180	0,133	0,179	0,134	0,173	0,142	0,279	0,069	0,163	0,159	NA	NA	NA	NA	NA	NA	NA	NA	NA	NA	NA	NA	NA	NA	NA	NA	NA	NA	NA	NA	NA	NA
Glycine receptor agonist	0,200	0,010	0,192	0,012	0,191	0,012	0,166	0,023	0,162	0,026	0,150	0,037	0,168	0,022	0,156	0,031	0,164	0,025	NA	NA	0,161	0,027	0,160	0,028	0,155	0,033	NA	NA	0,131	0,068	NA	NA	NA	NA
Glycogen synthase stimulant	0,284	0,093	0,265	0,119	0,282	0,095	0,236	0,171	0,237	0,168	0,256	0,132	0,232	0,180	0,237	0,168	0,240	0,161	NA	NA	0,243	0,155	0,225	0,197	0,339	0,046	NA	NA	0,228	0,190	NA	NA	NA	NA
Gout treatment	0,206	0,053	0,253	0,026	0,246	0,028	0,238	0,033	0,230	0,037	0,228	0,038	0,196	0,061	0,181	0,075	0,199	0,059	NA	NA	0,249	0,027	0,243	0,030	NA	NA	NA	NA	NA	NA	NA	NA	NA	NA
Growth stimulant	NA	NA	NA	NA	NA	NA	NA	NA	NA	NA	NA	NA	NA	NA	NA	NA	NA	NA	0,449	0,007	NA	NA	NA	NA	NA	NA	NA	NA	NA	NA	NA	NA	NA	NA
Gynecological disorders treatment	NA	NA	0,083	0,039	0,078	0,043	0,081	0,041	0,079	0,042	NA	NA	0,064	0,062	0,086	0,037	NA	NA	NA	NA	NA	NA	NA	NA	NA	NA	NA	NA	NA	NA	NA	NA	NA	NA
Quisqualate antagonist	0,293	0,011	0,207	0,036	0,154	0,079	0,181	0,053	0,289	0,011	0,193	0,045	NA	NA	0,142	0,095	NA	NA	NA	NA	0,141	0,096	0,138	0,102	0,138	0,101	NA	NA	0,130	0,114	0,142	0,096	NA	NA
Reductant	0,353	0,065	0,345	0,068	0,239	0,115	NA	NA	0,286	0,091	NA	NA	0,177	0,154	0,280	0,094	NA	NA	NA	NA	NA	NA	0,199	0,138	0,337	0,071	NA	NA	NA	NA	NA	NA	NA	NA
Heart failure treatment	0,338	0,011	0,319	0,013	0,296	0,015	0,260	0,020	0,295	0,016	0,354	0,010	0,136	0,070	0,196	0,038	0,123	0,089	NA	NA	NA	NA	NA	NA	NA	NA	NA	NA	NA	NA	NA	NA	NA	NA
Heat shock protein 27 antagonist	0,334	0,152	0,363	0,107	0,367	0,101	0,284	0,257	NA	NA	0,285	0,255	NA	NA	NA	NA	NA	NA	0,358	0,114	0,332	0,155	NA	NA	NA	NA	NA	NA	NA	NA	0,407	0,059	0,364	0,106
Hemostatic	0,244	0,056	0,353	0,016	0,281	0,034	0,235	0,063	0,206	0,092	0,343	0,017	0,231	0,066	0,219	0,078	0,236	0,062	NA	NA	0,264	0,043	0,230	0,067	0,240	0,059	0,215	0,082	0,256	0,048	NA	NA	NA	NA
HMGCS2 expression enhancer	0,337	0,084	0,298	0,115	0,294	0,119	0,549	0,023	0,460	0,037	0,366	0,067	0,286	0,128	0,283	0,131	0,347	0,077	0,778	0,006	0,281	0,133	0,342	0,080	0,230	0,219	NA	NA	0,615	0,016	0,538	0,024	0,435	0,043
Inotropic	0,377	0,013	0,334	0,028	0,372	0,014	0,259	0,121	0,299	0,057	NA	NA	0,241	0,158	0,261	0,117	NA	NA	NA	NA	0,253	0,133	0,222	0,202	0,234	0,174	0,315	0,042	0,229	0,187	NA	NA	NA	NA
Kidney function stimulant	0,425	0,149	0,338	0,218	NA	NA	0,354	0,205	NA	NA	NA	NA	NA	NA	NA	NA	NA	NA	NA	NA	0,323	0,230	NA	NA	0,315	0,237	NA	NA	NA	NA	NA	NA	NA	NA
Mcl-1 antagonist	0,233	0,040	0,271	0,031	0,255	0,035	0,274	0,030	0,345	0,018	0,182	0,057	0,351	0,017	0,390	0,014	0,179	0,058	0,713	0,004	0,196	0,052	0,296	0,026	0,294	0,026	NA	NA	0,287	0,028	0,523	0,007	0,667	0,005
Metabolic disease treatment	0,223	0,063	0,251	0,044	0,267	0,038	0,264	0,039	0,251	0,044	NA	NA	0,217	0,068	0,234	0,054	NA	NA	NA	NA	NA	NA	NA	NA	NA	NA	NA	NA	NA	NA	NA	NA	NA	NA
Mucomembranous protector	NA	NA	NA	NA	NA	NA	NA	NA	NA	NA	NA	NA	NA	NA	NA	NA	NA	NA	NA	NA	NA	NA	NA	NA	0,672	0,070	NA	NA	NA	NA	NA	NA	0,408	0,169
Multiple sclerosis treatment	NA	NA	NA	NA	NA	NA	NA	NA	NA	NA	NA	NA	NA	NA	NA	NA	NA	NA	NA	NA	NA	NA	NA	NA	NA	NA	NA	NA	NA	NA	NA	NA	0,349	0,037
Muscular dystrophy treatment	0,254	0,179	0,253	0,181	NA	NA	0,283	0,133	0,286	0,128	NA	NA	0,287	0,127	0,297	0,112	NA	NA	NA	NA	NA	NA	NA	NA	0,337	0,072	NA	NA	NA	NA	0,327	0,080	0,375	0,049
Neurodegenerative diseases treatment	NA	NA	NA	NA	NA	NA	NA	NA	NA	NA	NA	NA	0,303	0,132	0,277	0,159	NA	NA	NA	NA	NA	NA	NA	NA	0,253	0,186	NA	NA	NA	NA	NA	NA	0,483	0,035
NF-E2-related factor 2 stimulant	0,308	0,051	0,300	0,054	0,202	0,121	0,175	0,150	NA	NA	NA	NA	0,180	0,144	NA	NA	NA	NA	0,343	0,036	NA	NA	NA	NA	0,339	0,038	0,203	0,121	NA	NA	0,244	0,087	0,341	0,037
Nicotinic alpha6beta3beta4alpha5 receptor antagonist	0,445	0,156	NA	NA	NA	NA	NA	NA	NA	NA	NA	NA	NA	NA	NA	NA	NA	NA	NA	NA	0,322	0,270	0,408	0,185	0,382	0,207	0,354	0,235	0,341	0,248	NA	NA	NA	NA
Nucleotide metabolism regulator	NA	NA	NA	NA	NA	NA	NA	NA	NA	NA	NA	NA	NA	NA	NA	NA	NA	NA	NA	NA	0,399	0,066	0,335	0,107	0,449	0,046	0,342	0,102	0,298	0,132	NA	NA	0,381	0,077
Octopamine antagonist	0,282	0,250	0,310	0,202	0,276	0,262	NA	NA	NA	NA	NA	NA	NA	NA	NA	NA	NA	NA	NA	NA	NA	NA	NA	NA	0,302	0,215	NA	NA	NA	NA	NA	NA	NA	NA
Orexin receptor 1 antagonist	NA	NA	NA	NA	NA	NA	NA	NA	NA	NA	NA	NA	0,152	0,060	NA	NA	NA	NA	0,267	0,021	NA	NA	NA	NA	0,187	0,044	NA	NA	NA	NA	0,401	0,005	0,322	0,012
Photosensitizer	NA	NA	NA	NA	NA	NA	NA	NA	NA	NA	NA	NA	NA	NA	NA	NA	NA	NA	0,208	0,118	NA	NA	NA	NA	0,251	0,084	NA	NA	NA	NA	0,190	0,131	0,332	0,032
Rheumatoid arthritis treatment	NA	NA	NA	NA	NA	NA	NA	NA	NA	NA	0,215	0,115	NA	NA	NA	NA	NA	NA	NA	NA	NA	NA	NA	NA	NA	NA	NA	NA	NA	NA	0,577	0,006	NA	NA
Thromboxane B2 antagonist	0,283	0,231	0,357	0,144	0,401	0,100	NA	NA	0,387	0,114	NA	NA	NA	NA	NA	NA	NA	NA	NA	NA	0,371	0,130	NA	NA	0,342	0,161	0,287	0,225	0,367	0,134	NA	NA	NA	NA
TRKB antagonist	0,261	0,059	0,342	0,013	0,346	0,012	0,342	0,013	0,321	0,021	0,301	0,032	0,266	0,055	0,310	0,027	NA	NA	NA	NA	0,258	0,061	NA	NA	NA	NA	NA	NA	NA	NA	NA	NA	NA	NA
